# Supplementary material for: Red-light-activatable ruthenium phthalocyanine catalysts
Source: Royal Society of Chemistry journal article supplement (doi:10.1039/d1cc06307c), 2021-01-01
Supplement: d1cc06307c1.pdf [file d1cc06307c1.pdf]

## Red-light-activatable ruthenium phthalocyanine catalysts

Yuta Ishikawa<sup>1</sup>, Tatsuya Kameyama<sup>2,3</sup>, Tsukasa Torimoto<sup>2</sup>, Hajime Maeda<sup>1</sup>,

Masahito Segi<sup>1</sup> and Taniyuki Furuyama<sup>\*,1,3</sup>

<sup>1</sup>*Graduate School of Natural Science and Technology, Kanazawa University, Kakuma-machi, Kanazawa, 920-1192, Japan*

<sup>2</sup>*Graduate School of Engineering, Nagoya University, Nagoya, 464-8603, Japan*

<sup>3</sup>*Japan Science and Technology Agency (JST)-PRESTO, 4-1-8 Honcho, Kawaguchi, Saitama, 332-0012, Japan*

### Supporting information

#### Table of Contents

|                                                |      |
|------------------------------------------------|------|
| General Comments                               | S-1  |
| Additional Experimental Results                | S-3  |
| Full Experimental Procedures                   | S-9  |
| Copies of the NMR Spectra of Studied Compounds | S-21 |
| References                                     | S-50 |

## General Comments

### Instrumentation

Photoreactions were carried out in a reaction vessel wherein the reaction mixtures were irradiated using red ( $\lambda_{\text{max}} = 634 \text{ nm}$ ) or blue ( $\lambda_{\text{max}} = 470 \text{ nm}$ ) LED light. LDL2-119X16RD2 (nominal wavelength: 634 nm, fwhm: 15.0 nm) and ALDKIT001 (nominal wavelength: 470 nm, fwhm: 24.7 nm) were purchased from CCS Inc. and Aldrich Inc., respectively (Fig. S10). The output power was 12 W, and the LED light was placed 5.0 cm from the reaction vessel. NMR spectra were obtained using JEOL ECA-500 or Bruker AVANCE 400 spectrometer. Chemical shifts are expressed in  $\delta$  (ppm) values, and coupling constants are expressed in hertz (Hz).  $^1\text{H}$  and  $^{13}\text{C}$  NMR spectra were referenced to the tetramethylsilane (TMS) or the residual solvent as an internal standard.  $^{19}\text{F}$  NMR spectra were referenced to the trifluoroacetic acid ( $\delta = -79.0 \text{ ppm}$ ) as an internal standard. The following abbreviations are used: s = singlet, d = doublet, m = multiplet, and brs = broad singlet. High-resolution mass spectra (HRMS) were recorded using a Bruker Daltonics solariX spectrometer (MALDI). Electronic absorption spectra were recorded on a JASCO V-770 spectrophotometer. A photonic multichannel analyzer (Hamamatsu, PMA-12) was used for the measurement of phosphorescence spectra under  $\text{N}_2$  atmosphere, in which the wavelength of excitation light was 632 nm. Cyclic voltammetry (CV) measurements were recorded using a Hokuto Denko HZ5000 potentiostat under a nitrogen atmosphere with 0.1 M of tetrabutylammonium perchlorate (TBAP) as the supporting electrolyte. Measurements were made using a glassy carbon electrode (area =  $0.07 \text{ cm}^2$ ), an Ag/AgCl reference electrode, and a Pt wire counter electrode. The concentration of the solution was fixed at 0.5 mM, and the sweep rate was set to 100 mV/s. The ferrocenium/ferrocene ( $\text{Fc}^+/\text{Fc}$ ) couple was used as an internal standard.

### Materials

Unless otherwise noted, materials were purchased from Tokyo Kasei Co., Aldrich Inc., and other commercial suppliers and were used after appropriate purification (distillation or recrystallization). **ZnPc**,<sup>1</sup> **Ru(py)<sub>2</sub>TAP**,<sup>2</sup> **2a**,<sup>3</sup> **2c**,<sup>4</sup> **2d**,<sup>5</sup> **2e**,<sup>6</sup> **2f**,<sup>7</sup> **2g**,<sup>8</sup> **2j**,<sup>9</sup> and **2n**<sup>10</sup> were synthesized according to published procedures.

### Crystallographic data collection

Data collection for **1b** was carried out on a Bruker APEXIII CCD diffractometer with Bruker Helios multilayered confocal mirror monochromatized CuK $\alpha$  radiation ( $\lambda = 1.54178 \text{ \AA}$ ) at  $-183^\circ\text{C}$ . The structures were solved by a direct method (SIR2004)<sup>11</sup> and refined using a full-matrix least square technique (SHELXL-2014).<sup>12</sup> Yadokari-XG 2009 software was used as a GUI for SHELXL-2014.<sup>13</sup> All non-hydrogen atoms were refined anisotropically. Positions of all hydrogen atoms were calculated geometrically, and refined by applying riding models. Some large electron peaks due to a solvent molecule(s) were found in the unit cell. As we failed to model them properly, the rest molecules were refined without the effect of the solvent molecule(s) by the Platon squeeze technique.<sup>14</sup> CCDC-2108084 contains the supplementary crystallographic data. Their data can be obtained free of charge from Crystallographic Data Centre via [www.ccdc.cam.ac.uk/data\\_request/cif](http://www.ccdc.cam.ac.uk/data_request/cif).

## Additional Experimental Results

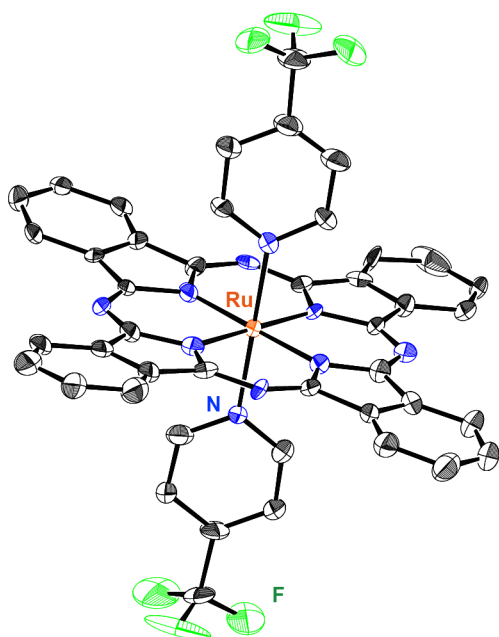

**Fig. S1** Molecular structure of **1b** with thermal ellipsoids at 50% probability. Hydrogen atoms have been omitted for clarity and only selected atoms have been labeled.



**Table S1** Crystal data and structure refinement for **1b**.

|                                         |                                                                   |                            |
|-----------------------------------------|-------------------------------------------------------------------|----------------------------|
| Empirical formula                       | C <sub>44</sub> H <sub>24</sub> F <sub>6</sub> N <sub>10</sub> Ru |                            |
| Formula weight                          | 907.80                                                            |                            |
| Temperature                             | 90(2) K                                                           |                            |
| Wavelength                              | 1.54178 Å                                                         |                            |
| Crystal system                          | Monoclinic                                                        |                            |
| Space group                             | Cc                                                                |                            |
| Unit cell dimensions                    | $a = 20.1094(18)$ Å                                               | $\alpha = 90^\circ$        |
|                                         | $b = 22.559(2)$ Å                                                 | $\beta = 108.370(2)^\circ$ |
|                                         | $c = 10.5878(10)$ Å                                               | $\gamma = 90^\circ$        |
| Volume                                  | 4558.4(7) Å <sup>3</sup>                                          |                            |
| Z                                       | 4                                                                 |                            |
| Density (Calcd.)                        | 1.323 Mg/m <sup>3</sup>                                           |                            |
| Absorption coefficient                  | 3.351 mm <sup>-1</sup>                                            |                            |
| $F(000)$                                | 1824                                                              |                            |
| Crystal size                            | 0.200 × 0.200 × 0.100 mm <sup>3</sup>                             |                            |
| Theta range for data collection         | 5.920 to 66.497°                                                  |                            |
| Index ranges                            | -23 ≤ $h$ ≤ 23, -26 ≤ $k$ ≤ 25, -12 ≤ $l$ ≤ 12                    |                            |
| Reflections collected                   | 14260                                                             |                            |
| Independent reflections                 | 6274 [ $R(\text{int}) = 0.0395$ ]                                 |                            |
| Completeness to $\theta = 66.497^\circ$ | 98.1%                                                             |                            |
| Refinement method                       | Full-matrix least-squares on $F^2$                                |                            |
| Data / restraints / parameters          | 6274 / 2 / 550                                                    |                            |
| Goodness-of-fit on $F^2$                | 1.042                                                             |                            |
| Final $R$ indices [ $I > 2\sigma(I)$ ]  | $R_1 = 0.0431$ , $wR_2 = 0.1125$                                  |                            |
| $R$ indices (all data)                  | $R_1 = 0.0435$ , $wR_2 = 0.1133$                                  |                            |
| Largest diff. peak and hole             | 1.635 and -0.861 e.Å <sup>-3</sup>                                |                            |
| CCDC No.                                | 2108084                                                           |                            |

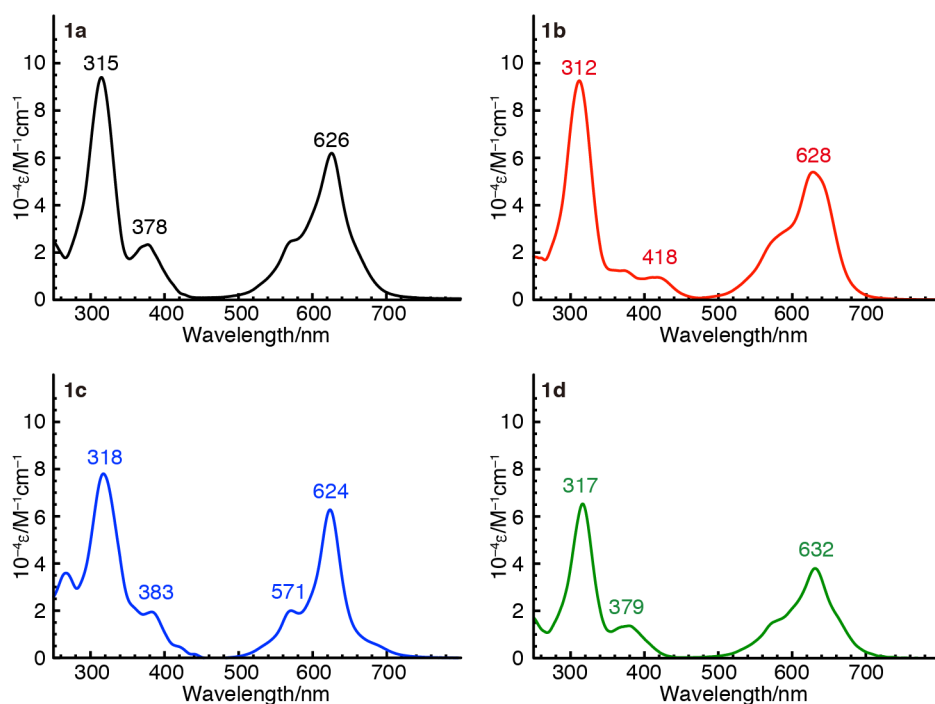

**Fig. S2** Absorption spectra of RuPcs **1a-d** in  $\text{CHCl}_3$ .

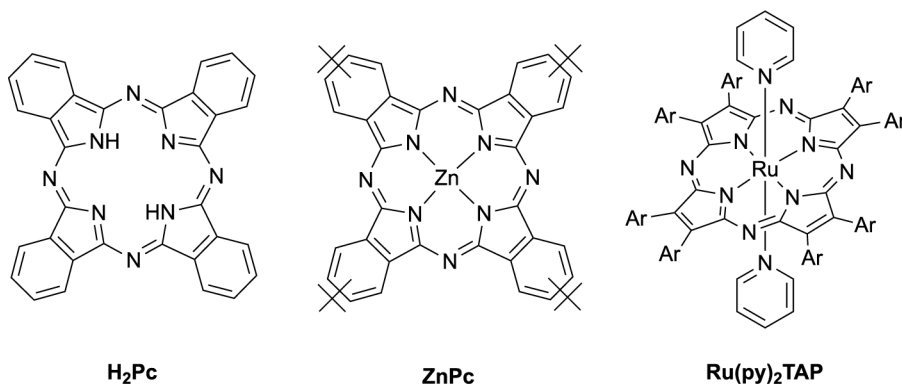

**Fig. S3** Structures of **H<sub>2</sub>Pc**, **ZnPc**, and **Ru(py)<sub>2</sub>TAP**.

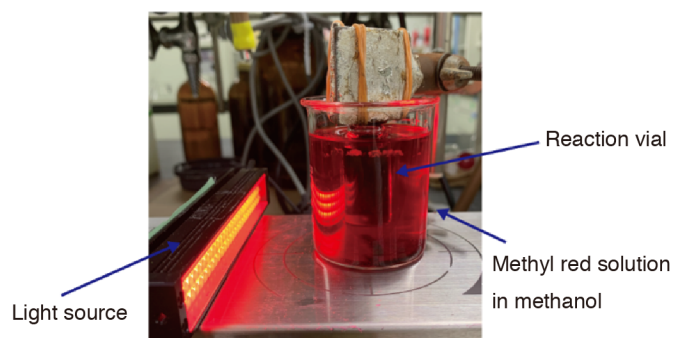

**Fig. S4** Reaction setup for the shielded condition. The photo shows the reaction vessel immersed in a

methanol solution of methyl red (Fig. 3a, entry 2). The entire reaction system was shielded from natural light during the photoreaction.

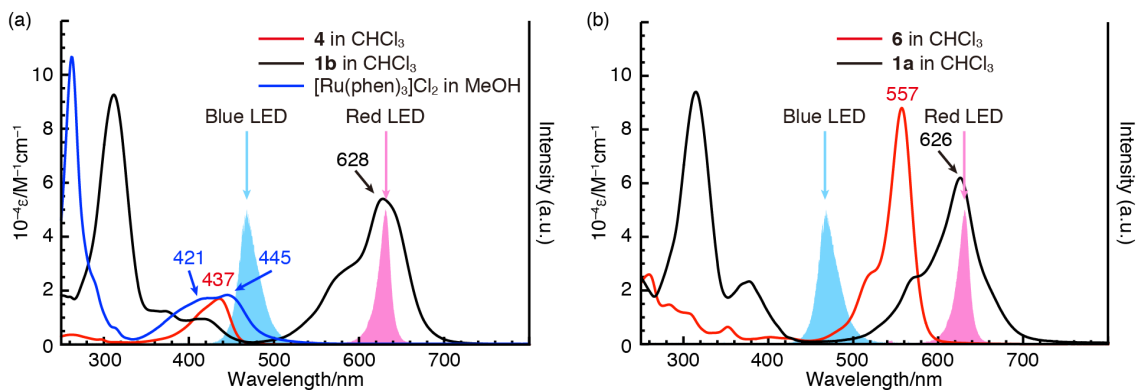

**Fig. S5** Absorption spectra of (a) **1b**, **4**, and  $[\text{Ru}(\text{phen})_3]\text{Cl}_2$  and (b) **1a** and **6**. The emission spectra of the LEDs overlapped.

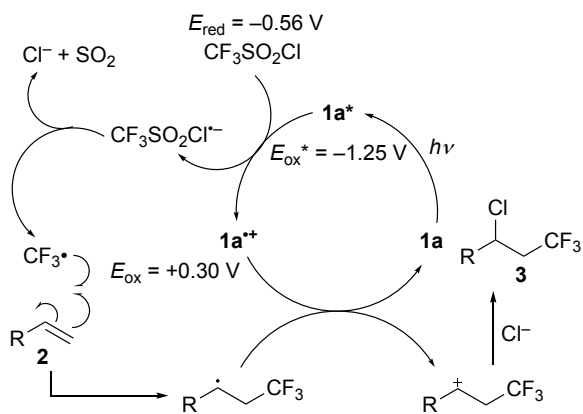

**Fig. S6** Plausible reaction mechanism.

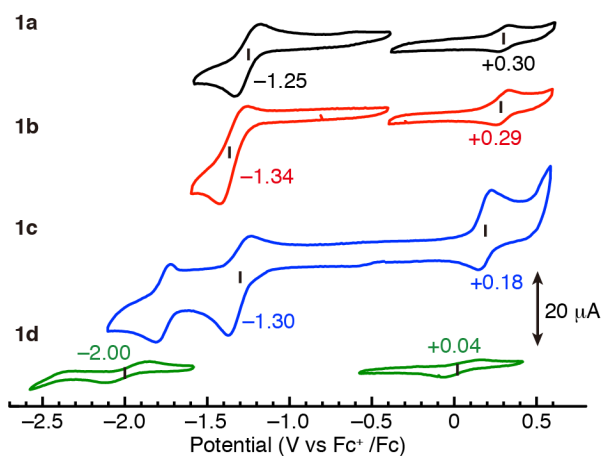

**Fig. S7** Cyclic voltammograms of RuPcs **1a-d** recorded using 0.5 mM solutions of the analytes in  $[\text{nBu}_4\text{N}]\text{ClO}_4/\text{DMF}$ . Ferrocene was used as the internal standard and the  $\text{Fc}/\text{Fc}^+$  couple was set to 0 V.

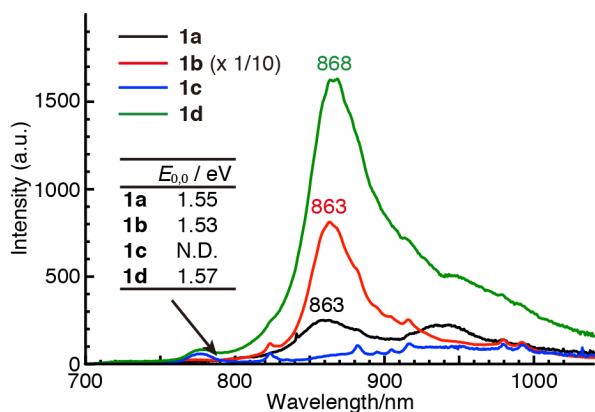

**Fig. S8** Phosphorescence spectra of RuPcs **1a-d** (2  $\mu\text{M}$ ) in acetone under an  $\text{N}_2$  atmosphere ( $\lambda_{\text{ex}} = 632$  nm).

**Table S2** Summary of optical and redox parameters for the photocatalysts

| Catalyst                                | $E_{\text{ox}} [\text{V}]^a$<br>(cat/cat <sup>+</sup> ) | $E_{\text{red}} [\text{V}]^a$<br>(cat/cat <sup>-</sup> ) | $\lambda_{\text{phos, max}}$<br>[nm] | $E_{0,0} [\text{eV}]$ | $E_{\text{ox}}^* [\text{V}]^a$<br>(cat*/cat <sup>+</sup> ) | $E_{\text{red}}^* [\text{V}]^a$<br>(cat*/cat <sup>-</sup> ) |
|-----------------------------------------|---------------------------------------------------------|----------------------------------------------------------|--------------------------------------|-----------------------|------------------------------------------------------------|-------------------------------------------------------------|
| <b>1a</b>                               | +0.30                                                   | -1.25                                                    | 863                                  | 1.55                  | -1.25                                                      | +0.30                                                       |
| <b>1b</b>                               | +0.29                                                   | -1.34                                                    | 863                                  | 1.53                  | -1.24                                                      | +0.19                                                       |
| <b>1c</b>                               | +0.18                                                   | -1.30                                                    | N.D. <sup>b</sup>                    | N.D. <sup>b</sup>     | N.D. <sup>b</sup>                                          | N.D. <sup>b</sup>                                           |
| <b>1d</b>                               | +0.04                                                   | -2.00                                                    | 868                                  | 1.57                  | -1.53                                                      | -0.43                                                       |
| $\text{Ru}(\text{phen})_3\text{Cl}_2^c$ | +0.88                                                   | -1.74                                                    | 610                                  | 2.15                  | -1.25                                                      | +0.44                                                       |

<sup>a</sup> vs  $\text{Fc}/\text{Fc}^+$ . <sup>b</sup> Not determined. <sup>c</sup> The data was taken from ref. 15.

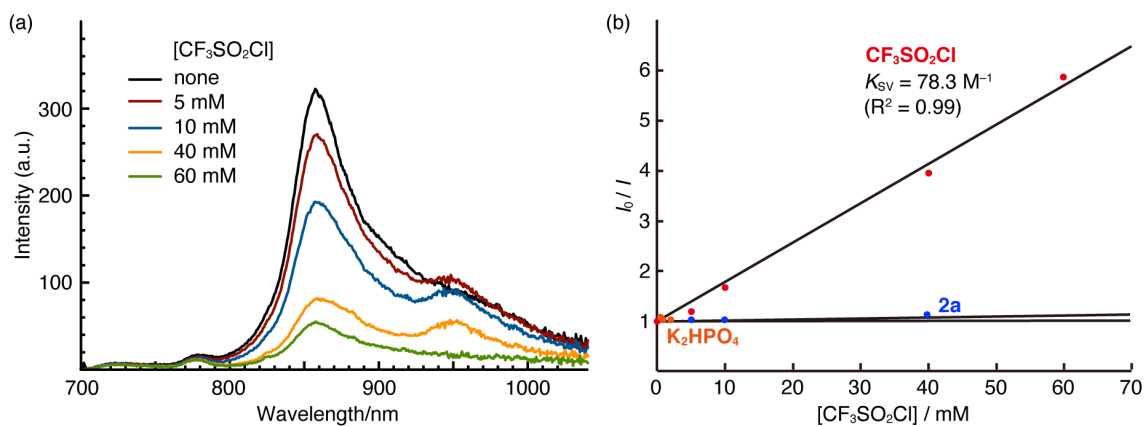

**Fig. S9** (a) Phosphorescence spectra of **1a** (16  $\mu\text{M}$ , in acetone) with  $\text{CF}_3\text{SO}_2\text{Cl}$  (0–60 mM). (b) The Stern-Volmer plot for **1a**/ $\text{CF}_3\text{SO}_2\text{Cl}$ , **2a**, and  $\text{K}_2\text{HPO}_4$ . When the lifetime  $\tau$  of **1a** was 135 ns (in  $\text{CH}_2\text{Cl}_2$ )<sup>16</sup>, the quencher rate coefficient  $k_q$  of  $\text{CF}_3\text{SO}_2\text{Cl}$  was calculated as  $5.8 \times 10^8 \text{ M}^{-1}\text{s}^{-1}$ .

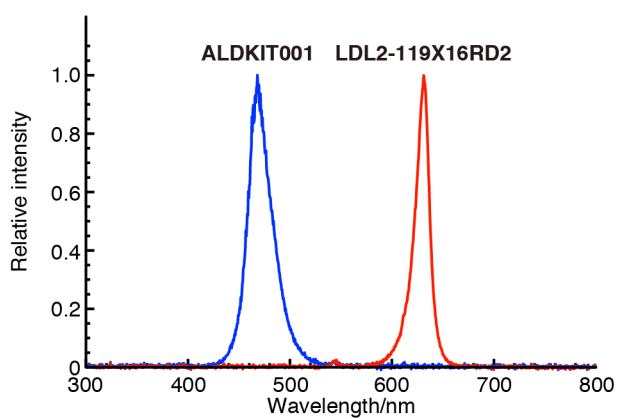

**Fig. S10** Emission spectra of the NIR and blue LEDs.

## Full Experimental Procedures

### Preparation of catalysts

#### Bis(pyridyl) ruthenium(II) phthalocyanine (**1a**)<sup>17</sup>

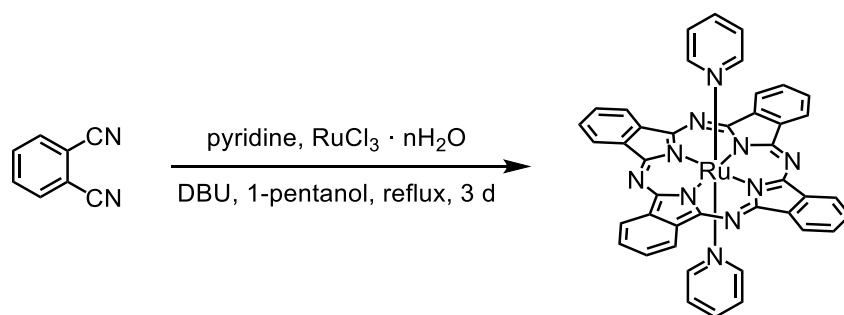

A mixture of phthalonitrile (201 mg, 1.6 mmol), pyridine (0.15 mL, 1.9 mmol), and DBU (0.05 mL, 0.33 mmol) in 1-pentanol (4.0 mL) was refluxed. At the same time, RuCl<sub>3</sub>·nH<sub>2</sub>O (108 mg, 521 μmol) was boiled in 1-pentanol (2.0 mL) until a blue color formed. The RuCl<sub>3</sub> blue solution was added over 5 min to the phthalonitrile/pyridine/DBU mixture, and resulting solution was refluxed for 3 d. After the 1-pentanol was removed by evaporation, the crude product was purified by silica gel column chromatography (CHCl<sub>3</sub>). The blue band was collected and concentrated. Then, MeOH was added to the residue, and precipitate was collected by filtration. The desired complex was obtained as a blue solid. (61.9 mg, 20%)

400 MHz <sup>1</sup>H NMR(CDCl<sub>3</sub>) δ(ppm): 9.16-9.14 (m, 8H, Pc-H), 7.90-7.88 (m, 8H, Pc-H), 6.04 (t, *J* = 7.6 Hz, 2H, py), 5.23 (dd, *J* = 7.6, 6.8 Hz, 4H, py), 2.45 (d, *J* = 5.2 Hz, 4H, py).

UV-vis(CHCl<sub>3</sub>) (ε×10<sup>-4</sup>) λ<sub>max</sub> nm: 315(9.4), 378(2.3), 626(6.2).

HR-MALDI-FT-ICR-MS calcd for C<sub>37</sub>H<sub>21</sub>N<sub>9</sub>Ru [M-pyridine]<sup>+</sup>: 693.0968. Found: 693.0959.

**Bis(4-trifluoromethylpyridyl) ruthenium(II) phthalocyanine (1b)**

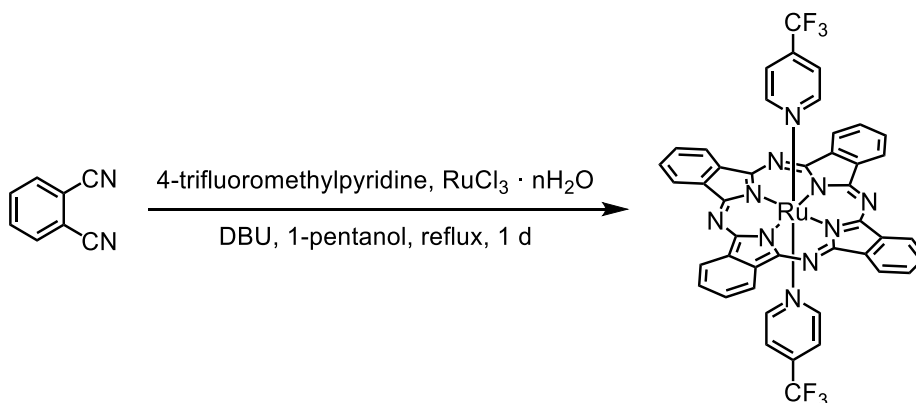

Synthesized according to the procedure for **1a**. Blue solid. (14%)

500 MHz  $^1\text{H}$  NMR( $\text{CDCl}_3$ )  $\delta$ (ppm): 9.21-9.17 (m, 8H, Pc-H), 7.96-7.92 (m, 8H, Pc-H), 5.47 (d,  $J = 7.4$  Hz, 4H, 4- $\text{CF}_3$ -py), 2.53 (d,  $J = 6.4$  Hz, 4H, 4- $\text{CF}_3$ -py).

470MHz  $^{19}\text{F}$ -NMR ( $\text{CDCl}_3$ )  $\delta$ (ppm): -67 (s,  $\text{CF}_3$ ).

UV-vis( $\text{CHCl}_3$ ) ( $\epsilon \times 10^{-4}$ )  $\lambda_{\text{max}}$  nm: 312(9.3), 418(0.95), 628(5.4).

HR-MALDI-FT-ICR-MS calcd for  $\text{C}_{44}\text{H}_{24}\text{F}_6\text{N}_{10}\text{Ru}$   $[\text{M}]^+$  : 908.1139. Found: 908.1131.

**Bis(*N,N*-dimethyl-4-aminopyridyl) ruthenium(II) phthalocyanine (1c)**

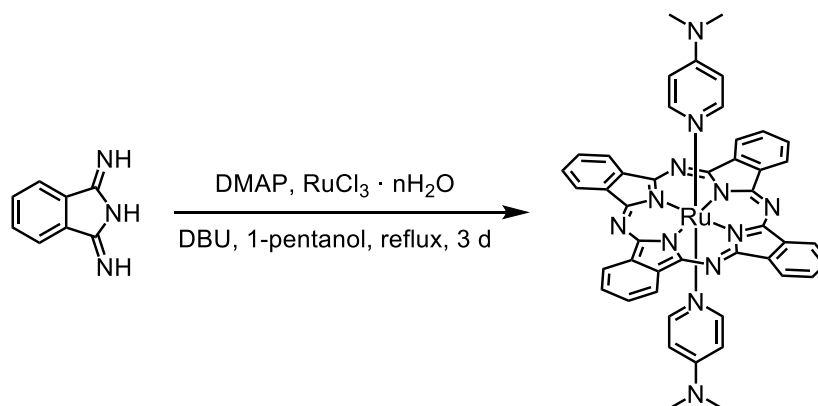

Synthesized according to the procedure for **1a**. Blue solid. (7%)

400 MHz  $^1\text{H}$  NMR( $\text{CDCl}_3$ )  $\delta$ (ppm): 9.09-9.07 (m, 8H, Pc-H), 7.83-7.81 (m, 8H, Pc-H), 4.37 (d,  $J = 7.6$  Hz, 4H, DMAP), 2.21 (d,  $J = 7.6$  Hz, 4H, DMAP), 2.01 (s, 12H, DMAP).

UV-vis( $\text{CHCl}_3$ ) ( $\epsilon \times 10^{-4}$ )  $\lambda_{\text{max}}$  nm: 318(7.8), 383(1.9), 571(2.0), 624(6.3).

HR-MALDI-FT-ICR-MS calcd for  $\text{C}_{46}\text{H}_{36}\text{N}_{12}\text{Ru}$   $[\text{M}]^+$  : 858.2236. Found: 858.2239.

**$\beta$ -tetrakis(*t*-Bu) bis(pyridyl) ruthenium(II) phthalocyanine (1d)<sup>18</sup>**

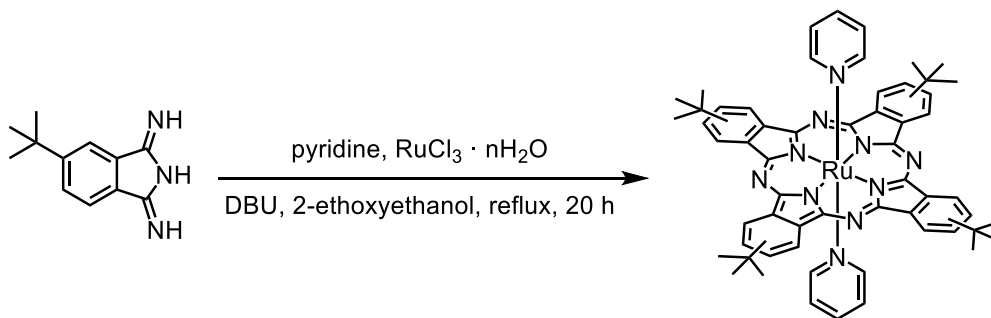

A mixture of 6-*t*-Bu-1,3-diminoindoline (500 mg, 2.5 mmol), pyridine (1.3 mL, 17 mmol), RuCl<sub>3</sub>·nH<sub>2</sub>O (150 mg, 750 μmol), and DBU (1.0 mL, 6.70 mmol) in 2-ethoxyethanol (5.0 mL) was refluxed for 20 h under Ar atmosphere. After the reaction mixture was cooled, MeOH was added. Then, the precipitate was collected by filtration. After the residue was dried under reduced pressure, the product was purified by silica gel column chromatography (CHCl<sub>3</sub>). The desired complex was obtained as a blue solid. (5.1 mg, 8%)

400 MHz <sup>1</sup>H NMR(CDCl<sub>3</sub>) δ(ppm): 9.21-9.16 (m, 4H, Pc-H), 9.09-9.03 (m, 4H, Pc-H), 7.97-7.26 (m, 4H, Pc-H), 6.01 (t, *J* = 7.8 Hz, 2H, py), 5.21 (dd, *J* = 7.52, 6.64 Hz, 4H, py), 2.47 (d, *J* = 5.2 Hz, 4H, py), 1.74-1.23 (m, 36H, *t*-Bu)

UV-vis(CHCl<sub>3</sub>) ( $\epsilon \times 10^{-4}$ )  $\lambda_{\max}$  nm: 317(6.6), 379(1.4), 632(3.8).

HR-MALDI-FT-ICR-MS calcd for C<sub>58</sub>H<sub>58</sub>N<sub>10</sub>Ru [M]<sup>+</sup>: 996.3900. Found: 996.3901.

**Preparation of substrates**

**Compound 2i**

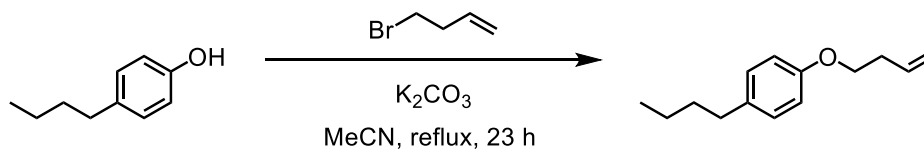

To a solution of 4-butylphenol (316 mg, 2.1 mmol) and K<sub>2</sub>CO<sub>3</sub> (733 mg, 5.3 mmol) in 20 mL of MeCN, 4-bromo-1-butene (549 mg, 4.1 mmol) was added, and the mixture was refluxed for 23 h. The reaction was quenched with water, extracted with EtOAc and washed with water and brine. The organic layer was dried over Na<sub>2</sub>SO<sub>4</sub> and concentrated in *vacuo*. The product was purified by silica gel column chromatography (hexane : EtOAc = 9 : 1). The desired compound was obtained as colorless oil. (165 mg,



38%)

400 MHz  $^1\text{H}$  NMR ( $\text{CDCl}_3$ )  $\delta$ (ppm): 7.08 (d,  $J = 8.7$  Hz, 2H, Ar), 6.82 (d,  $J = 8.7$  Hz, 2H, Ar), 5.94-5.87 (m, 1H, CH), 5.19-5.08 (m, 2H,  $\text{CH}_2$ ), 3.99 (t,  $J = 6.7$  Hz, 2H,  $\text{CH}_2$ ), 2.56-2.51 (m, 4H,  $\text{CH}_2 \times 2$ ), 1.59-1.52 (m, 2H,  $\text{CH}_2$ ), 1.37-1.31 (m, 2H,  $\text{CH}_2$ ), 0.92 (t,  $J = 7.3$  Hz, 3H,  $\text{CH}_3$ ).

100 MHz  $^{13}\text{C}$  NMR( $\text{CDCl}_3$ )  $\delta$ (ppm): 157.05, 135.19, 134.73, 129.36, 117.01, 114.51, 67.38, 34.87, 34.04, 33.87, 22.44, 14.10.

HR-FAB-MS calcd for  $\text{C}_{14}\text{H}_{21}\text{O}$   $[\text{M}+\text{H}]^+$ : 205.1587. Found: 205.1588.

### Compound 2k

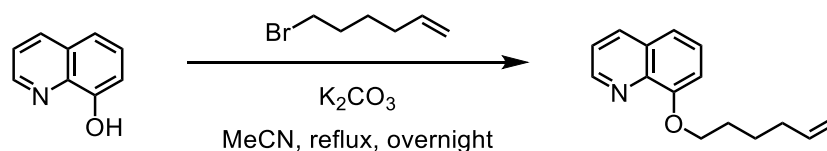

To a solution of 8-hydroxyquinoline (218 mg, 1.5 mmol) and  $\text{K}_2\text{CO}_3$  (525 mg, 3.8 mmol) in 5 mL of MeCN, 6-bromo-1-hexene (294 mg, 1.8 mmol) was added, and the mixture was refluxed overnight. The reaction was quenched with water, extracted with EtOAc and washed with water. The organic layer was dried by  $\text{Na}_2\text{SO}_4$  and concentrated in *vacuo*. The product was purified by silica gel column chromatography (hexane : EtOAc = 9 : 1). The desired compound was obtained as colorless oil. (332 mg, 99%)

400 MHz  $^1\text{H}$  NMR ( $\text{CDCl}_3$ )  $\delta$ (ppm): 8.95 (dd,  $J = 4.2, 1.8$  Hz, 1H, Ar), 8.12 (dd,  $J = 8.3, 1.7$  Hz, 1H, Ar), 7.46-7.36 (m, 3H, Ar), 7.06 (dd,  $J = 7.7, 1.3$  Hz, 1H, Ar), 5.85-5.81 (m, 1H, CH), 5.06-4.95 (m, 2H,  $\text{CH}_2$ ), 4.25 (t,  $J = 7.0$  Hz, 2H,  $\text{CH}_2$ ), 2.18-2.14 (m, 2H,  $\text{CH}_2$ ), 2.07-2.03 (m, 2H,  $\text{CH}_2$ ), 1.67-1.63 (m, 2H,  $\text{CH}_2$ ).

100 MHz  $^{13}\text{C}$  NMR( $\text{CDCl}_3$ )  $\delta$ (ppm): 154.92, 149.37, 140.50, 138.58, 135.94, 129.58, 126.74, 121.59, 119.47, 114.87, 108.68, 68.84, 33.59, 28.53, 25.46.

HR-MALDI-FT-ICR-MS calcd for  $\text{C}_{15}\text{H}_{17}\text{NO}$   $[\text{M}]^+$ : 228.1383. Found: 228.1384.

#### Compound 4

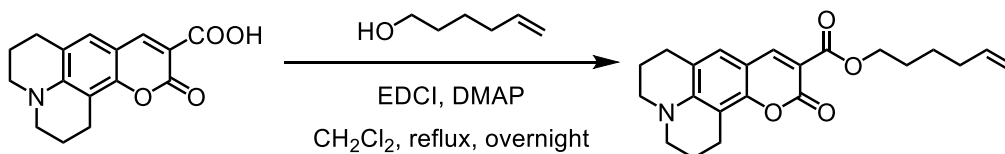

A mixture of Coumarin 343 (77 mg, 0.20 mmol), 5-hexen-1-ol (64 mg, 0.64 mmol), *N,N*-dimethylaminopyridine (DMAP) (25 mg, 0.20 mmol), 1-(3-dimethylaminopropyl)-3-ethylcarbodiimide hydrochloride (EDCI) (78 mg, 0.41 mmol), in 20 mL of CH<sub>2</sub>Cl<sub>2</sub> was refluxed overnight. The reaction was quenched with water, extracted with CH<sub>2</sub>Cl<sub>2</sub> and washed with 1N HCl (×2), sat. NaHCO<sub>3</sub>aq and brine. The organic layer was dried over Na<sub>2</sub>SO<sub>4</sub> and concentrated in *vacuo*. The product was purified by silica gel column chromatography (CHCl<sub>3</sub>: MeOH = 30 : 1). The desired compound was obtained as a yellow solid. (64 mg, 87%).

400 MHz <sup>1</sup>H NMR (CDCl<sub>3</sub>) δ(ppm): 8.30 (s, 1H, Ar), 6.94 (s, 1H, Ar), 5.91-5.73 (m, 1H, CH), 5.10-4.90 (m, 2H, CH<sub>2</sub>), 4.29 (t, *J* = 6.7 Hz, 2H, CH<sub>2</sub>), 3.33 (q, *J* = 6.5 Hz, 4H, CH<sub>2</sub>×2), 2.87 (t, *J* = 6.4 Hz 2H, CH<sub>2</sub>), 2.75 (t, *J* = 6.2 Hz 2H, CH<sub>2</sub>), 2.19-2.04 (m, 2H, CH<sub>2</sub>), 2.01-1.93 (m, 4H, CH<sub>2</sub>×2), 1.84-1.71 (m, 2H, CH<sub>2</sub>), 1.64-1.46 (m, 2H, CH<sub>2</sub>)

100 MHz <sup>13</sup>C NMR(CDCl<sub>3</sub>) δ(ppm): 164.76, 158.74, 153.61, 149.20, 148.58, 138.65, 127.06, 119.23, 114.90, 107.81, 107.66, 105.93, 65.00, 50.39, 50.01, 33.49, 28.33, 27.56, 25.41, 21.32, 20.34, 20.22.

UV-vis(CHCl<sub>3</sub>) (ε×10<sup>-4</sup>) λ<sub>max</sub> nm: 437(1.7).

HR-MALDI-FT-ICR-MS calcd for C<sub>22</sub>H<sub>25</sub>NO<sub>4</sub> [M]<sup>+</sup>: 367.1778. Found: 367.1792.

#### Compound 6<sup>19</sup>

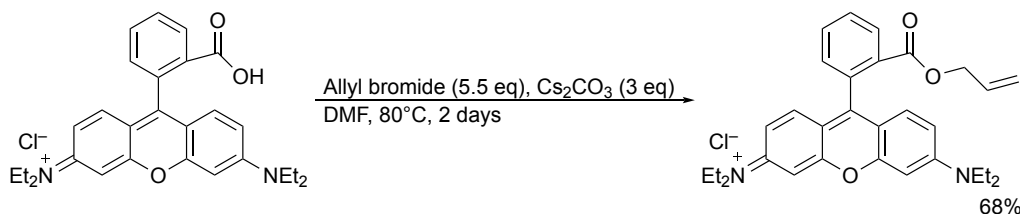

To a flask, rhodamine B (479 mg, 1.0 mmol), allyl bromide (658 mg, 5.4 mmol), and Cs<sub>2</sub>CO<sub>3</sub> (990 mg, 3.0 mmol) were dissolved in 10 mL of dry DMF and the mixture was heated at 80°C for 2 days. Then, the solvent was removed *in vacuo*. The product was purified by silica gel column chromatography (CHCl<sub>3</sub>: MeOH = 100 : 1). The desired compound was obtained as a gold solid. (352 mg, 68%).

500 MHz  $^1\text{H}$  NMR ( $\text{CDCl}_3$ )  $\delta$ (ppm): 8.30 (dd,  $J = 7.9, 0.9$  Hz, 1H, Ar), 7.82 (td,  $J = 7.5, 1.3$  Hz, 1H, Ar), 7.73 (td,  $J = 7.7, 1.3$  Hz, 1H, Ar), 7.31 (dd,  $J = 7.6, 0.9$  Hz, 1H, Ar), 7.06 (d,  $J = 9.5$  Hz, 2H, Ar), 6.91 (dd,  $J = 9.5, 2.5$  Hz, 2H, Ar), 6.80 (d,  $J = 2.5$  Hz, 2H, Ar), 5.71-5.66 (m, 1H, CH), 5.21-5.10 (m, 2H,  $\text{CH}_2$ ), 4.50 (dt,  $J = 5.9, 1.3$  Hz 2H,  $\text{CH}_2$ ), 3.65 (q,  $J = 7.2$  Hz 8H,  $\text{CH}_2 \times 4$ ), 1.32 (t,  $J = 7.1$  Hz 12H,  $\text{CH}_3 \times 4$ ).

100MHz  $^{13}\text{C}$ -NMR( $\text{CDCl}_3$ )  $\delta$ (ppm): 164.86, 158.83, 157.91, 155.69, 133.80, 133.35, 131.46, 131.40, 131.25, 130.53, 130.47, 130.05, 119.24, 114.48, 113.73, 96.57, 66.26, 46.37, 12.85.

UV-vis( $\text{CHCl}_3$ ) ( $\epsilon \times 10^{-4}$ )  $\lambda_{\text{max}}$  nm: 260(2.6), 352(0.64), 557(8.8).

### General procedure for the red-light-mediated chlorotrifluoromethylation of alkenes: Compound **3a**

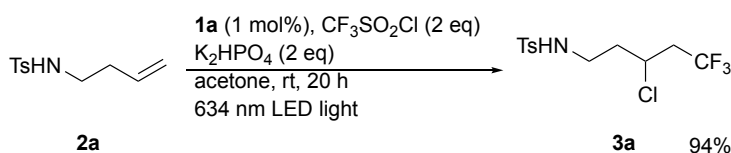

In a 4 mL glass-vial, **1a** (3.9 mg, 5  $\mu\text{mol}$ ),  $\text{K}_2\text{HPO}_4$  (174.1 mg, 1 mmol), and **2a** (59 mg, 0.5 mmol) were suspended in acetone (3 mL) and the solution was degassed by argon. After  $\text{CF}_3\text{SO}_2\text{Cl}$  (169.0 mg, 1 mmol) was added, the reaction mixture was stirred for 20 h and irradiation with 634 nm red-LED light, then the reaction was quenched with water. The mixture was extracted with ethyl acetate, and then washed with water and brine. The organic layer was dried over  $\text{Na}_2\text{SO}_4$ . The solvent was removed and purified using flash column chromatography on silica gel (hexane:ethyl acetate = 9:1 v/v). Compound **3a**<sup>20</sup> was obtained (155 mg, 94%) as a white solid.

500 MHz  $^1\text{H}$  NMR ( $\text{CDCl}_3$ )  $\delta$ (ppm): 7.75 (d,  $J = 8.3$  Hz, 2H, Ar), 7.33 (d,  $J = 8.0$  Hz, 2H, Ar), 4.61 (br t,  $J = 6.5$  Hz, 1H, NH), 4.18-4.16 (m, 1H, CH), 3.23-3.12 (m, 2H,  $\text{CH}_2$ ), 2.67-2.57 (m, 1H,  $\text{CH}_2$ ), 2.54-2.46 (m, 1H,  $\text{CH}_2$ ), 2.44 (s, 3H,  $\text{CH}_3$ ), 2.13-2.07 (m, 1H,  $\text{CH}_2$ ), 1.87-1.80 (m, 1H,  $\text{CH}_2$ ).

100 MHz  $^{13}\text{C}$  NMR( $\text{CDCl}_3$ )  $\delta$ (ppm): 143.95, 136.65, 130.00, 127.21 (q,  $J_{\text{C,F}} = 277.7$  Hz), 51.32 (q,  $J_{\text{C,F}} = 3.3$  Hz), 42.44 (q,  $J_{\text{C,F}} = 28.7$  Hz), 40.11, 37.88, 21.63.

470 MHz  $^{19}\text{F}$  NMR ( $\text{CDCl}_3$ )  $\delta$ (ppm): -67 (t,  $J_{\text{F,H}} = 9.7$  Hz,  $\text{CF}_3$ ).

### Compound **3b**<sup>21</sup>

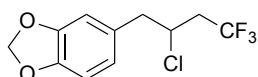

400 MHz  $^1\text{H}$  NMR ( $\text{CDCl}_3$ )  $\delta$ (ppm): 6.77 (d,  $J = 7.9$  Hz, 1H, Ar), 6.71 (d,  $J = 1.5$  Hz, 1H, Ar), 6.66 (dd,  $J = 7.9, 1.7$  Hz, 1H, Ar), 5.96 (s, 2H,  $\text{CH}_2$ ), 4.28-4.21 (m, 1H, CH), 3.02 (d,  $J = 6.9$  Hz, 2H,  $\text{CH}_2$ ), 2.62-2.49 (m, 2H,  $\text{CH}_2$ ).

100 MHz  $^{13}\text{C}$  NMR( $\text{CDCl}_3$ )  $\delta$ (ppm): 148.00, 147.01, 130.03, 125.48 (q,  $J_{\text{C,F}} = 277.5$  Hz), 122.75, 109.81, 108.53, 101.25, 54.32 (q,  $J_{\text{C,F}} = 3.0$  Hz), 44.25, 41.34 (q,  $J_{\text{C,F}} = 28.7$  Hz).

376 MHz  $^{19}\text{F}$  NMR ( $\text{CDCl}_3$ )  $\delta$ (ppm): -66 (t,  $J_{\text{F,H}} = 10.1$  Hz,  $\text{CF}_3$ ).

### Compound 3c<sup>22</sup>

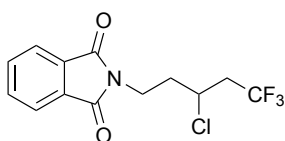

400 MHz  $^1\text{H}$  NMR ( $\text{CDCl}_3$ )  $\delta$ (ppm): 7.87-7.84 (m, 2H, Ar), 7.76-7.71 (m, 2H, Ar), 4.18-4.15 (m, 1H, CH), 3.96-3.85 (m, 2H,  $\text{CH}_2$ ), 2.69-2.59 (m, 2H,  $\text{CH}_2$ ), 2.29-2.25 (m, 1H,  $\text{CH}_2$ ), 2.17-2.11 (m, 1H,  $\text{CH}_2$ ).

100 MHz  $^{13}\text{C}$ -NMR( $\text{CDCl}_3$ )  $\delta$ (ppm): 168.29, 134.29, 132.11, 123.78 (q,  $J_{\text{C,F}} = 277.7$  Hz), 123.56, 51.49 (q,  $J_{\text{C,F}} = 3.3$  Hz), 42.40 (q,  $J_{\text{C,F}} = 28.9$  Hz), 36.59, 35.18.

376 MHz  $^{19}\text{F}$ -NMR ( $\text{CDCl}_3$ )  $\delta$ (ppm): -67 (t,  $J_{\text{F,H}} = 10.2$  Hz,  $\text{CF}_3$ ).

HR-APCI-FT-ICR-MS calcd for  $\text{C}_{13}\text{H}_{11}\text{ClF}_3\text{NO}_2$   $[\text{M}]^+$ : 306.0503. Found: 306.0502.

### Compound 3d<sup>21</sup>

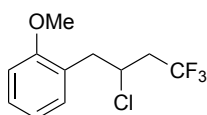

500 MHz  $^1\text{H}$  NMR ( $\text{CDCl}_3$ )  $\delta$ (ppm): 7.30-7.26 (m, 1H, Ar), 7.15 (d,  $J = 7.3$  Hz, 1H, Ar), 6.92 (tt,  $J = 7.5, 1.4$  Hz, 1H, Ar), 6.88 (d,  $J = 8.1$  Hz, 1H, Ar), 4.45 (p,  $J = 6.6$  Hz, 1H, CH), 3.84 (d,  $J = 1.6$  Hz, 3H,  $\text{CH}_3$ ), 3.15 (dd,  $J = 13.6, 6.5$  Hz, 1H,  $\text{CH}_2$ ), 3.07 (dd,  $J = 13.6, 6.5$  Hz, 1H,  $\text{CH}_2$ ), 2.59-2.52 (m, 2H,  $\text{CH}_2$ ).

100 MHz  $^{13}\text{C}$  NMR( $\text{CDCl}_3$ )  $\delta$ (ppm): 157.64, 131.66, 128.93, 125.66 (q,  $J_{\text{C,F}} = 277.5$  Hz), 124.96, 120.66, 110.61, 55.37, 53.07 (q,  $J_{\text{C,F}} = 3.1$  Hz), 41.65 (q,  $J_{\text{C,F}} = 28.6$  Hz), 40.13.

470 MHz  $^{19}\text{F}$  NMR ( $\text{CDCl}_3$ )  $\delta$ (ppm): -67 (t,  $J_{\text{F,H}} = 10.2$  Hz,  $\text{CF}_3$ ).

### Compound 3e<sup>23</sup>

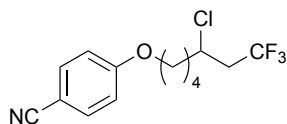

400 MHz  $^1\text{H}$  NMR ( $\text{CDCl}_3$ )  $\delta$ (ppm): 7.58 (d,  $J = 8.9$  Hz, 2H, Ar), 6.93 (d,  $J = 8.9$  Hz, 2H, Ar), 4.16-4.14 (m, 1H, CH), 4.02 (t,  $J = 6.1$  Hz, 2H,  $\text{CH}_2$ ), 2.66-2.53 (m, 2H,  $\text{CH}_2$ ), 1.94-1.64 (m, 6H,  $\text{CH}_2 \times 3$ ).

100 MHz  $^{13}\text{C}$ -NMR( $\text{CDCl}_3$ )  $\delta$ (ppm): 162.32, 134.10, 125.32(q,  $J_{\text{C,F}} = 277.6$  Hz), 119.34, 115.26, 104.01, 67.99, 54.01 (q,  $J_{\text{C,F}} = 3.2$  Hz), 42.53 (q,  $J_{\text{C,F}} = 28.5$  Hz), 37.70, 28.36, 22.76.

376 MHz  $^{19}\text{F}$  NMR ( $\text{CDCl}_3$ )  $\delta$ (ppm): -67 (t,  $J_{\text{F,H}} = 10.3$  Hz,  $\text{CF}_3$ ).

HR-MALDI-FT-ICR-MS calcd for  $\text{C}_{14}\text{H}_{15}\text{ClF}_3\text{NO}$   $[\text{M}]^+$ : 306.0867. Found: 306.0871.

### Compound 3f

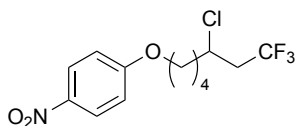

400 MHz  $^1\text{H}$  NMR ( $\text{CDCl}_3$ )  $\delta$ (ppm): 8.20 (d,  $J = 9.3$  Hz, 2H, Ar), 6.94 (d,  $J = 9.3$  Hz, 2H, Ar), 4.16-4.14 (m, 1H, CH), 4.08 (t,  $J = 6.1$  Hz, 2H,  $\text{CH}_2$ ), 2.67-2.54 (m, 2H,  $\text{CH}_2$ ), 1.95-1.65 (m, 6H,  $\text{CH}_2 \times 3$ ).

100 MHz  $^{13}\text{C}$ -NMR( $\text{CDCl}_3$ )  $\delta$ (ppm): 164.10, 141.60, 126.05, 125.34 (q,  $J_{\text{C,F}} = 277.6$  Hz), 114.51, 68.48, 54.02 (q,  $J_{\text{C,F}} = 3.3$  Hz), 42.56(q,  $J_{\text{C,F}} = 28.5$  Hz), 37.71, 28.39, 22.77.

376 MHz  $^{19}\text{F}$ -NMR ( $\text{CDCl}_3$ )  $\delta$ (ppm): -67 (t,  $J_{\text{F,H}} = 10.1$  Hz,  $\text{CF}_3$ ).

HR-MALDI-FT-ICR-MS calcd for  $\text{C}_{13}\text{H}_{15}\text{ClF}_3\text{NO}_3$   $[\text{M}]^+$ : 326.0765. Found: 326.0769.

### Compound 3g

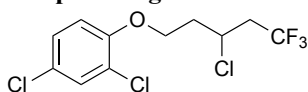

400 MHz  $^1\text{H}$  NMR ( $\text{CDCl}_3$ )  $\delta$ (ppm): 7.40 (d,  $J = 2.5$  Hz, 1H, Ar), 7.22 (dd,  $J = 8.8, 2.5$  Hz, 1H, Ar), 6.89 (d,  $J = 8.8$  Hz, 1H, Ar) 4.70-4.42 (m, 1H, CH), 4.37-4.07 (m, 2H,  $\text{CH}_2$ ), 2.97-2.62 (m, 2H,  $\text{CH}_2$ ), 2.56-2.36 (m, 1H,  $\text{CH}_2$ ), 2.29-2.00 (m, 1H,  $\text{CH}_2$ ).

100 MHz  $^{13}\text{C}$ -NMR( $\text{CDCl}_3$ )  $\delta$ (ppm): 153.01, 130.23, 127.79, 126.45, 125.30 (q,  $J_{\text{C,F}} = 277.6$  Hz), 124.05, 114.36, 65.60, 50.98 (q,  $J_{\text{C,F}} = 28.7$  Hz), 37.52.

376MHz  $^{19}\text{F}$ -NMR ( $\text{CDCl}_3$ )  $\delta$ (ppm): -67 (t,  $J_{\text{F,H}} = 10.2$  Hz,  $\text{CF}_3$ ).

HR-APCI-FT-ICR-MS calcd for  $C_{11}H_{10}Cl_3F_3O$   $[M]^+$ : 319.9744. Found: 319.9744.

### Compound 3h<sup>21</sup>

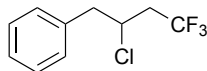

400 MHz  $^1H$ -NMR ( $CDCl_3$ )  $\delta$ (ppm): 7.37-7.21 (m, 5H, Ar), 4.36-4.30 (m, 1H, CH), 3.11 (d, 2H,  $CH_2$ ), 2.62-2.53 (m, 2H,  $CH_2$ ).

100 MHz  $^{13}C$ -NMR( $CDCl_3$ )  $\delta$ (ppm): 136.40, 129.55, 128.83, 127.50, 125.47 (q,  $J_{C,F} = 278.76$  Hz), 54.16 (q,  $J_{C,F} = 3.03$  Hz), 44.58, 41.49 (q,  $J_{C,F} = 28.28$  Hz).

376 MHz  $^{19}F$ -NMR ( $CDCl_3$ )  $\delta$ (ppm): -67 (t,  $J_{F,H} = 11.3$  Hz,  $CF_3$ ).

### Compound 3i

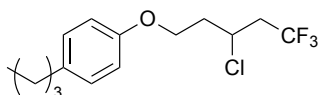

400 MHz  $^1H$ -NMR ( $CDCl_3$ )  $\delta$ (ppm): 7.10 (d,  $J = 8.7$  Hz, 2H, Ar), 6.82 (d,  $J = 8.6$  Hz, 2H, Ar), 4.45-4.43 (m, 1H, CH), 4.18-4.12 (m, 2H,  $CH_2$ ), 2.72-2.63 (m, 2H,  $CH_2$ ), 2.55 (t,  $J = 7.7$  Hz, 2H,  $CH_2$ ), 2.37-2.34 (m, 1H,  $CH_2$ ), 2.15-2.12 (m, 1H,  $CH_2$ ), 1.60-1.53 (m, 2H,  $CH_2$ ), 1.37-1.32 (m, 2H,  $CH_2$ ), 0.92 (t,  $J = 7.3$  Hz, 3H,  $CH_3$ ).

100 MHz  $^{13}C$ -NMR( $CDCl_3$ )  $\delta$ (ppm): 156.63, 135.72, 129.49, 126.74 (q,  $J_{C,F} = 277.7$  Hz), 114.48, 64.05, 51.16 (q,  $J_{C,F} = 3.3$  Hz), 42.69 (q,  $J_{C,F} = 28.6$  Hz), 37.88, 34.88, 34.03, 22.44, 14.10.

376 MHz  $^{19}F$ -NMR ( $CDCl_3$ )  $\delta$ (ppm): -67 (t,  $J_{F,H} = 10.1$  Hz,  $CF_3$ ).

HR-MALDI-FT-ICR-MS calcd for  $C_{15}H_{20}ClF_3O$   $[M]^+$ : 308.1149. Found: 308.1151.

### Compound 3j

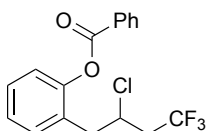

500 MHz  $^1H$ -NMR ( $CDCl_3$ )  $\delta$ (ppm): 8.21-8.19 (m, 2H, Ar), 7.69-7.66 (m, 1H, Ar), 7.56-7.53 (m, 1H, Ar), 7.40-7.34 (m, 2H, Ar), 7.30-7.26 (m, 1H, Ar), 7.23-7.21 (m, 1H, Ar), 4.41-4.35 (m, 1H, CH), 3.16 (dd,  $J = 14.4, 5.9$  Hz, 1H,  $CH_2$ ), 3.04 (dd,  $J = 14.3, 8.3$  Hz, 1H,  $CH_2$ ), 2.60-2.56 (m, 2H,  $CH_2$ ).

100 MHz  $^{13}\text{C}$  NMR( $\text{CDCl}_3$ )  $\delta$ (ppm): 164.95, 149.49, 133.98, 131.57, 130.16, 128.99, 128.84, 128.80, 128.79, 126.34, 125.20 (q,  $J_{\text{C,F}} = 277.6$  Hz), 122.94, 53.10 (q,  $J_{\text{C,F}} = 3.1$  Hz), 41.86 (q,  $J_{\text{C,F}} = 28.7$  Hz), 39.38.

470 MHz  $^{19}\text{F}$  NMR ( $\text{CDCl}_3$ )  $\delta$ (ppm): -67 (t,  $J_{\text{F,H}} = 9.5$  Hz,  $\text{CF}_3$ ).

HR-MALDI-FT-ICR-MS calcd for  $\text{C}_{17}\text{H}_{14}\text{ClF}_3\text{O}_2$   $[\text{M}]^+$  : 343.0707. Found: 343.0711.

### Compound 3k

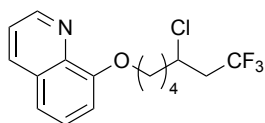

400 MHz  $^1\text{H}$  NMR ( $\text{CDCl}_3$ )  $\delta$ (ppm): 8.95 (dd,  $J = 4.2, 1.8$  Hz, 1H, Ar), 8.13 (dd,  $J = 8.3, 1.8$  Hz, 1H, Ar), 7.50-7.36 (m, 3H, Ar), 7.06 (dd,  $J = 7.6, 1.4$  Hz, 1H, Ar), 4.27 (t,  $J = 6.7$  Hz, 2H,  $\text{CH}_2$ ), 4.22-4.11 (m, 1H, CH), 2.71-2.49 (m, 2H,  $\text{CH}_2$ ), 2.17-1.66 (m, 6H,  $\text{CH}_2 \times 3$ ).

100 MHz  $^{13}\text{C}$  NMR( $\text{CDCl}_3$ )  $\delta$ (ppm): 154.75, 149.40, 140.39, 136.11, 129.64, 126.79, 125.40 (q,  $J_{\text{C,F}} = 277.7$  Hz), 121.70, 119.76, 108.87, 68.66, 54.09 (q,  $J_{\text{C,F}} = 3.3$  Hz), 42.53 (q,  $J_{\text{C,F}} = 28.4$  Hz), 37.93, 28.33, 22.98.

376 MHz  $^{19}\text{F}$  NMR ( $\text{CDCl}_3$ )  $\delta$ (ppm): -67 (t,  $J_{\text{F,H}} = 10.4$  Hz,  $\text{CF}_3$ ).

HR-MALDI-FT-ICR-MS calcd for  $\text{C}_{16}\text{H}_{17}\text{ClF}_3\text{NO}$   $[\text{M}]^+$  : 332.1024. Found: 332.1025.

**Compound 3l<sup>24</sup>**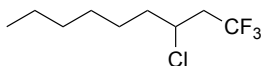

400 MHz <sup>1</sup>H NMR (CDCl<sub>3</sub>) δ(ppm): 4.14-4.08 (m, 1H, CH), 2.62-2.53 (m, 2H, CH<sub>2</sub>), 1.83-1.73 (m, 2H, CH<sub>2</sub>), 1.55-1.42 (m, 8H, CH<sub>2</sub>×4) 0.91-0.88 (m, 3H, CH<sub>3</sub>).

376 MHz <sup>19</sup>F-NMR (CDCl<sub>3</sub>) δ(ppm): -67 (t, *J*<sub>F,H</sub> = 10.2 Hz, CF<sub>3</sub>).

**Compound 3m**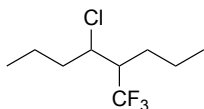

(*dr* 1 : 1.7)

400 MHz <sup>1</sup>H NMR (CDCl<sub>3</sub>) δ(ppm): 4.24-4.14 (m, 1H), 2.62-2.46 (m, 0.40H), 2.42-2.27 (m, 0.67H), 1.89-1.32 (m, 8H), 0.98-0.92 (m, 6H).

100 MHz <sup>13</sup>C NMR(CDCl<sub>3</sub>) δ(ppm): 127.30 (q, *J*<sub>C,F</sub> = 281.5 Hz), 125.68 (q, *J*<sub>C,F</sub> = 281.7 Hz), 59.87 (q, *J*<sub>C,F</sub> = 3.0 Hz), 59.08 (q, *J*<sub>C,F</sub> = 3.3 Hz), 49.46 (q, *J*<sub>C,F</sub> = 24.2 Hz), 48.45 (q, *J*<sub>C,F</sub> = 24.7 Hz), 38.59, 36.14 (d, *J*<sub>C,F</sub> = 1.6 Hz), 26.79 (q, *J*<sub>C,F</sub> = 1.8 Hz), 26.54 (q, *J*<sub>C,F</sub> = 2.0 Hz), 21.37, 21.10, 20.52, 20.25, 14.21, 14.05, 13.45, 13.44.

376 MHz <sup>19</sup>F NMR (CDCl<sub>3</sub>) δ(ppm): -69 (d, *J*<sub>F,H</sub> = 9.6 Hz, CF<sub>3</sub>), -70 (d, *J*<sub>F,H</sub> = 9.1 Hz, CF<sub>3</sub>).

HR-APCI-FT-ICR-MS calcd for C<sub>9</sub>H<sub>16</sub>ClF<sub>3</sub> [M+H]<sup>+</sup>: 217.0965. Found: 217.0990.

**Compound 3n<sup>21</sup>**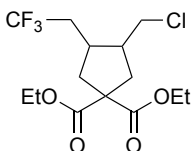

500 MHz <sup>1</sup>H NMR (CDCl<sub>3</sub>) δ(ppm): 4.20 (m, *J* = 7.2 Hz, 2H, CH<sub>2</sub>×2), 3.57-3.38 (m, 2H, CH×2), 2.72-2.42 (m, 4H, CH<sub>2</sub>×2), 2.41-1.95 (m, 1H, CH<sub>2</sub>+CH×2), 1.25 (t, *J* = 7.1 Hz, 3H, CH<sub>3</sub>), 1.25 (t, *J* = 7.1 Hz, 3H, CH<sub>3</sub>).

100 MHz <sup>13</sup>C-NMR(CDCl<sub>3</sub>) δ(ppm): 172.20, 172.11, 126.94 (q, *J*<sub>C,F</sub> = 277.1 Hz), 61.96, 61.92, 58.62, 44.43, 43.98, 38.61, 37.08, 35.56 (q, *J*<sub>C,F</sub> = 2.5 Hz), 33.37 (q, *J*<sub>C,F</sub> = 28.7 Hz), 14.10.



470 MHz  $^{19}\text{F}$ -NMR ( $\text{CDCl}_3$ )  $\delta(\text{ppm})$ : -67 (t,  $J_{\text{F,H}} = 10.5$  Hz,  $\text{CF}_3$ ).

### Compound 5

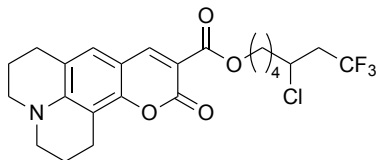

400 MHz  $^1\text{H}$  NMR ( $\text{CDCl}_3$ )  $\delta(\text{ppm})$ : 8.31 (s, 1H, Ar), 6.93 (s, 1H, Ar), 4.31 (t,  $J = 6.3$  Hz, 2H,  $\text{CH}_2$ ), 4.19-4.08 (m, 1H, CH), 3.33 (q,  $J = 6.3$  Hz, 4H,  $\text{CH}_2 \times 2$ ), 2.87 (t,  $J = 6.4$  Hz, 2H,  $\text{CH}_2$ ), 2.81-2.71 (m, 2H,  $\text{CH}_2$ ), 2.70-2.50 (m, 2H,  $\text{CH}_2$ ), 2.02-1.92 (m, 4H,  $\text{CH}_2 \times 2$ ), 1.88-1.69 (m, 4H,  $\text{CH}_2 \times 2$ ), 1.67-1.51 (m, 2H,  $\text{CH}_2$ ).

100 MHz  $^{13}\text{C}$  NMR( $\text{CDCl}_3$ )  $\delta(\text{ppm})$ : 164.77, 158.72, 153.61, 149.32, 148.69, 127.08, 125.40 (q,  $J_{\text{C,F}} = 277.6$  Hz), 119.31, 107.62, 107.36, 105.84, 64.53, 54.11 (q,  $J_{\text{C,F}} = 3.2$  Hz), 50.37, 49.98, 42.49 (q,  $J_{\text{C,F}} = 28.4$  Hz), 37.73, 28.07, 27.52, 22.73, 21.25, 20.27, 20.17.

470MHz  $^{19}\text{F}$  NMR ( $\text{CDCl}_3$ )  $\delta(\text{ppm})$ : -67 (t,  $J_{\text{F,H}} = 10.3$  Hz,  $\text{CF}_3$ ).

UV-vis( $\text{CHCl}_3$ ) ( $\epsilon \times 10^{-4}$ )  $\lambda_{\text{max}}$  nm: 438(3.8).

HR-FAB-MS calcd for  $\text{C}_{23}\text{H}_{25}\text{ClF}_3\text{NO}_4$   $[\text{M}]^+$ : 471.1419. Found: 471.1415.

## Copies of the NMR Spectra of Studied Compounds

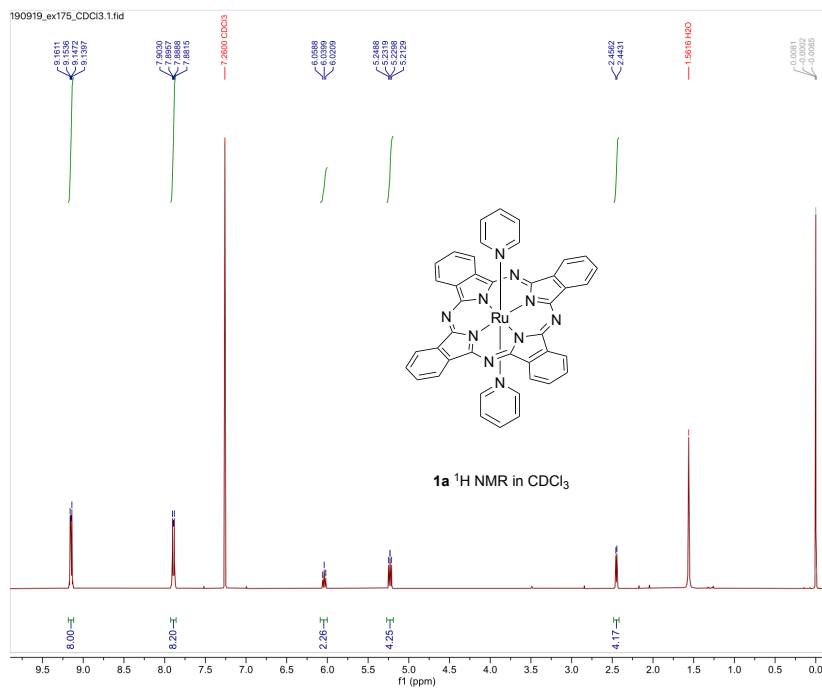

| パラ          | 値                                                                                              |
|-------------|------------------------------------------------------------------------------------------------|
| メータ         |                                                                                                |
| 1 データ       | C:/ Users/ furuyama/ Documents/ Personaldata/ ishikawa/ NMR/ 生data/ 190919_ex175_CDCI3/ 1/ fid |
| 2 タイトル      | 190919_ex175_CDCI3.1.fid                                                                       |
| 3 コメント      |                                                                                                |
| 4 オリジナル     | Bruker BioSpin GmbH                                                                            |
| 5 オペレーター    | nmsu                                                                                           |
| 6 サイト       |                                                                                                |
| 7 装置        | Avance                                                                                         |
| 8 作成者       |                                                                                                |
| 9 溶媒        | CDCl3                                                                                          |
| 10 温度       | 298.1                                                                                          |
| 11 パルスシーケンス | zg30                                                                                           |
| 12 実験       | 1D                                                                                             |
| 13 プロンプ     | Z116098_0842 (PA BBO 400S1 BBF-H-D-05 Z SP)                                                    |
| 14 スキャン数    | 16                                                                                             |
| 15 レシーブゲイン  | 101.0                                                                                          |

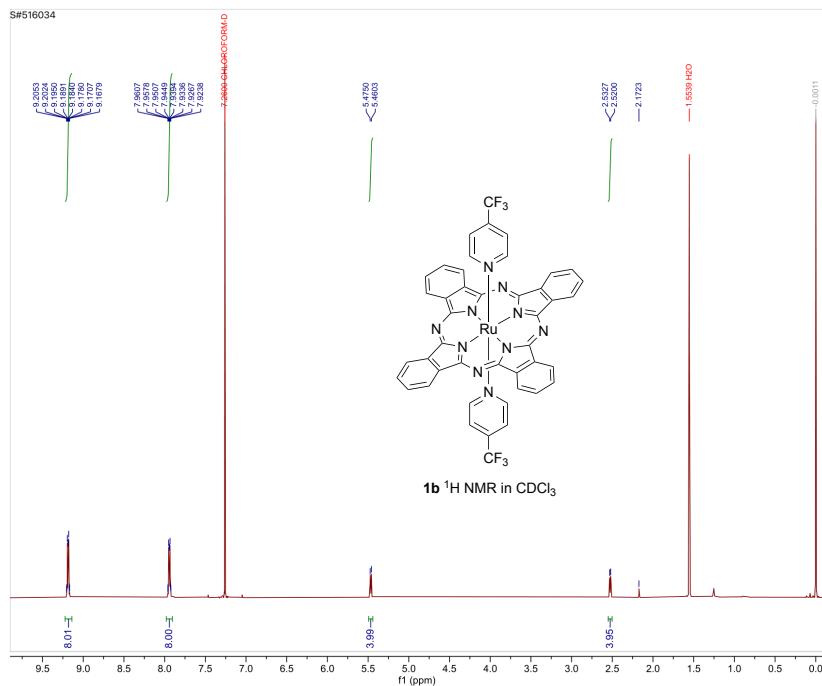

| パラ          | 値                                                                                            |
|-------------|----------------------------------------------------------------------------------------------|
| メータ         |                                                                                              |
| 1 データ       | C:/ Users/ furuyama/ Documents/ Personaldata/ ishikawa/ NMR/ 生data/ 191002_ex176_CDCI3-1.jdf |
| 2 タイトル      | S#516034                                                                                     |
| 3 コメント      |                                                                                              |
| 4 オリジナル     | JEOL                                                                                         |
| 5 オペレーター    |                                                                                              |
| 6 サイト       |                                                                                              |
| 7 装置        | ECA 500                                                                                      |
| 8 作成者       | delta                                                                                        |
| 9 溶媒        | CHLOROFORM-D                                                                                 |
| 10 温度       | 21.5                                                                                         |
| 11 パルスシーケンス | single_pulse.ex2                                                                             |
| 12 実験       | 1D                                                                                           |
| 13 プロンプ     | 2756                                                                                         |
| 14 スキャン数    | 8                                                                                            |
| 15 レシーブゲイン  | 58.0                                                                                         |

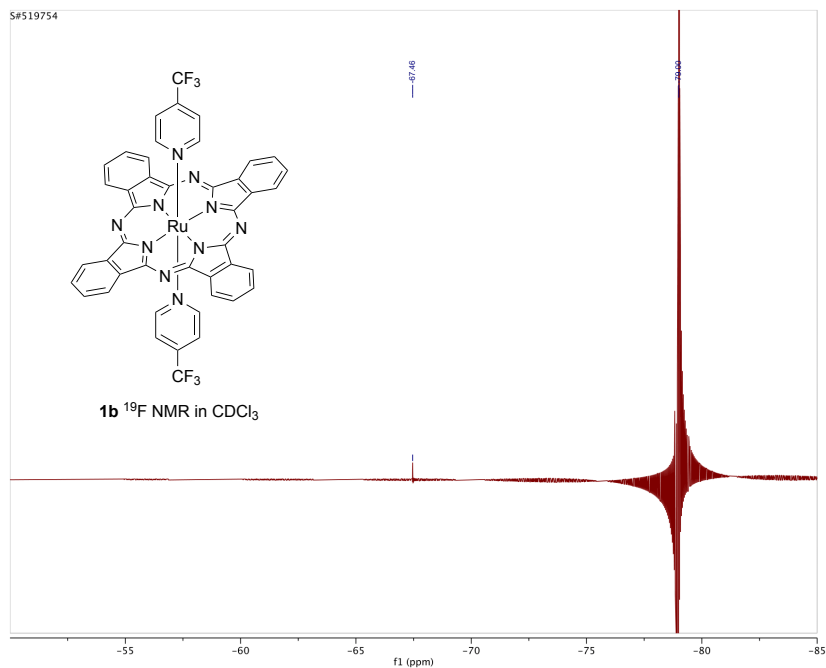

| パラ       | 値                                                                     |
|----------|-----------------------------------------------------------------------|
| メータ      |                                                                       |
| データ      | C:/Users/furuyama/                                                    |
| ファイル名    | Documents/Personaldata/ishikawa/NMR/生データ/191002_ex176_CDCl3_19F-1.jdf |
| タイトル     | S#519754                                                              |
| コメント     |                                                                       |
| オリジナル    | JEOL                                                                  |
| メーカー     |                                                                       |
| サイト      |                                                                       |
| 装置       | ECA 500                                                               |
| 作成者      | delta                                                                 |
| 溶媒       | CHLOROFORM-D                                                          |
| 温度       | 21.4                                                                  |
| パルスシーケンス | single_pulse.ex2                                                      |
| 実験 1D    |                                                                       |
| プロブ      | 2756                                                                  |

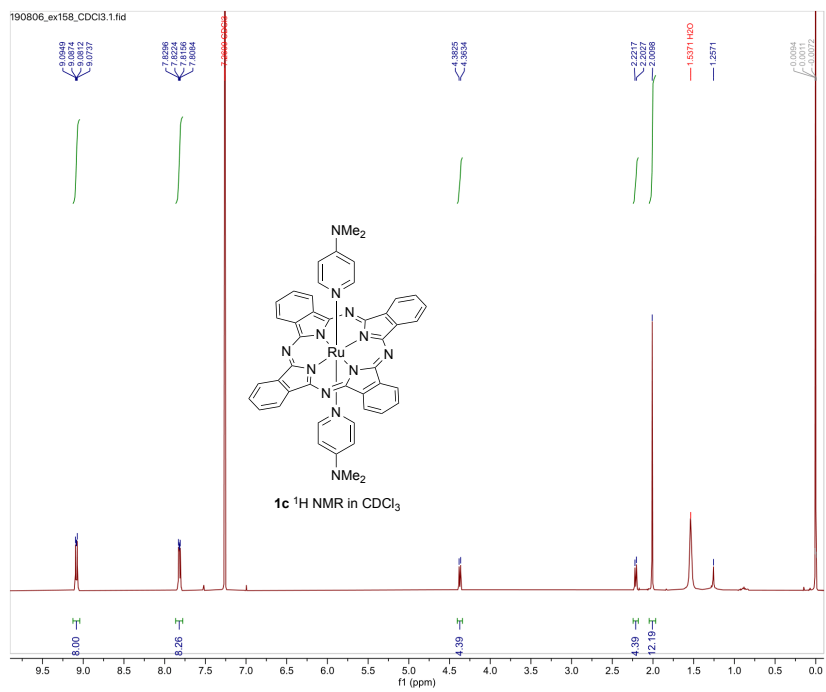

| パラ       | 値                                           |
|----------|---------------------------------------------|
| メータ      |                                             |
| データ      | E:/NMR/                                     |
| ファイル名    | 190806_ex158_CDCl3/1/fid                    |
| タイトル     | 190806_ex158_CDCl3.1.fid                    |
| コメント     |                                             |
| オリジナル    | Bruker BioSpin GmbH                         |
| メーカー     | nmsu                                        |
| サイト      |                                             |
| 装置       | Avance                                      |
| 作成者      |                                             |
| 溶媒       | CDCl3                                       |
| 温度       | 301.1                                       |
| パルスシーケンス | zg30                                        |
| 実験 1D    |                                             |
| プロブ      | Z116098_0842 (PA BBO 400S1 BBF-H-D-05 Z SP) |
| スキャン数    | 16                                          |
| レシーバーゲイン | 101.0                                       |
| プロブ      |                                             |

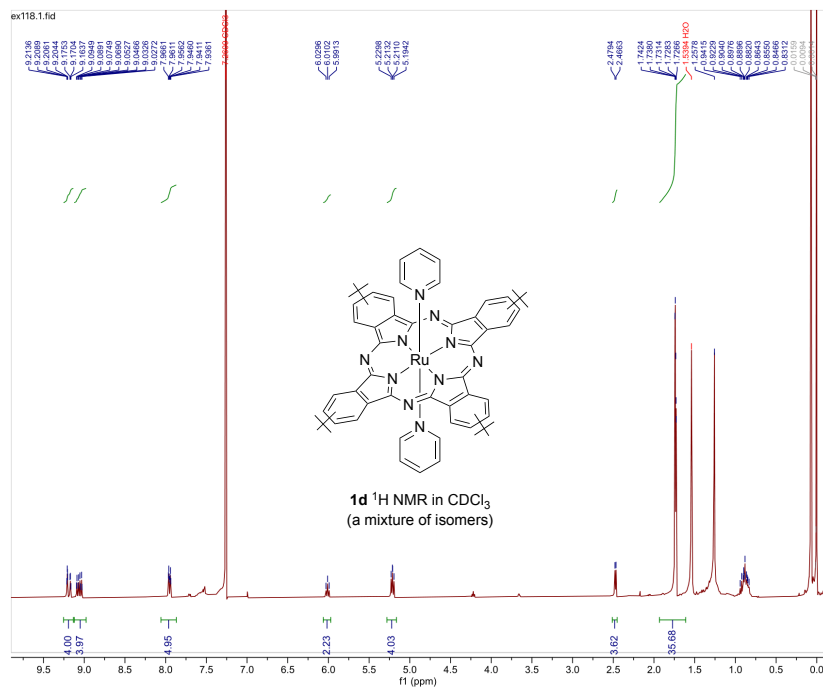

| パラメータ       | 値                                           |
|-------------|---------------------------------------------|
| 1 データファイル名  | E:/ NMR/ ex118/ 1/ fid                      |
| 2 タイトル      | ex118.1.fid                                 |
| 3 コメント      |                                             |
| 4 オリジン      | Bruker BioSpin GmbH                         |
| 5 オーナー      | nmrsu                                       |
| 6 サイト       |                                             |
| 7 装置        | Avance                                      |
| 8 作成者       |                                             |
| 9 溶媒        | CDCl <sub>3</sub>                           |
| 10 温度       | 301.1                                       |
| 11 パルスシーケンス | zg30                                        |
| 12 実験       | 1D                                          |
| 13 プロープ     | Z116098_0842 (PA BBO 400S1 BBF-H-D-05 Z SP) |
| 14 スキャン数    | 32                                          |
| 15 レシーバーゲイン | 101.0                                       |
| 16 緩和時間     | 1.0000                                      |
| 17 パルス幅     | 10.0000                                     |
| 18 固定周波数    |                                             |

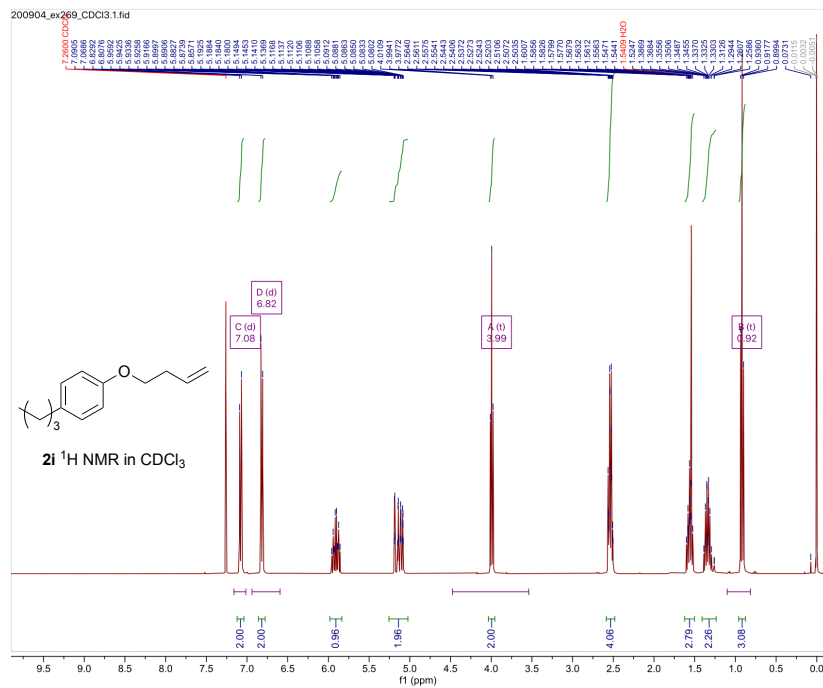

| Parameter                  | Value                                                                                               |
|----------------------------|-----------------------------------------------------------------------------------------------------|
| 1 Data File Name           | C:/ Users/ furuyama/ Documents/ Personaldata/ IshikawaYuta/ NMR/ 生data/ 200904_ex269_C DCI3/ 1/ fid |
| 2 Title                    | 200904_ex269_C DCI3.1.fid                                                                           |
| 3 Comment                  |                                                                                                     |
| 4 Origin                   | Bruker BioSpin GmbH                                                                                 |
| 5 Owner                    | nmrsu                                                                                               |
| 6 Site                     |                                                                                                     |
| 7 Instrument               | Avance                                                                                              |
| 8 Author                   |                                                                                                     |
| 9 Solvent                  | CDCl <sub>3</sub>                                                                                   |
| 10 Temperature             | 298.1                                                                                               |
| 11 Pulse Sequence          | zg30                                                                                                |
| 12 Experiment              | 1D                                                                                                  |
| 13 Probe                   | Z116098_0842 (PA BBO 400S1 BBF-H-D-05 Z SP)                                                         |
| 14 Number of Scans         | 16                                                                                                  |
| 15 Receiver Gain           | 101.0                                                                                               |
| 16 Relaxation Delay        | 1.0000                                                                                              |
| 17 Pulse Width             | 10.0000                                                                                             |
| 18 Presaturation Frequency |                                                                                                     |
| 19 Acquisition Time        | 3.9977                                                                                              |
| 20 Acquisition Date        | 2020-09-04T17:5 3:59                                                                                |
| 21 Modification Date       | 2020-09-04T17:4 8:46                                                                                |

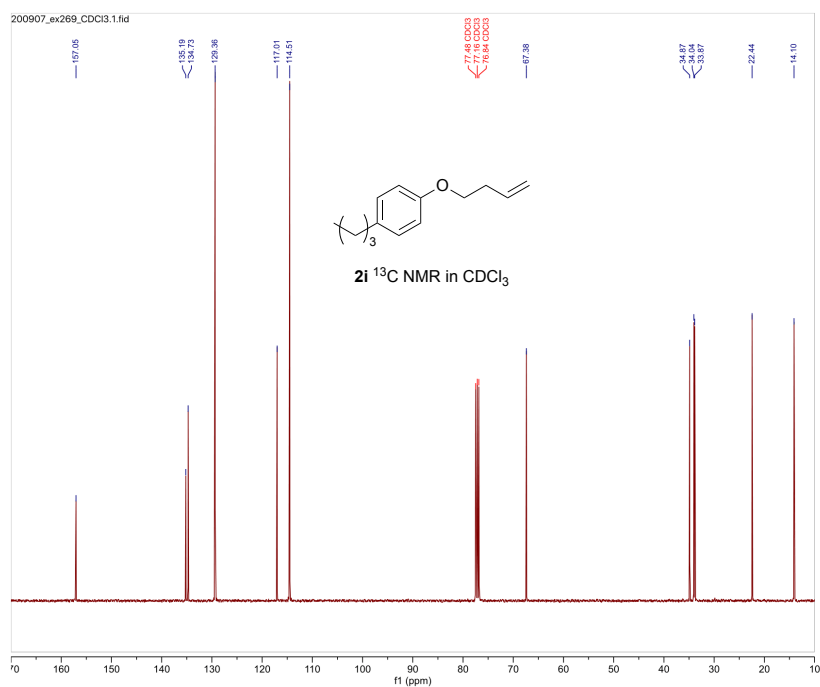

| Parameter                     | Value                                                                                                                    |
|-------------------------------|--------------------------------------------------------------------------------------------------------------------------|
| 1 Data File Name              | C:/ Users/<br>furuyama/<br>Documents/<br>Personaldata/<br>IshikawaYuta/<br>NMR/ 生data/<br>200907_ex269_C<br>DCI3/ 1/ fid |
| 2 Title                       | 200907_ex269_C<br>DCI3.1.fid                                                                                             |
| 3 Comment                     |                                                                                                                          |
| 4 Origin                      | Bruker BioSpin<br>GmbH                                                                                                   |
| 5 Owner                       | nmrsm                                                                                                                    |
| 6 Site                        |                                                                                                                          |
| 7 Instrument                  | Avance                                                                                                                   |
| 8 Author                      |                                                                                                                          |
| 9 Solvent                     | CDCl3                                                                                                                    |
| 10 Temperature                | 298.1                                                                                                                    |
| 11 Pulse Sequence             | zgpg30                                                                                                                   |
| 12 Experiment                 | 1D                                                                                                                       |
| 13 Probe                      | Z116098_0842<br>(PA BBO 400S1<br>BBF-H-D-05 Z SP)                                                                        |
| 14 Number of Scans            | 1024                                                                                                                     |
| 15 Receiver Gain              | 36.2                                                                                                                     |
| 16 Relaxation Delay           | 2.0000                                                                                                                   |
| 17 Pulse Width                | 10.0000                                                                                                                  |
| 18 Presaturation<br>Frequency |                                                                                                                          |
| 19 Acquisition Time           | 1.3763                                                                                                                   |
| 20 Acquisition Date           | 2020-09-07T15:5<br>5:18                                                                                                  |

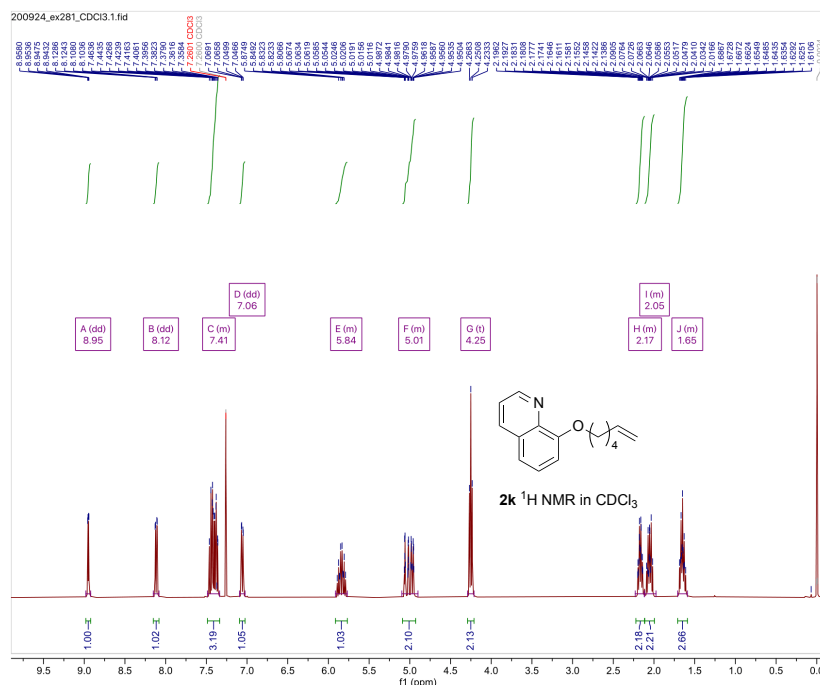

$^1\text{H}$  NMR (400 MHz, Chloroform- $d$ )  $\delta$  8.95 (dd,  $J = 4.2, 1.8$  Hz, 1H), 8.12 (dd,  $J = 8.3, 1.7$  Hz, 1H), 7.49 – 7.34 (m, 3H), 7.06 (dd,  $J = 7.7, 1.3$  Hz, 1H), 5.91 – 5.77 (m, 1H), 5.10 – 4.90 (m, 2H), 4.25 (t,  $J = 7.0$  Hz, 2H), 2.23 – 2.12 (m, 2H), 2.12 – 1.97 (m, 2H), 1.71 – 1.59 (m, 2H).

| Parameter                     | Value                                                                                                                    |
|-------------------------------|--------------------------------------------------------------------------------------------------------------------------|
| 1 Data File Name              | C:/ Users/<br>furuyama/<br>Documents/<br>Personaldata/<br>IshikawaYuta/<br>NMR/ 生data/<br>200924_ex281_C<br>DCI3/ 1/ fid |
| 2 Title                       | 200924_ex281_C<br>DCI3.1.fid                                                                                             |
| 3 Comment                     |                                                                                                                          |
| 4 Origin                      | Bruker BioSpin<br>GmbH                                                                                                   |
| 5 Owner                       | nmrsm                                                                                                                    |
| 6 Site                        |                                                                                                                          |
| 7 Instrument                  | Avance                                                                                                                   |
| 8 Author                      |                                                                                                                          |
| 9 Solvent                     | CDCl3                                                                                                                    |
| 10 Temperature                | 298.1                                                                                                                    |
| 11 Pulse Sequence             | zg30                                                                                                                     |
| 12 Experiment                 | 1D                                                                                                                       |
| 13 Probe                      | Z116098_0842<br>(PA BBO 400S1<br>BBF-H-D-05 Z SP)                                                                        |
| 14 Number of Scans            | 16                                                                                                                       |
| 15 Receiver Gain              | 101.0                                                                                                                    |
| 16 Relaxation Delay           | 1.0000                                                                                                                   |
| 17 Pulse Width                | 10.0000                                                                                                                  |
| 18 Presaturation<br>Frequency |                                                                                                                          |
| 19 Acquisition Time           | 3.9977                                                                                                                   |
| 20 Acquisition Date           | 2020-09-24T15:2<br>5:08                                                                                                  |
| 21 Modification Date          | 2020-09-24T15:2<br>3:56                                                                                                  |

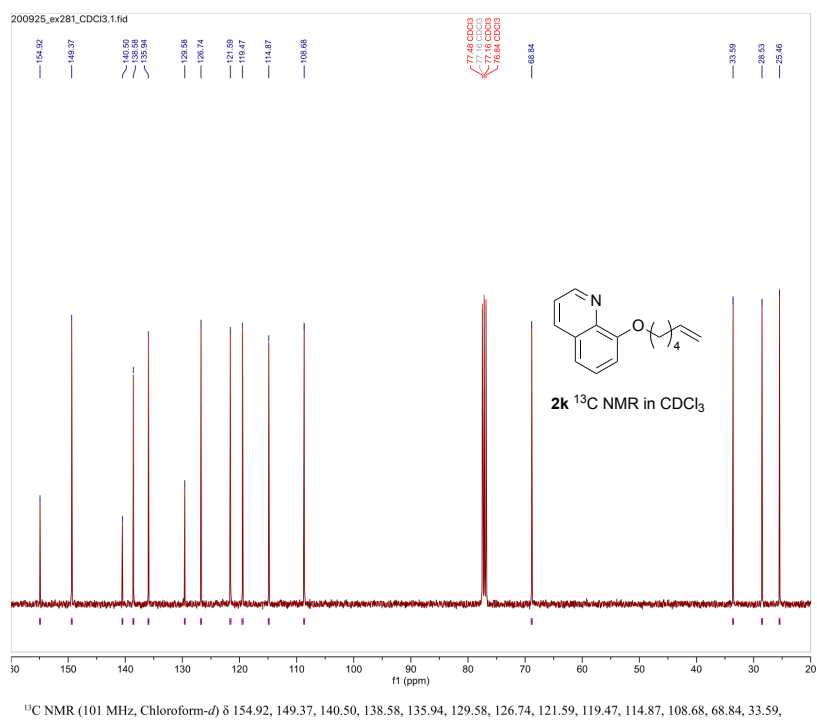

| Parameter                  | Value                                                                                     |
|----------------------------|-------------------------------------------------------------------------------------------|
| 1 Data File Name           | C:/Users/furuyama/Documents/Personaldata/IshikawaYuta/NMR/生data/200925_ex281_CDCl3/1/ fid |
| 2 Title                    | 200925_ex281_CDCl3.1.fid                                                                  |
| 3 Comment                  |                                                                                           |
| 4 Origin                   | Bruker BioSpin GmbH                                                                       |
| 5 Owner                    | nmsru                                                                                     |
| 6 Site                     |                                                                                           |
| 7 Instrument               | Avance                                                                                    |
| 8 Author                   |                                                                                           |
| 9 Solvent                  | CDCl3                                                                                     |
| 10 Temperature             | 298.1                                                                                     |
| 11 Pulse Sequence          | zgpg30                                                                                    |
| 12 Experiment              | 1D                                                                                        |
| 13 Probe                   | Z116098_0842 (PA BBO 400S1 BBF-H-D-05 Z SP)                                               |
| 14 Number of Scans         | 329                                                                                       |
| 15 Receiver Gain           | 36.5                                                                                      |
| 16 Relaxation Delay        | 2.0000                                                                                    |
| 17 Pulse Width             | 10.0000                                                                                   |
| 18 Presaturation Frequency |                                                                                           |
| 19 Acquisition Time        | 1.3763                                                                                    |
| 20 Acquisition Date        | 2020-09-25T15:56:47                                                                       |

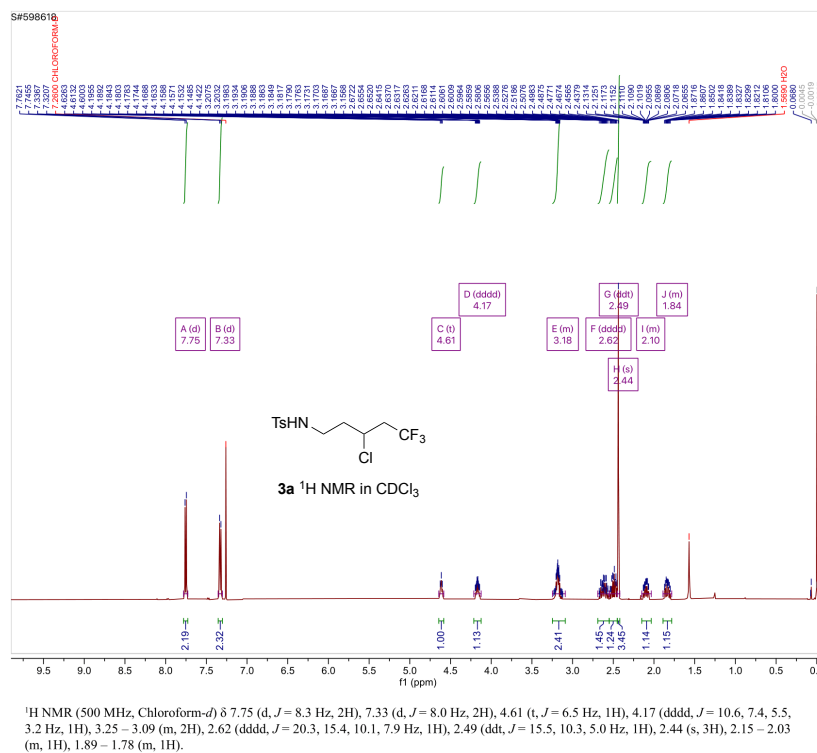

| Parameter                  | Value                                                                                    |
|----------------------------|------------------------------------------------------------------------------------------|
| 1 Data File Name           | C:/Users/furuyama/Documents/Personaldata/IshikawaYuta/NMR/生data/200824_ex261_CDCl3-1.jdf |
| 2 Title                    | S#598618                                                                                 |
| 3 Comment                  |                                                                                          |
| 4 Origin                   | JEOL                                                                                     |
| 5 Owner                    |                                                                                          |
| 6 Site                     |                                                                                          |
| 7 Instrument               | ECA 500                                                                                  |
| 8 Author                   | delta                                                                                    |
| 9 Solvent                  | CHLOROFORM-D                                                                             |
| 10 Temperature             | 22.0                                                                                     |
| 11 Pulse Sequence          | single_pulse.ex2                                                                         |
| 12 Experiment              | 1D                                                                                       |
| 13 Probe                   | 2756                                                                                     |
| 14 Number of Scans         | 8                                                                                        |
| 15 Receiver Gain           | 50.0                                                                                     |
| 16 Relaxation Delay        | 5.0000                                                                                   |
| 17 Pulse Width             | 5.7000                                                                                   |
| 18 Presaturation Frequency |                                                                                          |
| 19 Acquisition Time        | 1.7459                                                                                   |
| 20 Acquisition Date        | 2020-08-24T16:19:50                                                                      |
| 21 Modification Date       | 2020-08-24T16:39:01                                                                      |
| 22 Class                   |                                                                                          |
| 23 Spectrometer Frequency  | 500.16                                                                                   |

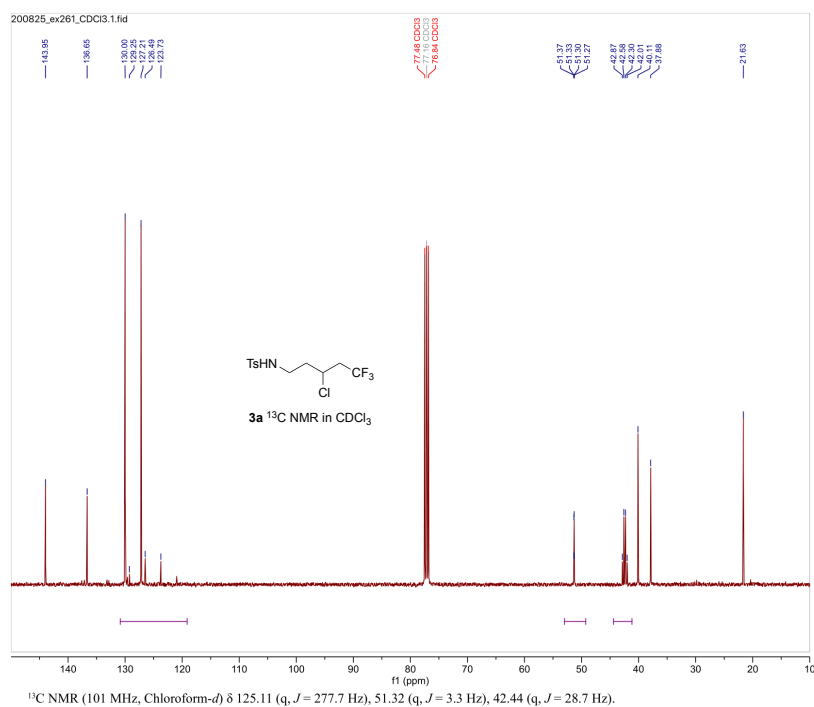

| Parameter                  | Value                                                                                               |
|----------------------------|-----------------------------------------------------------------------------------------------------|
| 1 Data File Name           | C:/ Users/ furuyama/ Documents/ Personaldata/ IshikawaYuta/ NMR/ 生data/ 200825_ex261_C DCI3/ 1/ fid |
| 2 Title                    | 200825_ex261_C DCI3.1.fid                                                                           |
| 3 Comment                  |                                                                                                     |
| 4 Origin                   | Bruker BioSpin GmbH                                                                                 |
| 5 Owner                    | nmsru                                                                                               |
| 6 Site                     |                                                                                                     |
| 7 Instrument               | Avance                                                                                              |
| 8 Author                   |                                                                                                     |
| 9 Solvent                  | CDCl3                                                                                               |
| 10 Temperature             | 298.1                                                                                               |
| 11 Pulse Sequence          | zgpg30                                                                                              |
| 12 Experiment              | 1D                                                                                                  |
| 13 Probe                   | Z116098_0842 (PA BBO 400S1 BBF-H-D-05 Z SP)                                                         |
| 14 Number of Scans         | 1024                                                                                                |
| 15 Receiver Gain           | 36.2                                                                                                |
| 16 Relaxation Delay        | 2.0000                                                                                              |
| 17 Pulse Width             | 10.0000                                                                                             |
| 18 Presaturation Frequency |                                                                                                     |
| 19 Acquisition Time        | 1.3763                                                                                              |
| 20 Acquisition Date        | 2020-08-25T10:3 0:47                                                                                |

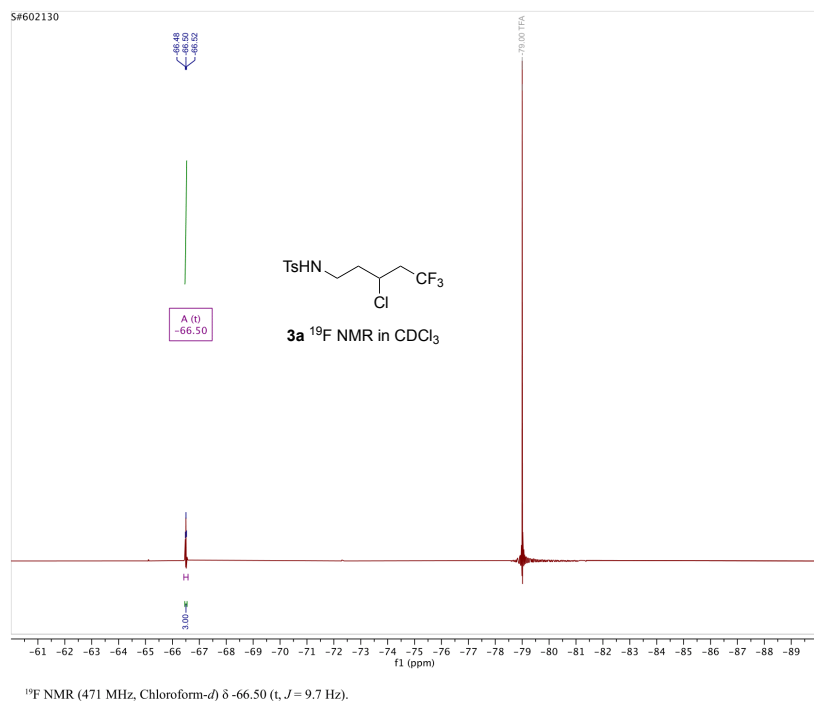

| Parameter                  | Value                                                                                             |
|----------------------------|---------------------------------------------------------------------------------------------------|
| 1 Data File Name           | C:/ Users/ furuyama/ Documents/ Personaldata/ IshikawaYuta/ NMR/ 生data/ 200824_ex261_CD Cl3-2.jdf |
| 2 Title                    | S#602130                                                                                          |
| 3 Comment                  |                                                                                                   |
| 4 Origin                   | JEOL                                                                                              |
| 5 Owner                    |                                                                                                   |
| 6 Site                     |                                                                                                   |
| 7 Instrument               | ECA 500                                                                                           |
| 8 Author                   | delta                                                                                             |
| 9 Solvent                  | CHLOROFORM-D                                                                                      |
| 10 Temperature             | 22.0                                                                                              |
| 11 Pulse Sequence          | single_pulse.ex2                                                                                  |
| 12 Experiment              | 1D                                                                                                |
| 13 Probe                   | 2756                                                                                              |
| 14 Number of Scans         | 4                                                                                                 |
| 15 Receiver Gain           | 44.0                                                                                              |
| 16 Relaxation Delay        | 5.0000                                                                                            |
| 17 Pulse Width             | 6.5500                                                                                            |
| 18 Presaturation Frequency |                                                                                                   |
| 19 Acquisition Time        | 0.1520                                                                                            |
| 20 Acquisition Date        | 2020-08-24T16:2 5:54                                                                              |
| 21 Modification Date       | 2020-08-24T16:4 5:07                                                                              |
| 22 Class                   |                                                                                                   |
| 23 Spectrometer            | 470.62                                                                                            |

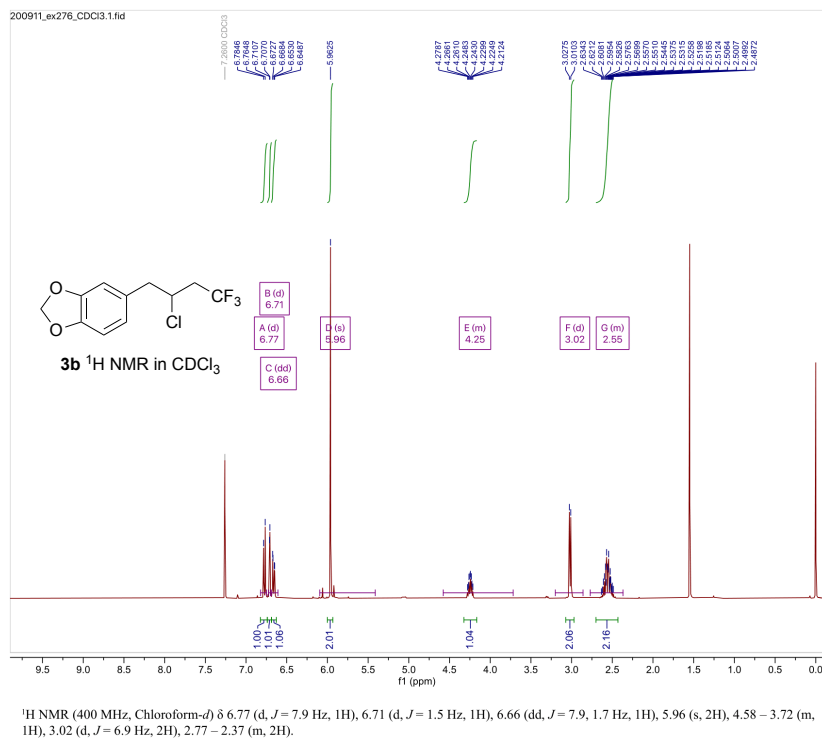

| Parameter                  | Value                                                                                    |
|----------------------------|------------------------------------------------------------------------------------------|
| 1 Data File Name           | C:/Users/furuyama/Documents/Personaldata/IshikawaYuta/NMR/生data/200911_ex276_CDCI3/1/fid |
| 2 Title                    | 200911_ex276_CDCI3.1.fid                                                                 |
| 3 Comment                  |                                                                                          |
| 4 Origin                   | Bruker BioSpin GmbH                                                                      |
| 5 Owner                    | nmsru                                                                                    |
| 6 Site                     |                                                                                          |
| 7 Instrument               | Avance                                                                                   |
| 8 Author                   |                                                                                          |
| 9 Solvent                  | CDCl3                                                                                    |
| 10 Temperature             | 298.1                                                                                    |
| 11 Pulse Sequence          | zg30                                                                                     |
| 12 Experiment              | 1D                                                                                       |
| 13 Probe                   | Z116098_0842 (PA BBO 400S1 BBF-H-D-05 Z SP)                                              |
| 14 Number of Scans         | 16                                                                                       |
| 15 Receiver Gain           | 101.0                                                                                    |
| 16 Relaxation Delay        | 1.0000                                                                                   |
| 17 Pulse Width             | 10.0000                                                                                  |
| 18 Presaturation Frequency |                                                                                          |
| 19 Acquisition Time        | 3.9977                                                                                   |
| 20 Acquisition Date        | 2020-09-11T09:36:20                                                                      |
| 21 Modification Date       | 2020-09-11T09:36:28                                                                      |

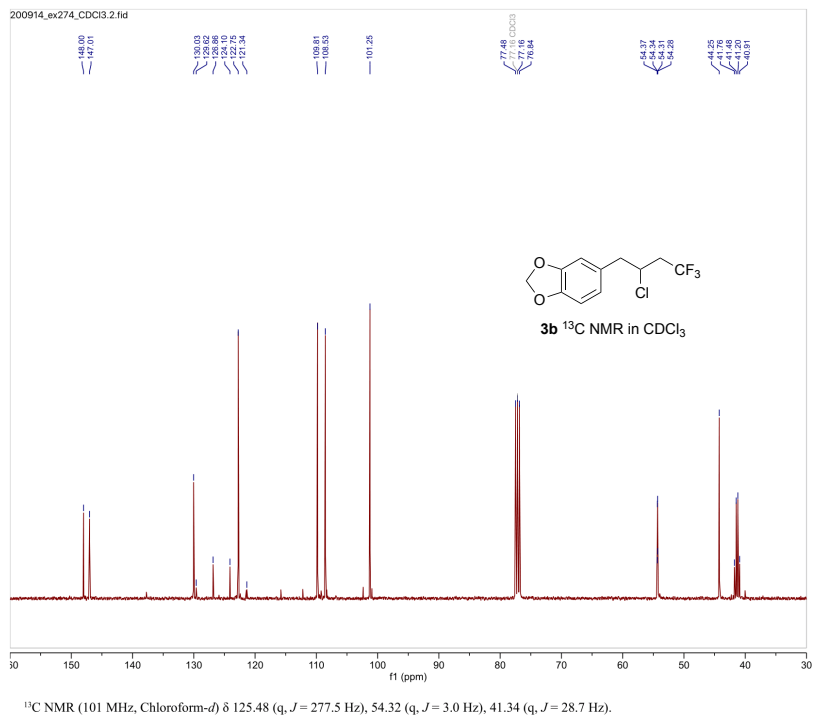

| Parameter                  | Value                                                                                    |
|----------------------------|------------------------------------------------------------------------------------------|
| 1 Data File Name           | C:/Users/furuyama/Documents/Personaldata/IshikawaYuta/NMR/生data/200914_ex274_CDCI3/2/fid |
| 2 Title                    | 200914_ex274_CDCI3.2.fid                                                                 |
| 3 Comment                  |                                                                                          |
| 4 Origin                   | Bruker BioSpin GmbH                                                                      |
| 5 Owner                    | nmsru                                                                                    |
| 6 Site                     |                                                                                          |
| 7 Instrument               | Avance                                                                                   |
| 8 Author                   |                                                                                          |
| 9 Solvent                  | CDCl3                                                                                    |
| 10 Temperature             | 297.9                                                                                    |
| 11 Pulse Sequence          | zgpg30                                                                                   |
| 12 Experiment              | 1D                                                                                       |
| 13 Probe                   | Z116098_0842 (PA BBO 400S1 BBF-H-D-05 Z SP)                                              |
| 14 Number of Scans         | 748                                                                                      |
| 15 Receiver Gain           | 39.1                                                                                     |
| 16 Relaxation Delay        | 2.0000                                                                                   |
| 17 Pulse Width             | 10.0000                                                                                  |
| 18 Presaturation Frequency |                                                                                          |
| 19 Acquisition Time        | 1.3763                                                                                   |
| 20 Acquisition Date        | 2020-09-14T09:50:32                                                                      |



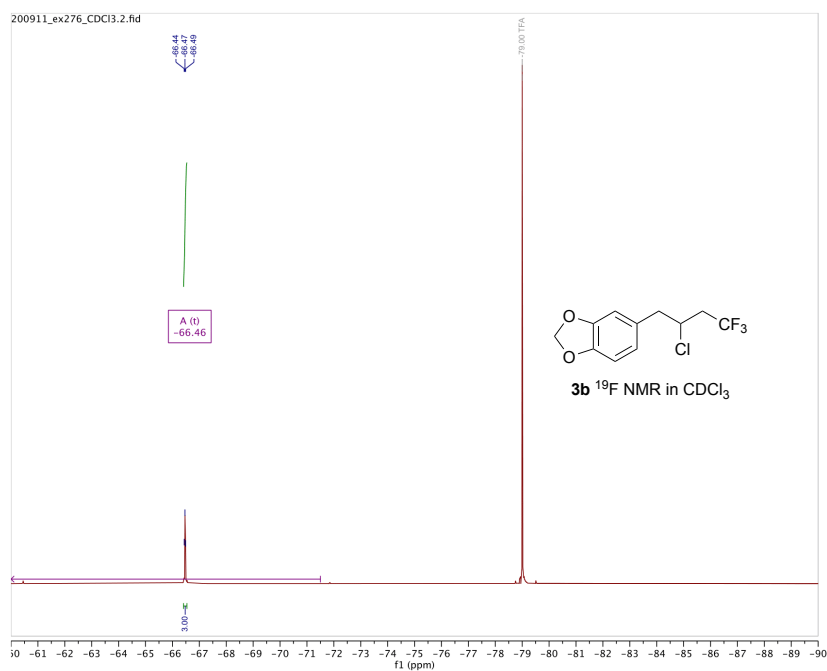

<sup>19</sup>F NMR (376 MHz, Chloroform-d) δ -66.46 (t, J = 10.1 Hz).

| Parameter                  | Value                                                                                      |
|----------------------------|--------------------------------------------------------------------------------------------|
| 1 Data File Name           | C:/Users/furuyama/Documents/Personaldata/IshikawaYuta/NMR/生data/200911_ex276_CDCl3/ 2/ fid |
| 2 Title                    | 200911_ex276_CDCl3.2.fid                                                                   |
| 3 Comment                  |                                                                                            |
| 4 Origin                   | Bruker BioSpin GmbH                                                                        |
| 5 Owner                    | nmsru                                                                                      |
| 6 Site                     |                                                                                            |
| 7 Instrument               | Avance                                                                                     |
| 8 Author                   |                                                                                            |
| 9 Solvent                  | CDCl3                                                                                      |
| 10 Temperature             | 298.1                                                                                      |
| 11 Pulse Sequence          | zg                                                                                         |
| 12 Experiment              | 1D                                                                                         |
| 13 Probe                   | Z116098_0842 (PA BBO 400S1 BBF-H-D-05 Z SP)                                                |
| 14 Number of Scans         | 16                                                                                         |
| 15 Receiver Gain           | 101.0                                                                                      |
| 16 Relaxation Delay        | 1.0000                                                                                     |
| 17 Pulse Width             | 18.0000                                                                                    |
| 18 Presaturation Frequency |                                                                                            |
| 19 Acquisition Time        | 0.7209                                                                                     |
| 20 Acquisition Date        | 2020-09-11T09:40:45                                                                        |
| 21 Modification Date       | 2020-09-11T09:3                                                                            |

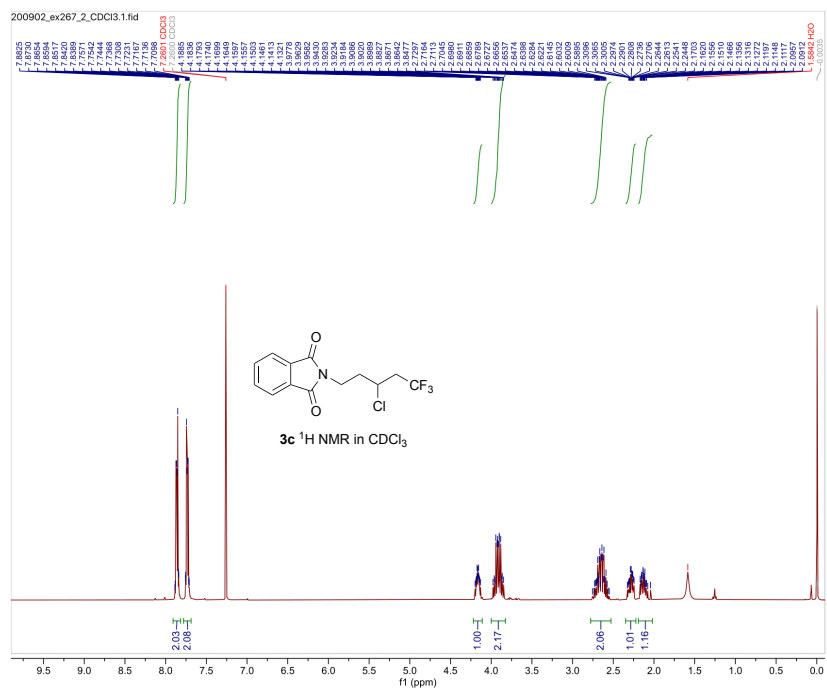

| Parameter                  | Value                                                                                        |
|----------------------------|----------------------------------------------------------------------------------------------|
| 1 Data File Name           | C:/Users/furuyama/Documents/Personaldata/IshikawaYuta/NMR/生data/200902_ex267_2_CDCl3/ 1/ fid |
| 2 Title                    | 200902_ex267_2_CDCl3.1.fid                                                                   |
| 3 Comment                  |                                                                                              |
| 4 Origin                   | Bruker BioSpin GmbH                                                                          |
| 5 Owner                    | nmsru                                                                                        |
| 6 Site                     |                                                                                              |
| 7 Instrument               | Avance                                                                                       |
| 8 Author                   |                                                                                              |
| 9 Solvent                  | CDCl3                                                                                        |
| 10 Temperature             | 298.1                                                                                        |
| 11 Pulse Sequence          | zg30                                                                                         |
| 12 Experiment              | 1D                                                                                           |
| 13 Probe                   | Z116098_0842 (PA BBO 400S1 BBF-H-D-05 Z SP)                                                  |
| 14 Number of Scans         | 16                                                                                           |
| 15 Receiver Gain           | 101.0                                                                                        |
| 16 Relaxation Delay        | 1.0000                                                                                       |
| 17 Pulse Width             | 10.0000                                                                                      |
| 18 Presaturation Frequency |                                                                                              |
| 19 Acquisition Time        | 3.9977                                                                                       |
| 20 Acquisition Date        | 2020-09-02T14:06:19                                                                          |
| 21 Modification Date       | 2020-09-02T14:01:18                                                                          |

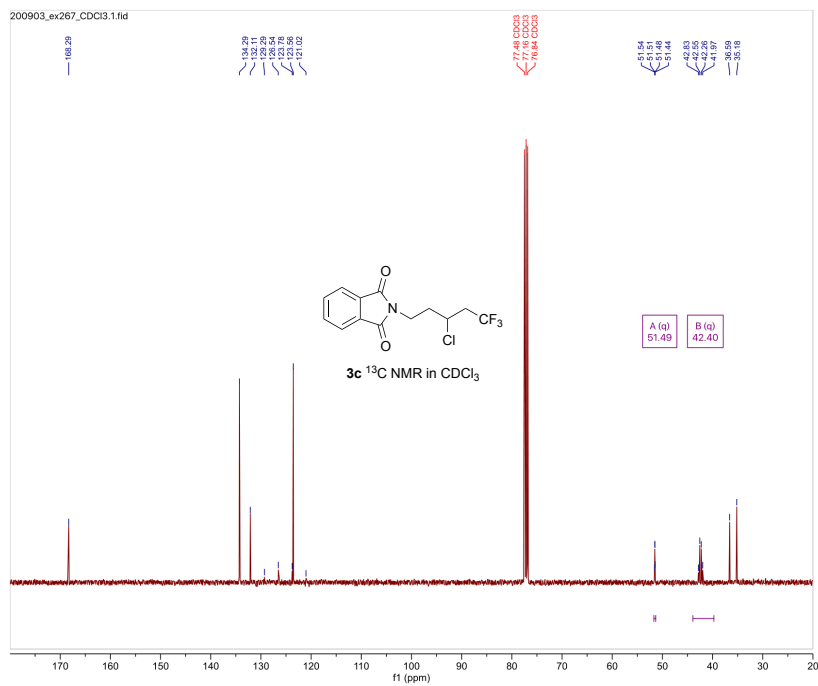

| Parameter                  | Value                                                                                               |
|----------------------------|-----------------------------------------------------------------------------------------------------|
| 1 Data File Name           | C:/ Users/ furuyama/ Documents/ Personaldata/ IshikawaYuta/ NMR/ 生data/ 200903_ex267_C DCI3/ 1/ fid |
| 2 Title                    | 200903_ex267_C DCI3.1.fid                                                                           |
| 3 Comment                  |                                                                                                     |
| 4 Origin                   | Bruker BioSpin GmbH                                                                                 |
| 5 Owner                    | nmsru                                                                                               |
| 6 Site                     |                                                                                                     |
| 7 Instrument               | Avance                                                                                              |
| 8 Author                   |                                                                                                     |
| 9 Solvent                  | CDCl3                                                                                               |
| 10 Temperature             | 298.2                                                                                               |
| 11 Pulse Sequence          | zgpg30                                                                                              |
| 12 Experiment              | 1D                                                                                                  |
| 13 Probe                   | Z116098_0842 (PA BBO 400S1 BBF-H-D-05 Z SP)                                                         |
| 14 Number of Scans         | 855                                                                                                 |
| 15 Receiver Gain           | 36.2                                                                                                |
| 16 Relaxation Delay        | 2.0000                                                                                              |
| 17 Pulse Width             | 10.0000                                                                                             |
| 18 Presaturation Frequency |                                                                                                     |
| 19 Acquisition Time        | 1.3763                                                                                              |
| 20 Acquisition Date        | 2020-09-03T14:5 2:53                                                                                |

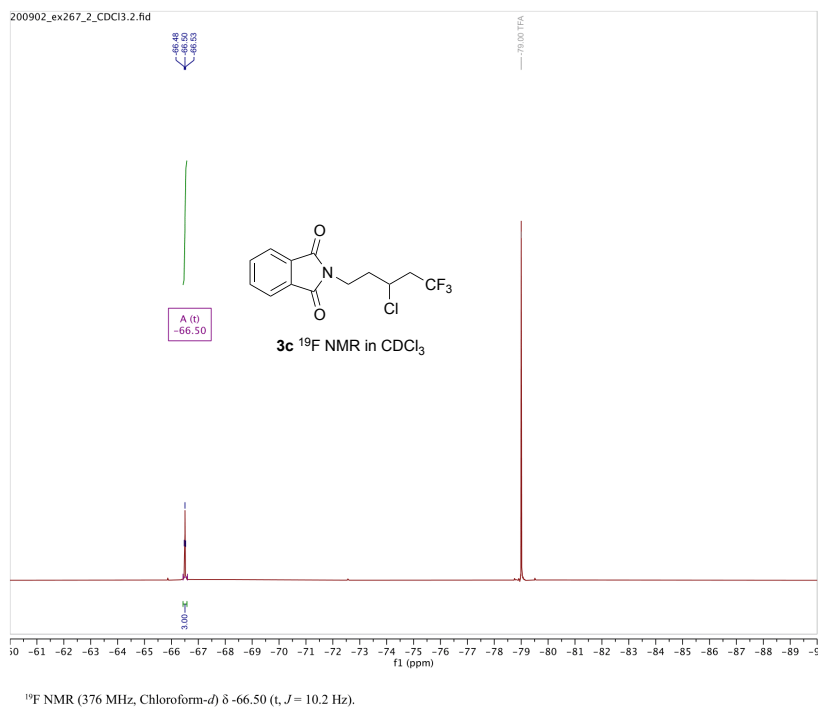

| Parameter                  | Value                                                                                                 |
|----------------------------|-------------------------------------------------------------------------------------------------------|
| 1 Data File Name           | C:/ Users/ furuyama/ Documents/ Personaldata/ IshikawaYuta/ NMR/ 生data/ 200902_ex267_2_ CDCl3/ 2/ fid |
| 2 Title                    | 200902_ex267_2_ CDCl3.2.fid                                                                           |
| 3 Comment                  |                                                                                                       |
| 4 Origin                   | Bruker BioSpin GmbH                                                                                   |
| 5 Owner                    | nmsru                                                                                                 |
| 6 Site                     |                                                                                                       |
| 7 Instrument               | Avance                                                                                                |
| 8 Author                   |                                                                                                       |
| 9 Solvent                  | CDCl3                                                                                                 |
| 10 Temperature             | 298.1                                                                                                 |
| 11 Pulse Sequence          | zg                                                                                                    |
| 12 Experiment              | 1D                                                                                                    |
| 13 Probe                   | Z116098_0842 (PA BBO 400S1 BBF-H-D-05 Z SP)                                                           |
| 14 Number of Scans         | 16                                                                                                    |
| 15 Receiver Gain           | 101.0                                                                                                 |
| 16 Relaxation Delay        | 1.0000                                                                                                |
| 17 Pulse Width             | 18.0000                                                                                               |
| 18 Presaturation Frequency |                                                                                                       |
| 19 Acquisition Time        | 0.7209                                                                                                |
| 20 Acquisition Date        | 2020-09-02T14:1 4:44                                                                                  |
| 21 Modification Date       | 2020-09-02T14:0                                                                                       |

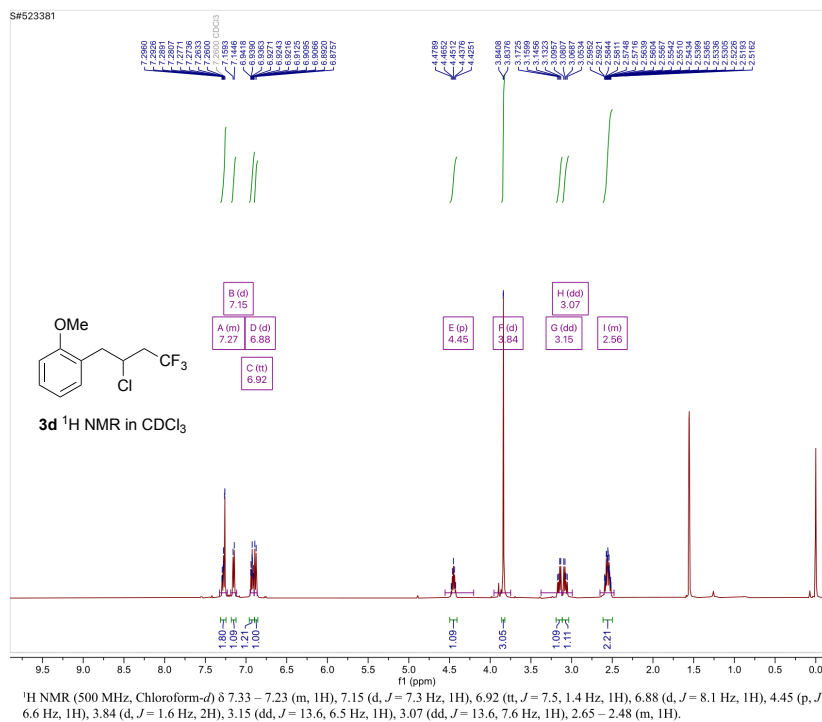

| Parameter                  | Value                                                                                    |
|----------------------------|------------------------------------------------------------------------------------------|
| 1 Data File Name           | C:/Users/furuyama/Documents/Personaldata/IshikawaYuta/NMR/生data/200918_ex280_CDCI3-1.jdf |
| 2 Title                    | S#523381                                                                                 |
| 3 Comment                  |                                                                                          |
| 4 Origin                   | JEOL                                                                                     |
| 5 Owner                    |                                                                                          |
| 6 Site                     |                                                                                          |
| 7 Instrument               | ECA 500                                                                                  |
| 8 Author                   | delta                                                                                    |
| 9 Solvent                  | CHLOROFORM-D                                                                             |
| 10 Temperature             | 20.9                                                                                     |
| 11 Pulse Sequence          | single_pulse.ex2                                                                         |
| 12 Experiment              | 1D                                                                                       |
| 13 Probe                   | 2756                                                                                     |
| 14 Number of Scans         | 8                                                                                        |
| 15 Receiver Gain           | 58.0                                                                                     |
| 16 Relaxation Delay        | 5.0000                                                                                   |
| 17 Pulse Width             | 5.7000                                                                                   |
| 18 Presaturation Frequency |                                                                                          |
| 19 Acquisition Time        | 1.7459                                                                                   |
| 20 Acquisition Date        | 2020-09-18T14:14:41                                                                      |
| 21 Modification Date       | 2020-09-18T14:33:51                                                                      |
| 22 Class                   |                                                                                          |
| 23 Spectrometer            | 500.16                                                                                   |

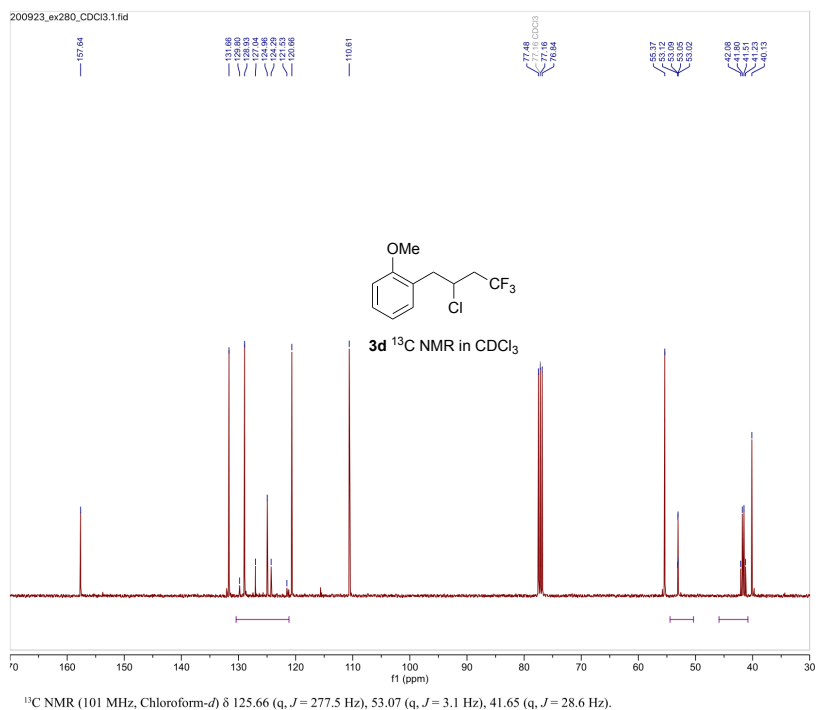

| Parameter                  | Value                                                                                     |
|----------------------------|-------------------------------------------------------------------------------------------|
| 1 Data File Name           | C:/Users/furuyama/Documents/Personaldata/IshikawaYuta/NMR/生data/200923_ex280_CDCI3/1/ fid |
| 2 Title                    | 200923_ex280_CDCI3.1.fid                                                                  |
| 3 Comment                  |                                                                                           |
| 4 Origin                   | Bruker BioSpin GmbH                                                                       |
| 5 Owner                    | nmsru                                                                                     |
| 6 Site                     |                                                                                           |
| 7 Instrument               | Avance                                                                                    |
| 8 Author                   |                                                                                           |
| 9 Solvent                  | CDCl3                                                                                     |
| 10 Temperature             | 298.2                                                                                     |
| 11 Pulse Sequence          | zgpg30                                                                                    |
| 12 Experiment              | 1D                                                                                        |
| 13 Probe                   | Z116098_0842 (PA BBO 400S1 BBF-H-D-05 Z SP)                                               |
| 14 Number of Scans         | 720                                                                                       |
| 15 Receiver Gain           | 33.7                                                                                      |
| 16 Relaxation Delay        | 2.0000                                                                                    |
| 17 Pulse Width             | 10.0000                                                                                   |
| 18 Presaturation Frequency |                                                                                           |
| 19 Acquisition Time        | 1.3763                                                                                    |
| 20 Acquisition Date        | 2020-09-23T10:58:12                                                                       |

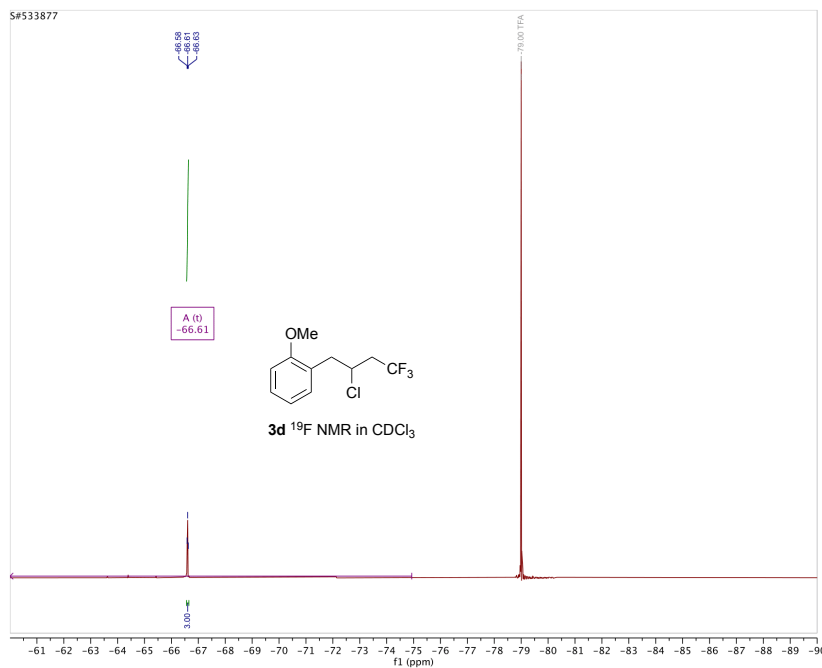

| Parameter                  | Value                                                                                         |
|----------------------------|-----------------------------------------------------------------------------------------------|
| 1 Data File Name           | C:/Users/furuyama/Documents/Personaldata/IshikawaYuta/NMR/生data/200918_ex280_CD Cl3_19F-1.jdf |
| 2 Title                    | S#533877                                                                                      |
| 3 Comment                  |                                                                                               |
| 4 Origin                   | JEOL                                                                                          |
| 5 Owner                    |                                                                                               |
| 6 Site                     |                                                                                               |
| 7 Instrument               | ECA 500                                                                                       |
| 8 Author                   | delta                                                                                         |
| 9 Solvent                  | CHLOROFORM-D                                                                                  |
| 10 Temperature             | 20.7                                                                                          |
| 11 Pulse Sequence          | single_pulse.ex2                                                                              |
| 12 Experiment              | 1D                                                                                            |
| 13 Probe                   | 2756                                                                                          |
| 14 Number of Scans         | 8                                                                                             |
| 15 Receiver Gain           | 44.0                                                                                          |
| 16 Relaxation Delay        | 5.0000                                                                                        |
| 17 Pulse Width             | 6.5500                                                                                        |
| 18 Presaturation Frequency |                                                                                               |
| 19 Acquisition Time        | 0.1520                                                                                        |
| 20 Acquisition Date        | 2020-09-18T14:32:21                                                                           |
| 21 Modification Date       | 2020-09-18T14:51:32                                                                           |
| 22 Class                   |                                                                                               |
| 23 Spectrometer            | 470.62                                                                                        |

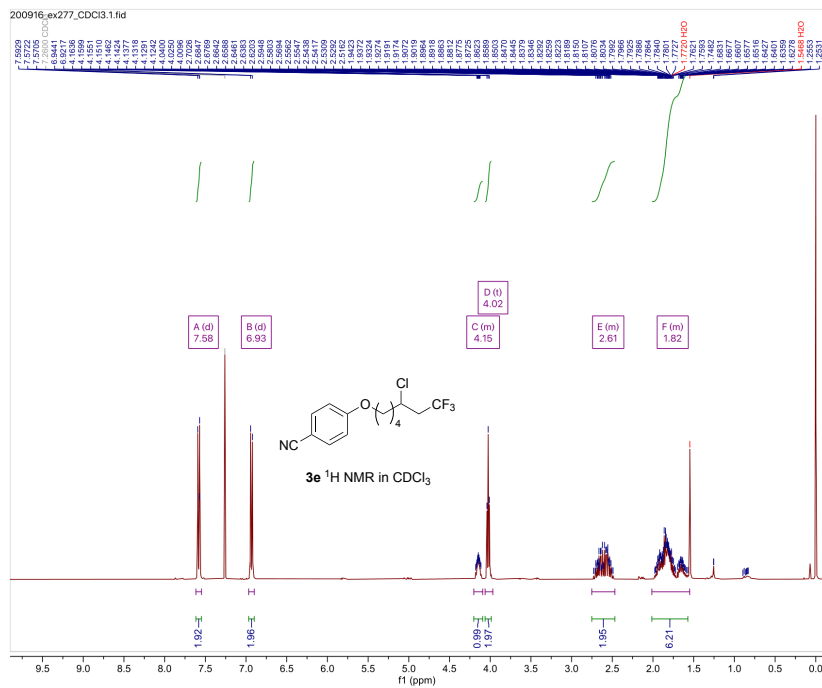

| Parameter                  | Value                                                                                     |
|----------------------------|-------------------------------------------------------------------------------------------|
| 1 Data File Name           | C:/Users/furuyama/Documents/Personaldata/IshikawaYuta/NMR/生data/200916_ex277_CDCI3/1/ fid |
| 2 Title                    | 200916_ex277_CDCI3.1.fid                                                                  |
| 3 Comment                  |                                                                                           |
| 4 Origin                   | Bruker BioSpin GmbH                                                                       |
| 5 Owner                    | nmrsu                                                                                     |
| 6 Site                     |                                                                                           |
| 7 Instrument               | Avance                                                                                    |
| 8 Author                   |                                                                                           |
| 9 Solvent                  | CDCl3                                                                                     |
| 10 Temperature             | 298.1                                                                                     |
| 11 Pulse Sequence          | zg30                                                                                      |
| 12 Experiment              | 1D                                                                                        |
| 13 Probe                   | Z116098_0842 (PA BBO 400S1 BBF-H-D-05 Z SP)                                               |
| 14 Number of Scans         | 16                                                                                        |
| 15 Receiver Gain           | 101.0                                                                                     |
| 16 Relaxation Delay        | 1.0000                                                                                    |
| 17 Pulse Width             | 10.0000                                                                                   |
| 18 Presaturation Frequency |                                                                                           |
| 19 Acquisition Time        | 3.9977                                                                                    |
| 20 Acquisition Date        | 2020-09-16T09:27:14                                                                       |
| 21 Modification Date       | 2020-09-16T09:26:48                                                                       |

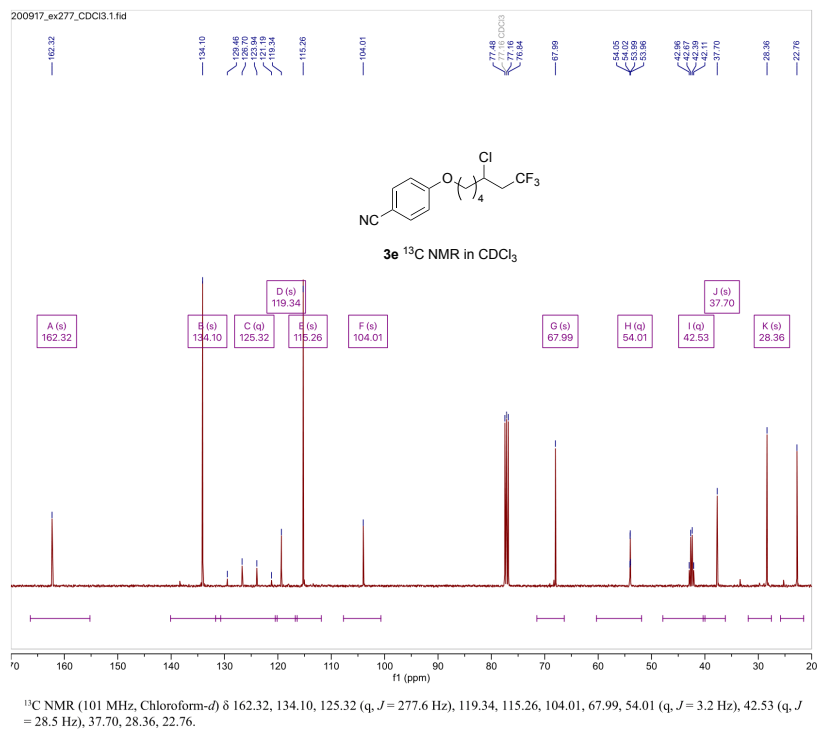

| Parameter                  | Value                                                                                      |
|----------------------------|--------------------------------------------------------------------------------------------|
| 1 Data File Name           | C:/Users/furuyama/Documents/Personaldata/IshikawaYuta/NMR/生data/200917_ex277_CDCl3/ 1/ fid |
| 2 Title                    | 200917_ex277_CDCl3.1.fid                                                                   |
| 3 Comment                  |                                                                                            |
| 4 Origin                   | Bruker BioSpin GmbH                                                                        |
| 5 Owner                    | nmsru                                                                                      |
| 6 Site                     |                                                                                            |
| 7 Instrument               | Avance                                                                                     |
| 8 Author                   |                                                                                            |
| 9 Solvent                  | CDCl3                                                                                      |
| 10 Temperature             | 298.2                                                                                      |
| 11 Pulse Sequence          | zgpg30                                                                                     |
| 12 Experiment              | 1D                                                                                         |
| 13 Probe                   | Z116098_0842 (PA BBO 400S1 BBF-H-D-05 Z SP)                                                |
| 14 Number of Scans         | 729                                                                                        |
| 15 Receiver Gain           | 34.9                                                                                       |
| 16 Relaxation Delay        | 2.0000                                                                                     |
| 17 Pulse Width             | 10.0000                                                                                    |
| 18 Presaturation Frequency |                                                                                            |
| 19 Acquisition Time        | 1.3763                                                                                     |
| 20 Acquisition Date        | 2020-09-17T13:35:44                                                                        |

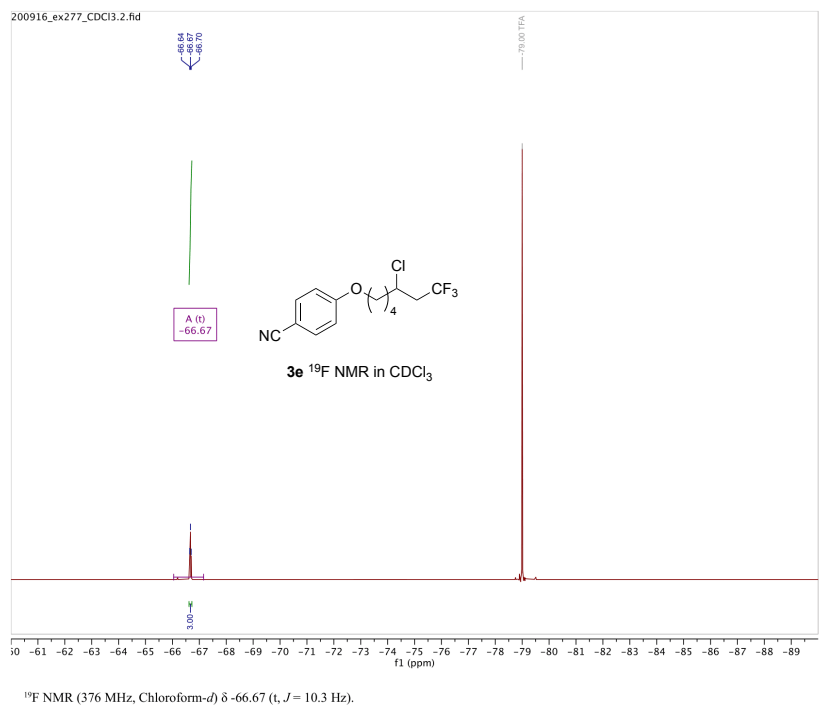

| Parameter                  | Value                                                                                      |
|----------------------------|--------------------------------------------------------------------------------------------|
| 1 Data File Name           | C:/Users/furuyama/Documents/Personaldata/IshikawaYuta/NMR/生data/200916_ex277_CDCl3/ 2/ fid |
| 2 Title                    | 200916_ex277_CDCl3.2.fid                                                                   |
| 3 Comment                  |                                                                                            |
| 4 Origin                   | Bruker BioSpin GmbH                                                                        |
| 5 Owner                    | nmsru                                                                                      |
| 6 Site                     |                                                                                            |
| 7 Instrument               | Avance                                                                                     |
| 8 Author                   |                                                                                            |
| 9 Solvent                  | CDCl3                                                                                      |
| 10 Temperature             | 298.1                                                                                      |
| 11 Pulse Sequence          | zg                                                                                         |
| 12 Experiment              | 1D                                                                                         |
| 13 Probe                   | Z116098_0842 (PA BBO 400S1 BBF-H-D-05 Z SP)                                                |
| 14 Number of Scans         | 16                                                                                         |
| 15 Receiver Gain           | 101.0                                                                                      |
| 16 Relaxation Delay        | 1.0000                                                                                     |
| 17 Pulse Width             | 18.0000                                                                                    |
| 18 Presaturation Frequency |                                                                                            |
| 19 Acquisition Time        | 0.7209                                                                                     |
| 20 Acquisition Date        | 2020-09-16T09:31:25                                                                        |
| 21 Modification Date       | 2020-09-16T09:31:25                                                                        |

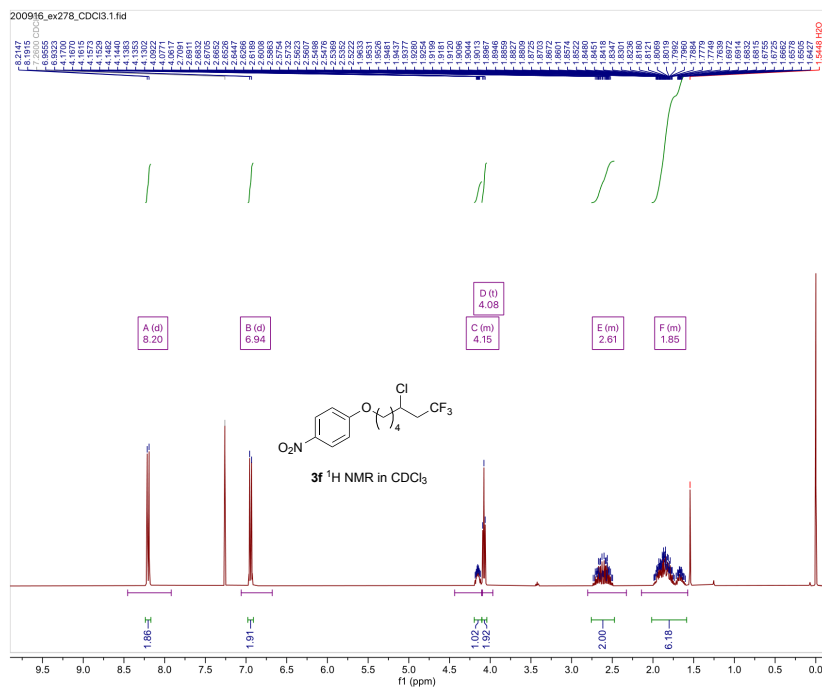

<sup>1</sup>H NMR (400 MHz, Chloroform-*d*) δ 8.20 (d, *J* = 9.3 Hz, 1H), 6.94 (d, *J* = 9.3 Hz, 1H), 4.44 – 4.10 (m, 1H), 4.08 (t, *J* = 6.1 Hz, 1H), 2.80 – 2.33 (m, 1H), 2.14 – 1.57 (m, 6H).

| Parameter                  | Value                                                                                     |
|----------------------------|-------------------------------------------------------------------------------------------|
| 1 Data File Name           | C:/Users/furuyama/Documents/Personaldata/IshikawaYuta/NMR/生data/200916_ex278_CDCI3/1/ fid |
| 2 Title                    | 200916_ex278_CDCI3.1.fid                                                                  |
| 3 Comment                  |                                                                                           |
| 4 Origin                   | Bruker BioSpin GmbH                                                                       |
| 5 Owner                    | nmsru                                                                                     |
| 6 Site                     |                                                                                           |
| 7 Instrument               | Avance                                                                                    |
| 8 Author                   |                                                                                           |
| 9 Solvent                  | CDCl <sub>3</sub>                                                                         |
| 10 Temperature             | 298.1                                                                                     |
| 11 Pulse Sequence          | zg30                                                                                      |
| 12 Experiment              | 1D                                                                                        |
| 13 Probe                   | Z116098_0842 (PA BBO 400S1 BBF-H-D-05 Z SP)                                               |
| 14 Number of Scans         | 16                                                                                        |
| 15 Receiver Gain           | 101.0                                                                                     |
| 16 Relaxation Delay        | 1.0000                                                                                    |
| 17 Pulse Width             | 10.0000                                                                                   |
| 18 Presaturation Frequency |                                                                                           |
| 19 Acquisition Time        | 3.9977                                                                                    |
| 20 Acquisition Date        | 2020-09-16T09:49:28                                                                       |
| 21 Modification Date       | 2020-09-16T09:49:07                                                                       |

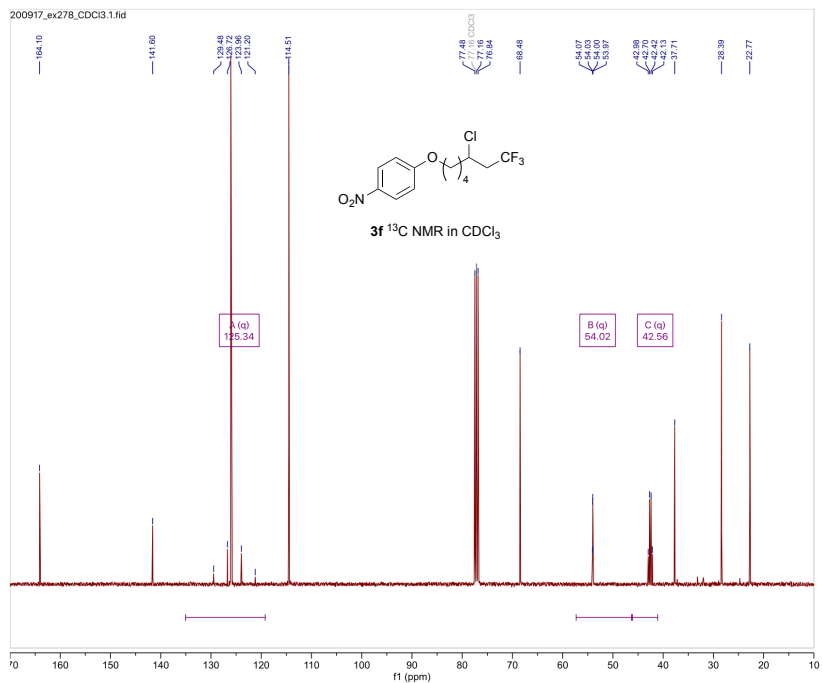

<sup>13</sup>C NMR (101 MHz, Chloroform-*d*) δ 125.34 (q, *J* = 277.6 Hz), 54.02 (q, *J* = 3.3 Hz), 42.56 (q, *J* = 28.5 Hz).

| Parameter                  | Value                                                                                     |
|----------------------------|-------------------------------------------------------------------------------------------|
| 1 Data File Name           | C:/Users/furuyama/Documents/Personaldata/IshikawaYuta/NMR/生data/200917_ex278_CDCI3/1/ fid |
| 2 Title                    | 200917_ex278_CDCI3.1.fid                                                                  |
| 3 Comment                  |                                                                                           |
| 4 Origin                   | Bruker BioSpin GmbH                                                                       |
| 5 Owner                    | nmsru                                                                                     |
| 6 Site                     |                                                                                           |
| 7 Instrument               | Avance                                                                                    |
| 8 Author                   |                                                                                           |
| 9 Solvent                  | CDCl <sub>3</sub>                                                                         |
| 10 Temperature             | 298.1                                                                                     |
| 11 Pulse Sequence          | zgpg30                                                                                    |
| 12 Experiment              | 1D                                                                                        |
| 13 Probe                   | Z116098_0842 (PA BBO 400S1 BBF-H-D-05 Z SP)                                               |
| 14 Number of Scans         | 837                                                                                       |
| 15 Receiver Gain           | 34.9                                                                                      |
| 16 Relaxation Delay        | 2.0000                                                                                    |
| 17 Pulse Width             | 10.0000                                                                                   |
| 18 Presaturation Frequency |                                                                                           |
| 19 Acquisition Time        | 1.3763                                                                                    |
| 20 Acquisition Date        | 2020-09-17T14:27:06                                                                       |

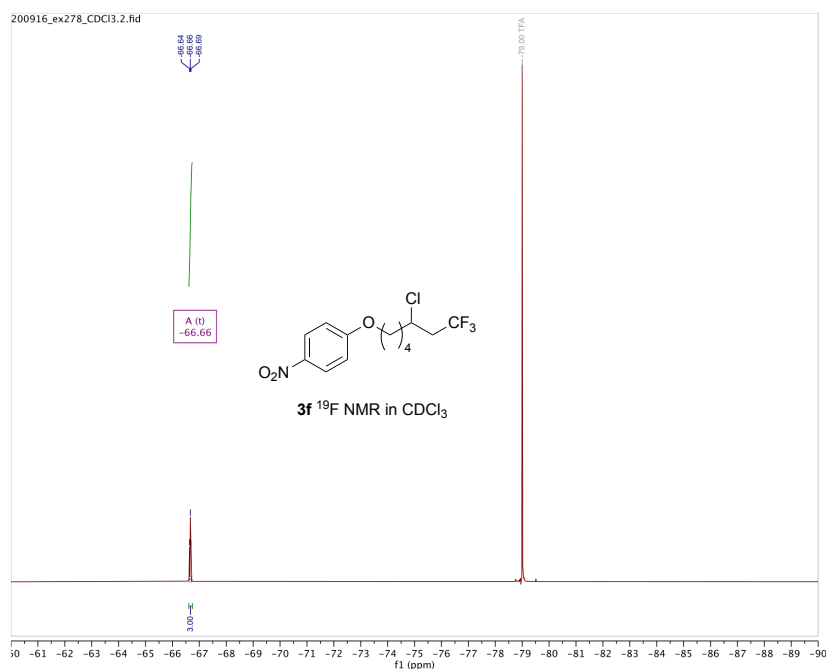

<sup>19</sup>F NMR (376 MHz, Chloroform-*d*) δ -66.66 (t, *J* = 10.1 Hz).

| Parameter                  | Value                                                                                      |
|----------------------------|--------------------------------------------------------------------------------------------|
| 1 Data File Name           | C:/Users/furuyama/Documents/Personaldata/IshikawaYuta/NMR/生data/200916_ex278_CDCl3/ 2/ fid |
| 2 Title                    | 200916_ex278_CDCl3.2.fid                                                                   |
| 3 Comment                  |                                                                                            |
| 4 Origin                   | Bruker BioSpin GmbH                                                                        |
| 5 Owner                    | nmsu                                                                                       |
| 6 Site                     |                                                                                            |
| 7 Instrument               | Avance                                                                                     |
| 8 Author                   |                                                                                            |
| 9 Solvent                  | CDCl3                                                                                      |
| 10 Temperature             | 298.1                                                                                      |
| 11 Pulse Sequence          | zg                                                                                         |
| 12 Experiment              | 1D                                                                                         |
| 13 Probe                   | Z116098_0842 (PA BBO 400S1 BBF-H-D-05 Z SP)                                                |
| 14 Number of Scans         | 16                                                                                         |
| 15 Receiver Gain           | 101.0                                                                                      |
| 16 Relaxation Delay        | 1.0000                                                                                     |
| 17 Pulse Width             | 18.0000                                                                                    |
| 18 Presaturation Frequency |                                                                                            |
| 19 Acquisition Time        | 0.7209                                                                                     |
| 20 Acquisition Date        | 2020-09-16T09:53:50                                                                        |
| 21 Modification Date       | 2020-09-16T09:53:50                                                                        |

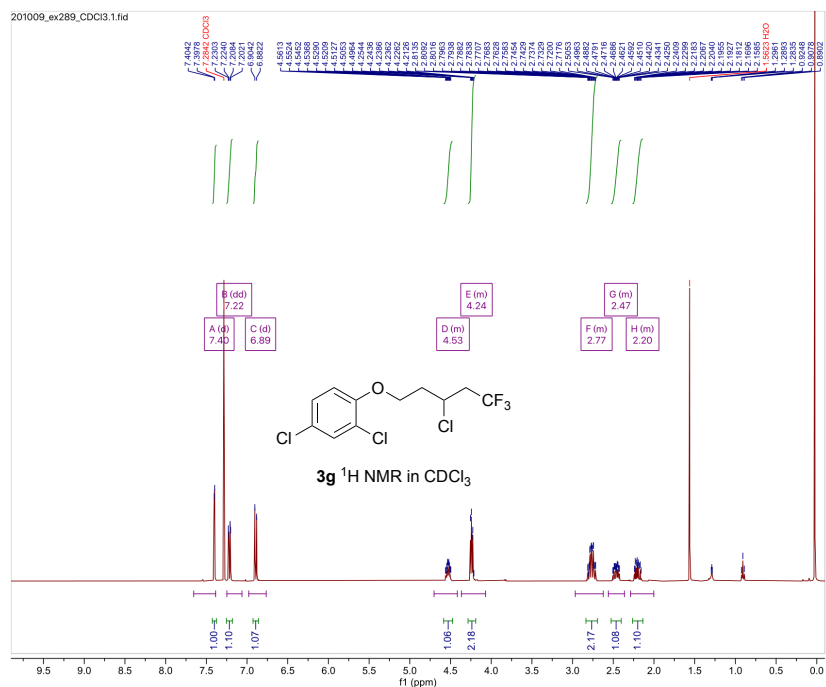

<sup>1</sup>H NMR (400 MHz, Chloroform-*d*) δ 7.40 (d, *J* = 2.5 Hz, 1H), 7.22 (dd, *J* = 8.8, 2.5 Hz, 1H), 6.89 (d, *J* = 8.8 Hz, 1H), 4.70 – 4.42 (m, 1H), 4.37 – 4.07 (m, 2H), 2.97 – 2.62 (m, 2H), 2.56 – 2.36 (m, 1H), 2.29 – 2.00 (m, 1H).

| Parameter                  | Value                                                                                      |
|----------------------------|--------------------------------------------------------------------------------------------|
| 1 Data File Name           | C:/Users/furuyama/Documents/Personaldata/IshikawaYuta/NMR/生data/201009_ex289_CDCl3/ 1/ fid |
| 2 Title                    | 201009_ex289_CDCl3.1.fid                                                                   |
| 3 Comment                  |                                                                                            |
| 4 Origin                   | Bruker BioSpin GmbH                                                                        |
| 5 Owner                    | nmsu                                                                                       |
| 6 Site                     |                                                                                            |
| 7 Instrument               | Avance                                                                                     |
| 8 Author                   |                                                                                            |
| 9 Solvent                  | CDCl3                                                                                      |
| 10 Temperature             | 298.1                                                                                      |
| 11 Pulse Sequence          | zg30                                                                                       |
| 12 Experiment              | 1D                                                                                         |
| 13 Probe                   | Z116098_0842 (PA BBO 400S1 BBF-H-D-05 Z SP)                                                |
| 14 Number of Scans         | 16                                                                                         |
| 15 Receiver Gain           | 101.0                                                                                      |
| 16 Relaxation Delay        | 1.0000                                                                                     |
| 17 Pulse Width             | 10.0000                                                                                    |
| 18 Presaturation Frequency |                                                                                            |
| 19 Acquisition Time        | 3.9977                                                                                     |
| 20 Acquisition Date        | 2020-10-09T14:32:12                                                                        |
| 21 Modification Date       | 2020-10-09T14:29:34                                                                        |

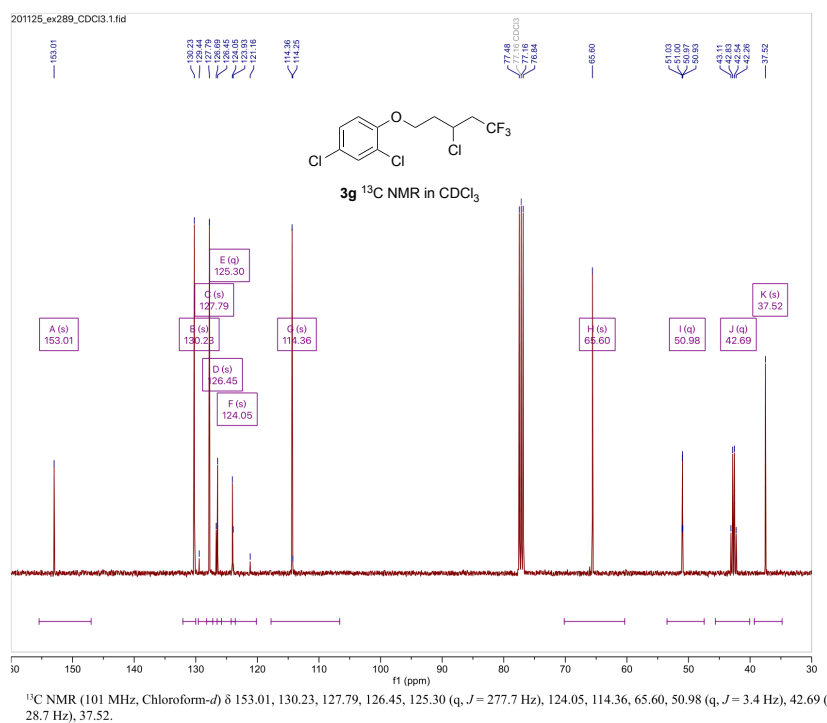

| Parameter                  | Value                                                                                    |
|----------------------------|------------------------------------------------------------------------------------------|
| 1 Data File Name           | C:/Users/furuyama/Documents/Personaldata/IshikawaYuta/NMR/生data/201125_ex289_CDCI3/1/fid |
| 2 Title                    | 201125_ex289_CDCI3.1.fid                                                                 |
| 3 Comment                  |                                                                                          |
| 4 Origin                   | Bruker BioSpin GmbH                                                                      |
| 5 Owner                    | nmsru                                                                                    |
| 6 Site                     |                                                                                          |
| 7 Instrument               | Avance                                                                                   |
| 8 Author                   |                                                                                          |
| 9 Solvent                  | CDCl3                                                                                    |
| 10 Temperature             | 298.3                                                                                    |
| 11 Pulse Sequence          | zgpg30                                                                                   |
| 12 Experiment              | 1D                                                                                       |
| 13 Probe                   | Z116098_0842 (PA BBO 400S1 BBF-H-D-05 Z SP)                                              |
| 14 Number of Scans         | 927                                                                                      |
| 15 Receiver Gain           | 26.4                                                                                     |
| 16 Relaxation Delay        | 2.0000                                                                                   |
| 17 Pulse Width             | 10.0000                                                                                  |
| 18 Presaturation Frequency |                                                                                          |
| 19 Acquisition Time        | 1.3763                                                                                   |
| 20 Acquisition Date        | 2020-11-25T14:51:55                                                                      |

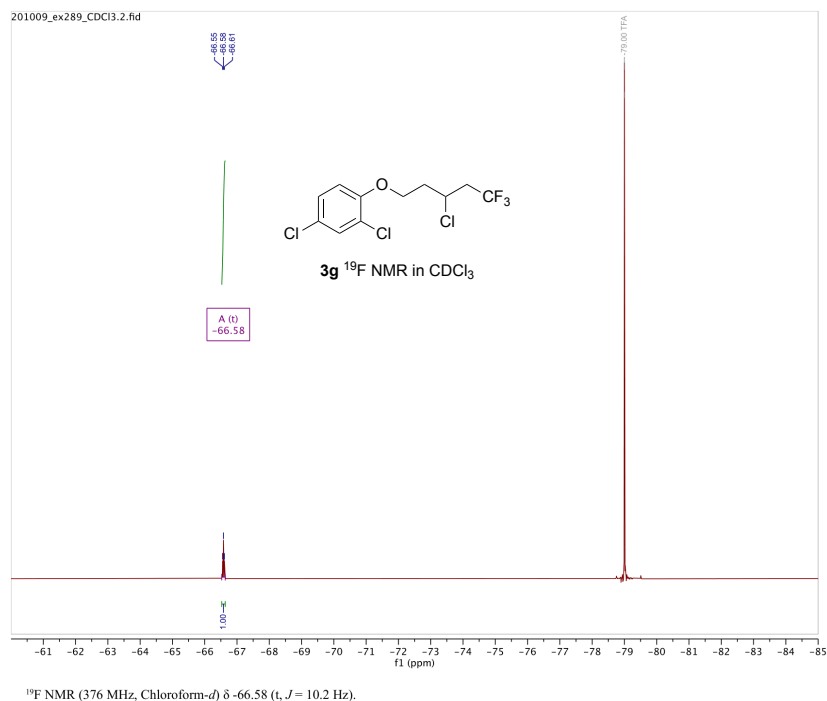

| Parameter                  | Value                                                                                    |
|----------------------------|------------------------------------------------------------------------------------------|
| 1 Data File Name           | C:/Users/furuyama/Documents/Personaldata/IshikawaYuta/NMR/生data/201009_ex289_CDCI3/2/fid |
| 2 Title                    | 201009_ex289_CDCI3.2.fid                                                                 |
| 3 Comment                  |                                                                                          |
| 4 Origin                   | Bruker BioSpin GmbH                                                                      |
| 5 Owner                    | nmsru                                                                                    |
| 6 Site                     |                                                                                          |
| 7 Instrument               | Avance                                                                                   |
| 8 Author                   |                                                                                          |
| 9 Solvent                  | CDCl3                                                                                    |
| 10 Temperature             | 298.1                                                                                    |
| 11 Pulse Sequence          | zg                                                                                       |
| 12 Experiment              | 1D                                                                                       |
| 13 Probe                   | Z116098_0842 (PA BBO 400S1 BBF-H-D-05 Z SP)                                              |
| 14 Number of Scans         | 16                                                                                       |
| 15 Receiver Gain           | 101.0                                                                                    |
| 16 Relaxation Delay        | 1.0000                                                                                   |
| 17 Pulse Width             | 18.0000                                                                                  |
| 18 Presaturation Frequency |                                                                                          |
| 19 Acquisition Time        | 0.7209                                                                                   |
| 20 Acquisition Date        | 2020-10-09T14:36:28                                                                      |
| 21 Modification Date       | 2020-10-09T14:3                                                                          |



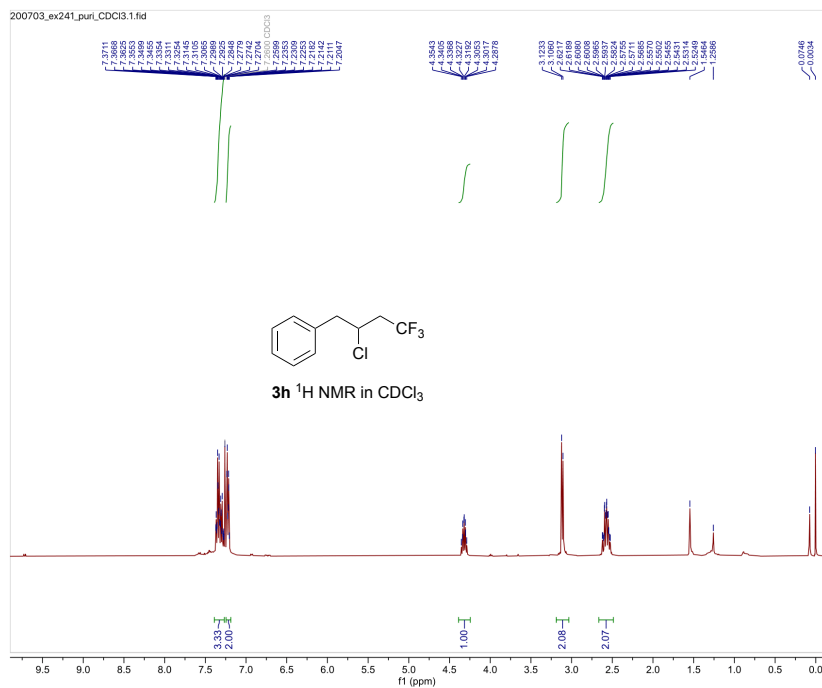

| Parameter                     | Value                                                                                                                         |
|-------------------------------|-------------------------------------------------------------------------------------------------------------------------------|
| 1 Data File Name              | C:/ Users/<br>furuyama/<br>Documents/<br>Personaldata/<br>IshikawaYuta/<br>NMR/ 生data/<br>200703_ex241_pu<br>ri_CDCl3/ 1/ fid |
| 2 Title                       | 200703_ex241_pu<br>ri_CDCl3.1.fid                                                                                             |
| 3 Comment                     |                                                                                                                               |
| 4 Origin                      | Bruker BioSpin<br>GmbH                                                                                                        |
| 5 Owner                       | nmsu                                                                                                                          |
| 6 Site                        |                                                                                                                               |
| 7 Instrument                  | Avance                                                                                                                        |
| 8 Author                      |                                                                                                                               |
| 9 Solvent                     | CDCl <sub>3</sub>                                                                                                             |
| 10 Temperature                | 298.1                                                                                                                         |
| 11 Pulse Sequence             | zg30                                                                                                                          |
| 12 Experiment                 | 1D                                                                                                                            |
| 13 Probe                      | Z116098_0842<br>(PA BBO 400S1<br>BBF-H-D-05 Z SP)                                                                             |
| 14 Number of Scans            | 16                                                                                                                            |
| 15 Receiver Gain              | 101.0                                                                                                                         |
| 16 Relaxation Delay           | 1.0000                                                                                                                        |
| 17 Pulse Width                | 10.0000                                                                                                                       |
| 18 Presaturation<br>Frequency |                                                                                                                               |
| 19 Acquisition Time           | 3.9977                                                                                                                        |
| 20 Acquisition Date           | 2020-07-03T14:5<br>2:58                                                                                                       |
| 21 Modification Date          | 2020-07-03T14:5<br>0:06                                                                                                       |

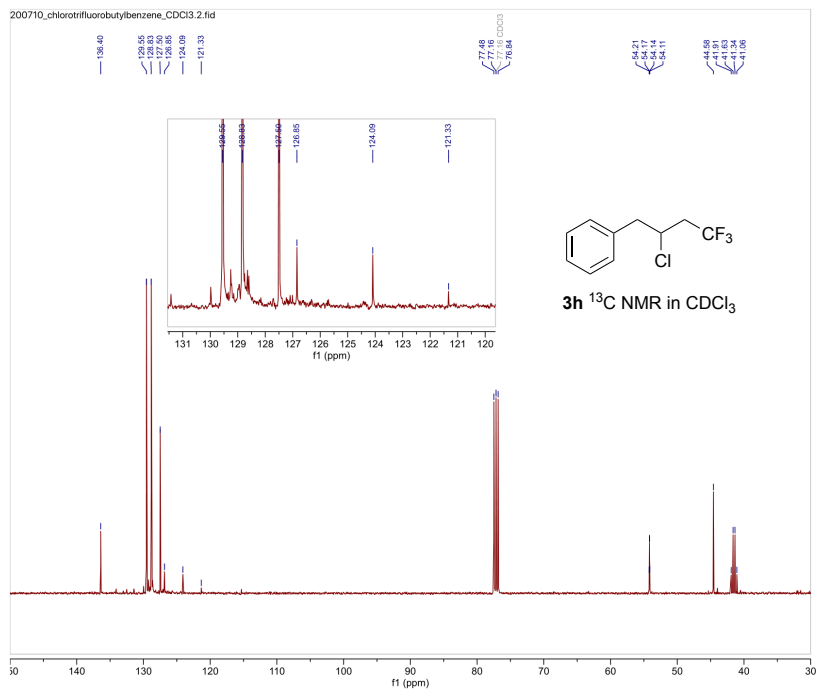

| Parameter                     | Value                                                                                                                                              |
|-------------------------------|----------------------------------------------------------------------------------------------------------------------------------------------------|
| 1 Data File Name              | C:/ Users/<br>furuyama/<br>Documents/<br>Personaldata/<br>IshikawaYuta/<br>NMR/ 生data/<br>200710_chlorotrifl<br>uorobutylbenzene<br>_CDCl3/ 2/ fid |
| 2 Title                       | 200710_chlorotrifl<br>uorobutylbenzene<br>_CDCl3.2.fid                                                                                             |
| 3 Comment                     |                                                                                                                                                    |
| 4 Origin                      | Bruker BioSpin<br>GmbH                                                                                                                             |
| 5 Owner                       | nmsu                                                                                                                                               |
| 6 Site                        |                                                                                                                                                    |
| 7 Instrument                  | Avance                                                                                                                                             |
| 8 Author                      |                                                                                                                                                    |
| 9 Solvent                     | CDCl <sub>3</sub>                                                                                                                                  |
| 10 Temperature                | 298.1                                                                                                                                              |
| 11 Pulse Sequence             | zgpg30                                                                                                                                             |
| 12 Experiment                 | 1D                                                                                                                                                 |
| 13 Probe                      | Z116098_0842<br>(PA BBO 400S1<br>BBF-H-D-05 Z SP)                                                                                                  |
| 14 Number of Scans            | 1024                                                                                                                                               |
| 15 Receiver Gain              | 32.6                                                                                                                                               |
| 16 Relaxation Delay           | 2.0000                                                                                                                                             |
| 17 Pulse Width                | 10.0000                                                                                                                                            |
| 18 Presaturation<br>Frequency |                                                                                                                                                    |
| 19 Acquisition Time           | 1.3763                                                                                                                                             |

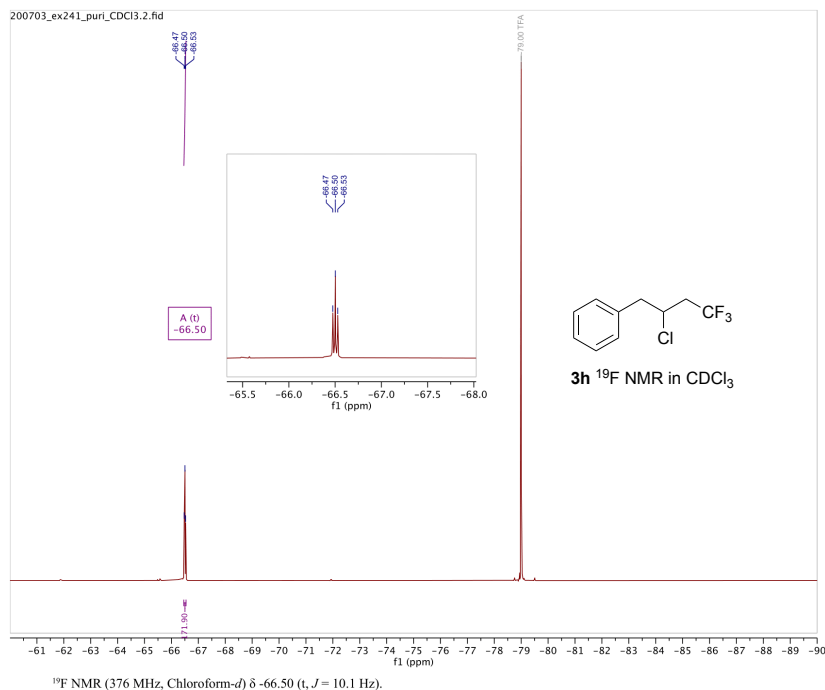

| Parameter                  | Value                                                                                         |
|----------------------------|-----------------------------------------------------------------------------------------------|
| 1 Data File Name           | C:/Users/furuyama/Documents/Personaldata/IshikawaYuta/NMR/生data/200703_ex241_puri_CDCl3/2/fid |
| 2 Title                    | 200703_ex241_puri_CDCl3.2.fid                                                                 |
| 3 Comment                  |                                                                                               |
| 4 Origin                   | Bruker BioSpin GmbH                                                                           |
| 5 Owner                    | nMrsu                                                                                         |
| 6 Site                     |                                                                                               |
| 7 Instrument               | Avance                                                                                        |
| 8 Author                   |                                                                                               |
| 9 Solvent                  | CDCl3                                                                                         |
| 10 Temperature             | 298.1                                                                                         |
| 11 Pulse Sequence          | zg                                                                                            |
| 12 Experiment              | 1D                                                                                            |
| 13 Probe                   | Z116098_0842 (PA BBO 400S1 BBF-H-D-05 Z SP)                                                   |
| 14 Number of Scans         | 16                                                                                            |
| 15 Receiver Gain           | 101.0                                                                                         |
| 16 Relaxation Delay        | 1.0000                                                                                        |
| 17 Pulse Width             | 18.0000                                                                                       |
| 18 Presaturation Frequency |                                                                                               |
| 19 Acquisition Time        | 0.7209                                                                                        |
| 20 Acquisition Date        | 2020-07-03T14:57:13                                                                           |
| 21 Modification Date       | 2020-07-03T14:5                                                                               |

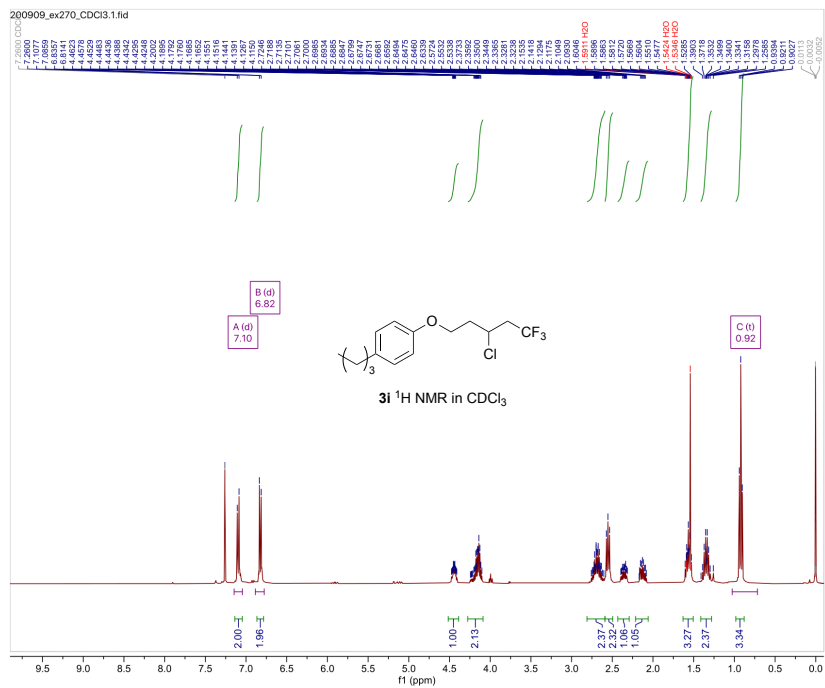

| Parameter                  | Value                                                                                    |
|----------------------------|------------------------------------------------------------------------------------------|
| 1 Data File Name           | C:/Users/furuyama/Documents/Personaldata/IshikawaYuta/NMR/生data/200909_ex270_CDCl3/1/fid |
| 2 Title                    | 200909_ex270_CDCl3.1.fid                                                                 |
| 3 Comment                  |                                                                                          |
| 4 Origin                   | Bruker BioSpin GmbH                                                                      |
| 5 Owner                    | nMrsu                                                                                    |
| 6 Site                     |                                                                                          |
| 7 Instrument               | Avance                                                                                   |
| 8 Author                   |                                                                                          |
| 9 Solvent                  | CDCl3                                                                                    |
| 10 Temperature             | 298.1                                                                                    |
| 11 Pulse Sequence          | zg30                                                                                     |
| 12 Experiment              | 1D                                                                                       |
| 13 Probe                   | Z116098_0842 (PA BBO 400S1 BBF-H-D-05 Z SP)                                              |
| 14 Number of Scans         | 16                                                                                       |
| 15 Receiver Gain           | 101.0                                                                                    |
| 16 Relaxation Delay        | 1.0000                                                                                   |
| 17 Pulse Width             | 10.0000                                                                                  |
| 18 Presaturation Frequency |                                                                                          |
| 19 Acquisition Time        | 3.9977                                                                                   |
| 20 Acquisition Date        | 2020-09-09T12:59:30                                                                      |
| 21 Modification Date       | 2020-09-09T12:59:48                                                                      |

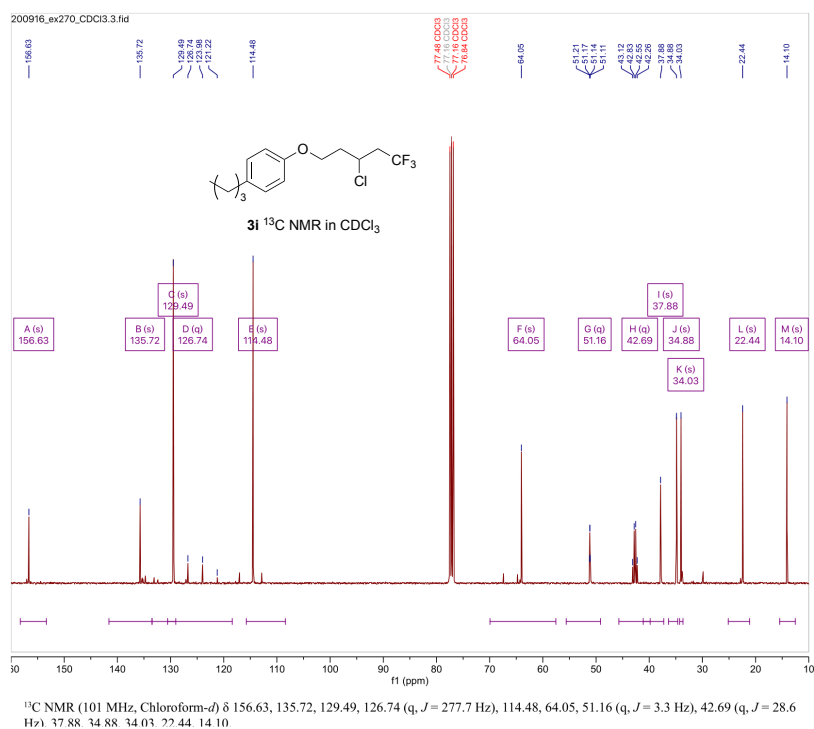

| Parameter                  | Value                                                                                      |
|----------------------------|--------------------------------------------------------------------------------------------|
| 1 Data File Name           | C:/Users/furuyama/Documents/Personaldata/IshikawaYuta/NMR/生data/200916_ex270_CDCl3/ 3/ fid |
| 2 Title                    | 200916_ex270_CDCl3.3.fid                                                                   |
| 3 Comment                  |                                                                                            |
| 4 Origin                   | Bruker BioSpin GmbH                                                                        |
| 5 Owner                    | nmsru                                                                                      |
| 6 Site                     |                                                                                            |
| 7 Instrument               | Avance                                                                                     |
| 8 Author                   |                                                                                            |
| 9 Solvent                  | CDCl3                                                                                      |
| 10 Temperature             | 298.1                                                                                      |
| 11 Pulse Sequence          | zgpg30                                                                                     |
| 12 Experiment              | 1D                                                                                         |
| 13 Probe                   | Z116098_0842 (PA BBO 400S1 BBF-H-D-05 Z SP)                                                |
| 14 Number of Scans         | 10000                                                                                      |
| 15 Receiver Gain           | 34.9                                                                                       |
| 16 Relaxation Delay        | 2.0000                                                                                     |
| 17 Pulse Width             | 10.0000                                                                                    |
| 18 Presaturation Frequency |                                                                                            |
| 19 Acquisition Time        | 1.3763                                                                                     |
| 20 Acquisition Date        | 2020-09-17T05:39:18                                                                        |

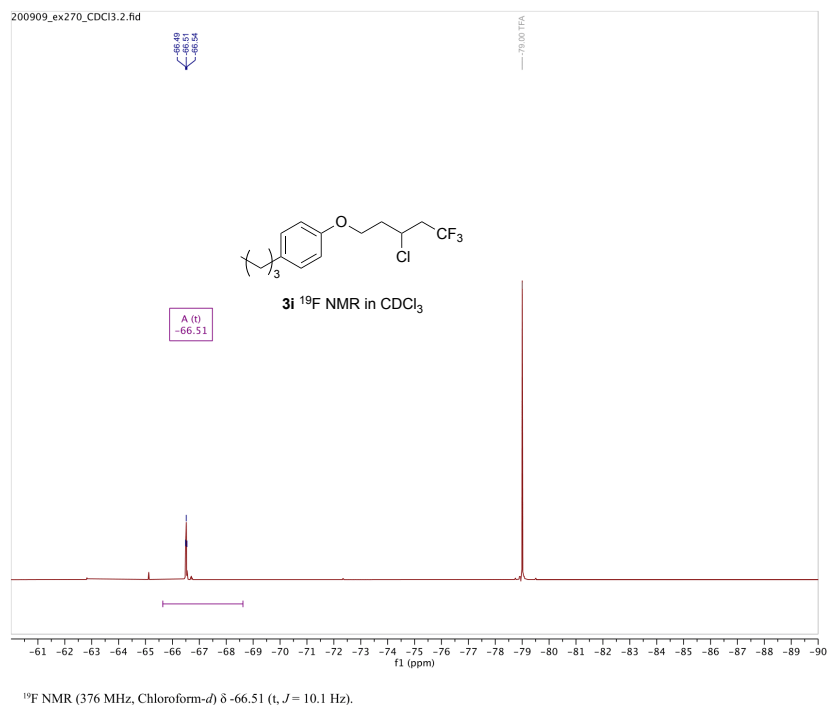

| Parameter                  | Value                                                                                      |
|----------------------------|--------------------------------------------------------------------------------------------|
| 1 Data File Name           | C:/Users/furuyama/Documents/Personaldata/IshikawaYuta/NMR/生data/200909_ex270_CDCl3/ 2/ fid |
| 2 Title                    | 200909_ex270_CDCl3.2.fid                                                                   |
| 3 Comment                  |                                                                                            |
| 4 Origin                   | Bruker BioSpin GmbH                                                                        |
| 5 Owner                    | nmsru                                                                                      |
| 6 Site                     |                                                                                            |
| 7 Instrument               | Avance                                                                                     |
| 8 Author                   |                                                                                            |
| 9 Solvent                  | CDCl3                                                                                      |
| 10 Temperature             | 298.1                                                                                      |
| 11 Pulse Sequence          | zg                                                                                         |
| 12 Experiment              | 1D                                                                                         |
| 13 Probe                   | Z116098_0842 (PA BBO 400S1 BBF-H-D-05 Z SP)                                                |
| 14 Number of Scans         | 16                                                                                         |
| 15 Receiver Gain           | 101.0                                                                                      |
| 16 Relaxation Delay        | 1.0000                                                                                     |
| 17 Pulse Width             | 18.0000                                                                                    |
| 18 Presaturation Frequency |                                                                                            |
| 19 Acquisition Time        | 0.7209                                                                                     |
| 20 Acquisition Date        | 2020-09-09T13:05:52                                                                        |
| 21 Modification Date       | 2020-09-09T13:05:52                                                                        |

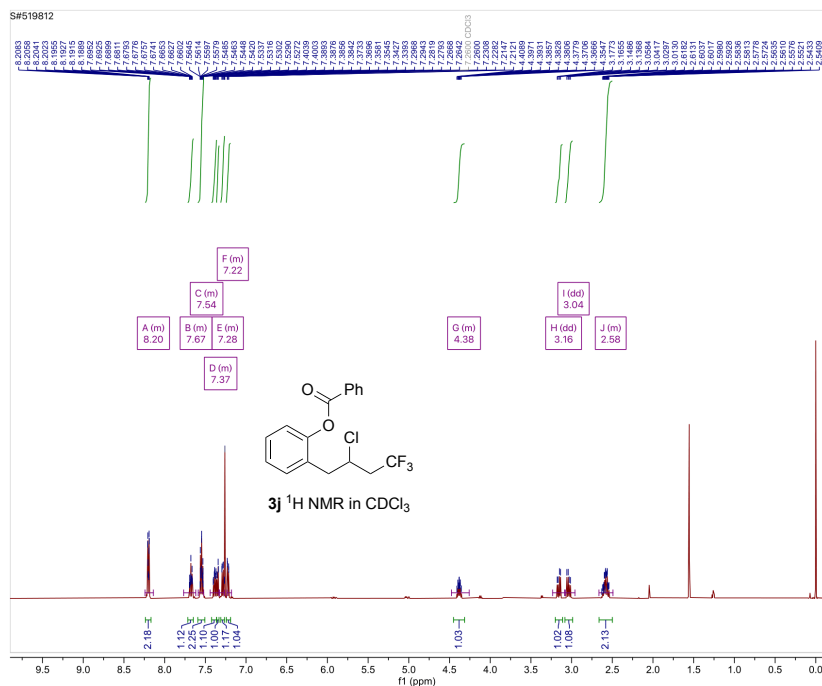

| Parameter                  | Value                                                                                    |
|----------------------------|------------------------------------------------------------------------------------------|
| 1 Data File Name           | C:/Users/furuyama/Documents/Personaldata/IshikawaYuta/NMR/生data/200918_ex279_CDCI3-1.jdf |
| 2 Title                    | S#519812                                                                                 |
| 3 Comment                  |                                                                                          |
| 4 Origin                   | JEOL                                                                                     |
| 5 Owner                    |                                                                                          |
| 6 Site                     |                                                                                          |
| 7 Instrument               | ECA 500                                                                                  |
| 8 Author                   | delta                                                                                    |
| 9 Solvent                  | CHLOROFORM-D                                                                             |
| 10 Temperature             | 20.8                                                                                     |
| 11 Pulse Sequence          | single_pulse.ex2                                                                         |
| 12 Experiment              | 1D                                                                                       |
| 13 Probe                   | 2756                                                                                     |
| 14 Number of Scans         | 8                                                                                        |
| 15 Receiver Gain           | 56.0                                                                                     |
| 16 Relaxation Delay        | 5.0000                                                                                   |
| 17 Pulse Width             | 5.7000                                                                                   |
| 18 Presaturation Frequency |                                                                                          |
| 19 Acquisition Time        | 1.7459                                                                                   |
| 20 Acquisition Date        | 2020-09-18T14:08:45                                                                      |
| 21 Modification Date       | 2020-09-18T14:27:56                                                                      |
| 22 Class                   |                                                                                          |
| 23 Spectrometer            | 500.16                                                                                   |

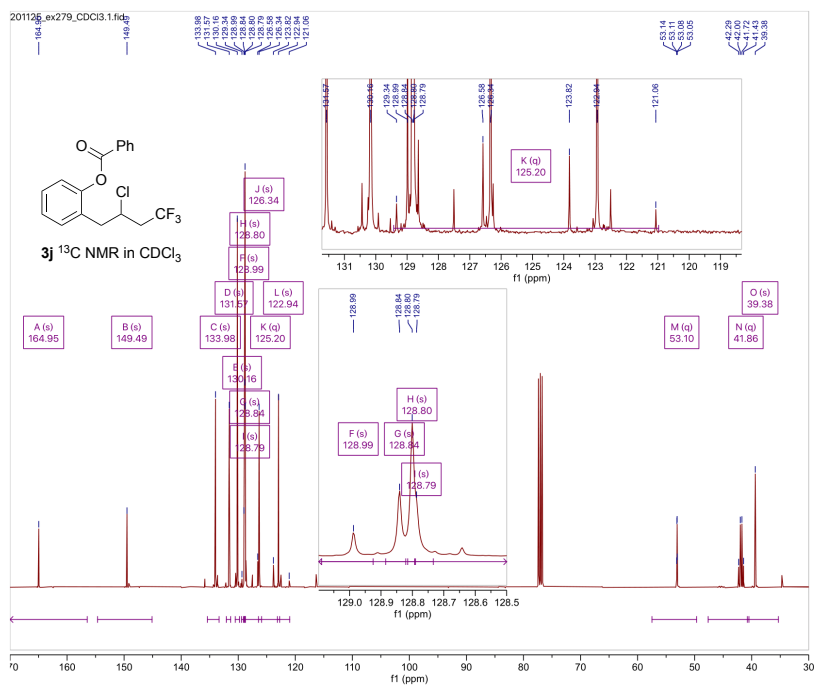

| Parameter                  | Value                                                                                     |
|----------------------------|-------------------------------------------------------------------------------------------|
| 1 Data File Name           | C:/Users/furuyama/Documents/Personaldata/IshikawaYuta/NMR/生data/201125_ex279_CDCI3/1/ fid |
| 2 Title                    | 201125_ex279_CDCI3.1.fid                                                                  |
| 3 Comment                  |                                                                                           |
| 4 Origin                   | Bruker BioSpin GmbH                                                                       |
| 5 Owner                    | nmsru                                                                                     |
| 6 Site                     |                                                                                           |
| 7 Instrument               | Avance                                                                                    |
| 8 Author                   |                                                                                           |
| 9 Solvent                  | CDCl3                                                                                     |
| 10 Temperature             | 298.1                                                                                     |
| 11 Pulse Sequence          | zgpg30                                                                                    |
| 12 Experiment              | 1D                                                                                        |
| 13 Probe                   | Z116098_0842 (PA BBO 400S1 BBF-H-D-05 Z SP)                                               |
| 14 Number of Scans         | 10000                                                                                     |
| 15 Receiver Gain           | 28.7                                                                                      |
| 16 Relaxation Delay        | 2.0000                                                                                    |
| 17 Pulse Width             | 10.0000                                                                                   |
| 18 Presaturation Frequency |                                                                                           |
| 19 Acquisition Time        | 1.3763                                                                                    |
| 20 Acquisition Date        | 2020-11-26T05:39:08                                                                       |

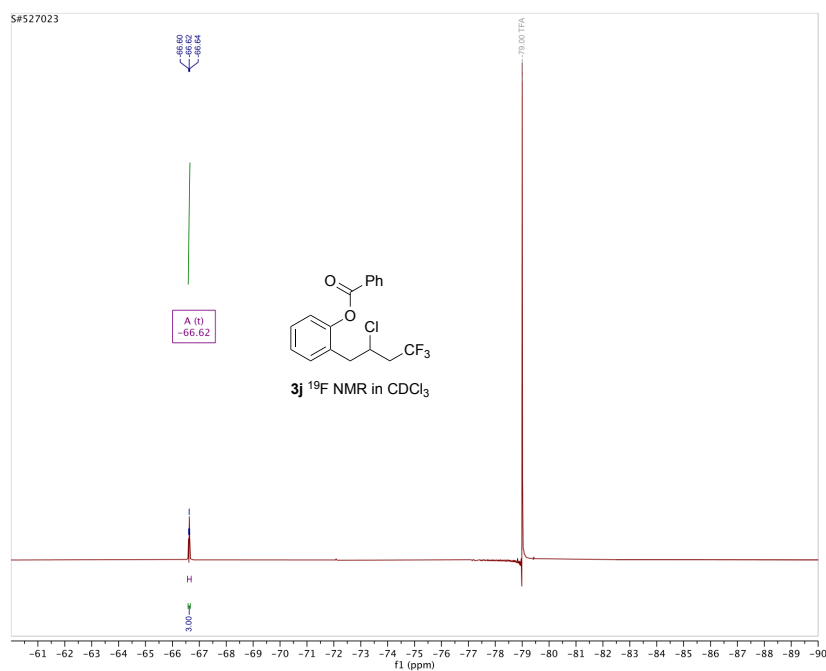

| Parameter                     | Value                                                                                                                      |
|-------------------------------|----------------------------------------------------------------------------------------------------------------------------|
| 1 Data File Name              | C:/ Users/<br>furuyama/<br>Documents/<br>Personaldata/<br>IshikawaYuta/<br>NMR/ 生data/<br>200918_ex279_CD<br>Cl3_19F-1.jdf |
| 2 Title                       | S#527023                                                                                                                   |
| 3 Comment                     |                                                                                                                            |
| 4 Origin                      | JEOL                                                                                                                       |
| 5 Owner                       |                                                                                                                            |
| 6 Site                        |                                                                                                                            |
| 7 Instrument                  | ECA 500                                                                                                                    |
| 8 Author                      | delta                                                                                                                      |
| 9 Solvent                     | CHLOROFORM-D                                                                                                               |
| 10 Temperature                | 20.9                                                                                                                       |
| 11 Pulse Sequence             | single_pulse.ex2                                                                                                           |
| 12 Experiment                 | 1D                                                                                                                         |
| 13 Probe                      | 2756                                                                                                                       |
| 14 Number of Scans            | 8                                                                                                                          |
| 15 Receiver Gain              | 44.0                                                                                                                       |
| 16 Relaxation Delay           | 5.0000                                                                                                                     |
| 17 Pulse Width                | 6.5500                                                                                                                     |
| 18 Presaturation<br>Frequency |                                                                                                                            |
| 19 Acquisition Time           | 0.1520                                                                                                                     |
| 20 Acquisition Date           | 2020-09-18T14:2<br>1:10                                                                                                    |
| 21 Modification Date          | 2020-09-18T14:4<br>0:20                                                                                                    |
| 22 Class                      |                                                                                                                            |
| 23 Spectrometer               | 470.62                                                                                                                     |

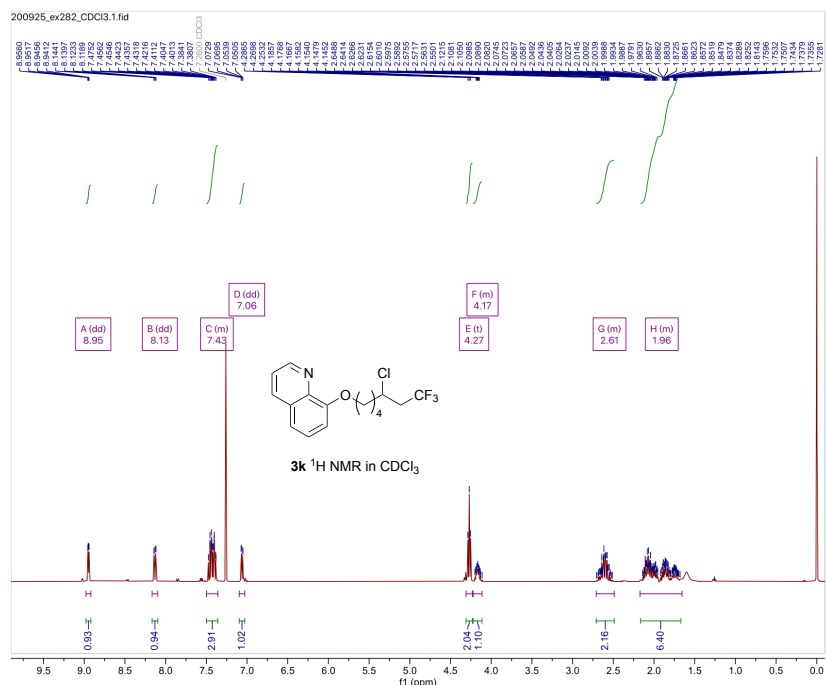

| Parameter                     | Value                                                                                                                    |
|-------------------------------|--------------------------------------------------------------------------------------------------------------------------|
| 1 Data File Name              | C:/ Users/<br>furuyama/<br>Documents/<br>Personaldata/<br>IshikawaYuta/<br>NMR/ 生data/<br>200925_ex282_C<br>DCI3/ 1/ fid |
| 2 Title                       | 200925_ex282_C<br>DCI3.1.fid                                                                                             |
| 3 Comment                     |                                                                                                                          |
| 4 Origin                      | Bruker BioSpin<br>GmbH                                                                                                   |
| 5 Owner                       | nmrsu                                                                                                                    |
| 6 Site                        |                                                                                                                          |
| 7 Instrument                  | Avance                                                                                                                   |
| 8 Author                      |                                                                                                                          |
| 9 Solvent                     | CDCl3                                                                                                                    |
| 10 Temperature                | 298.1                                                                                                                    |
| 11 Pulse Sequence             | zg30                                                                                                                     |
| 12 Experiment                 | 1D                                                                                                                       |
| 13 Probe                      | Z116098_0842<br>(PA BBO 400S1<br>BBF-H-D-05 Z SP)                                                                        |
| 14 Number of Scans            | 16                                                                                                                       |
| 15 Receiver Gain              | 101.0                                                                                                                    |
| 16 Relaxation Delay           | 1.0000                                                                                                                   |
| 17 Pulse Width                | 10.0000                                                                                                                  |
| 18 Presaturation<br>Frequency |                                                                                                                          |
| 19 Acquisition Time           | 3.9977                                                                                                                   |
| 20 Acquisition Date           | 2020-09-25T15:2<br>3:54                                                                                                  |
| 21 Modification Date          | 2020-09-25T15:2<br>2:36                                                                                                  |

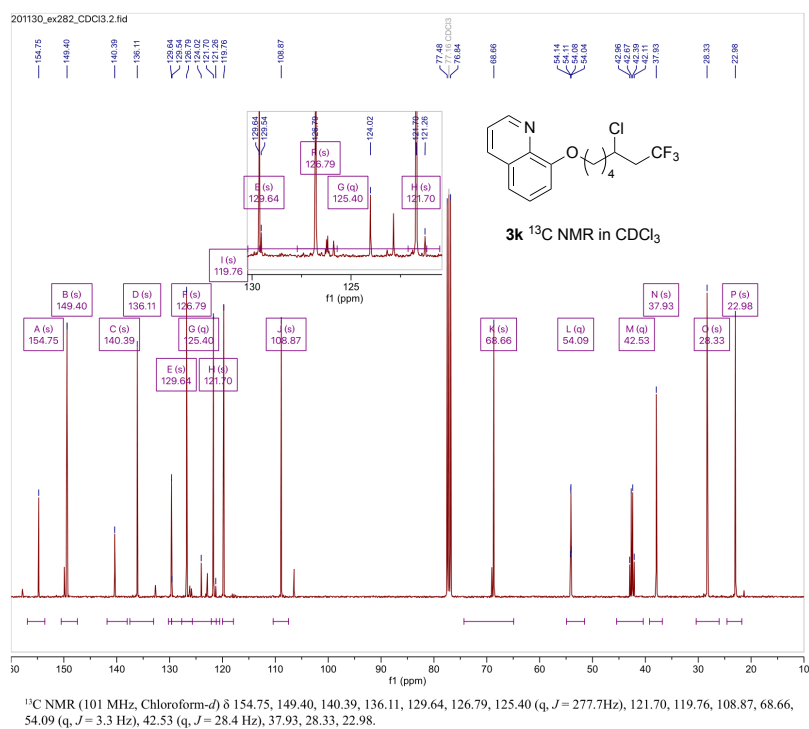

| Parameter                  | Value                                                                                      |
|----------------------------|--------------------------------------------------------------------------------------------|
| 1 Data File Name           | C:/Users/furuyama/Documents/Personaldata/IshikawaYuta/NMR/生data/201130_ex282_CDCl3/ 2/ fid |
| 2 Title                    | 201130_ex282_CDCl3.2.fid                                                                   |
| 3 Comment                  |                                                                                            |
| 4 Origin                   | Bruker BioSpin GmbH                                                                        |
| 5 Owner                    | nmsru                                                                                      |
| 6 Site                     |                                                                                            |
| 7 Instrument               | Avance                                                                                     |
| 8 Author                   |                                                                                            |
| 9 Solvent                  | CDCl3                                                                                      |
| 10 Temperature             | 298.2                                                                                      |
| 11 Pulse Sequence          | zgpg30                                                                                     |
| 12 Experiment              | 1D                                                                                         |
| 13 Probe                   | Z116098_0842 (PA BBO 400S1 BBF-H-D-05 Z SP)                                                |
| 14 Number of Scans         | 13585                                                                                      |
| 15 Receiver Gain           | 27.1                                                                                       |
| 16 Relaxation Delay        | 2.0000                                                                                     |
| 17 Pulse Width             | 10.0000                                                                                    |
| 18 Presaturation Frequency |                                                                                            |
| 19 Acquisition Time        | 1.3763                                                                                     |
| 20 Acquisition Date        | 2020-12-01T08:48:57                                                                        |

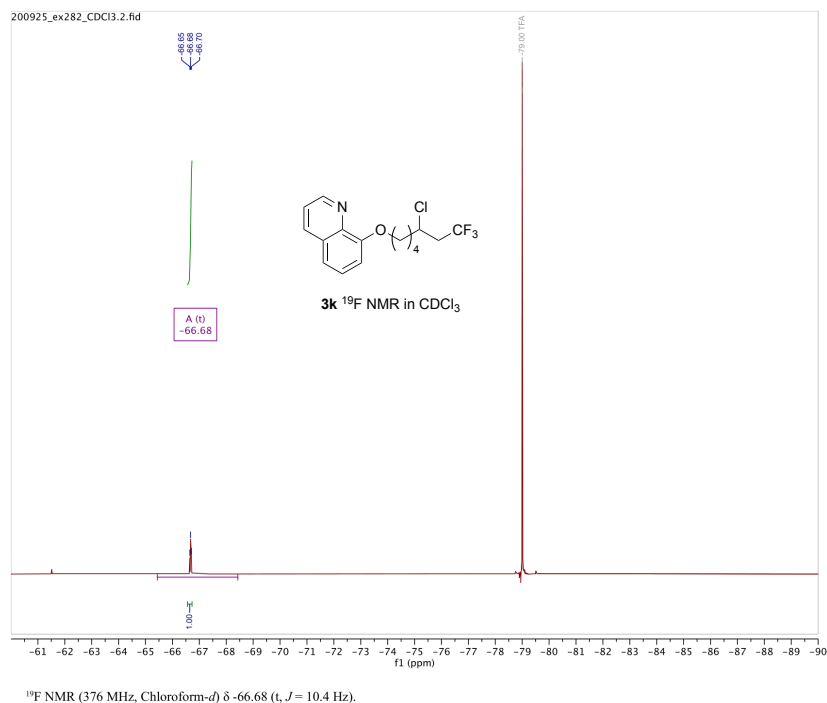

| Parameter                  | Value                                                                                      |
|----------------------------|--------------------------------------------------------------------------------------------|
| 1 Data File Name           | C:/Users/furuyama/Documents/Personaldata/IshikawaYuta/NMR/生data/200925_ex282_CDCl3/ 2/ fid |
| 2 Title                    | 200925_ex282_CDCl3.2.fid                                                                   |
| 3 Comment                  |                                                                                            |
| 4 Origin                   | Bruker BioSpin GmbH                                                                        |
| 5 Owner                    | nmsru                                                                                      |
| 6 Site                     |                                                                                            |
| 7 Instrument               | Avance                                                                                     |
| 8 Author                   |                                                                                            |
| 9 Solvent                  | CDCl3                                                                                      |
| 10 Temperature             | 298.1                                                                                      |
| 11 Pulse Sequence          | zg                                                                                         |
| 12 Experiment              | 1D                                                                                         |
| 13 Probe                   | Z116098_0842 (PA BBO 400S1 BBF-H-D-05 Z SP)                                                |
| 14 Number of Scans         | 16                                                                                         |
| 15 Receiver Gain           | 101.0                                                                                      |
| 16 Relaxation Delay        | 1.0000                                                                                     |
| 17 Pulse Width             | 18.0000                                                                                    |
| 18 Presaturation Frequency |                                                                                            |
| 19 Acquisition Time        | 0.7209                                                                                     |
| 20 Acquisition Date        | 2020-09-25T15:28:22                                                                        |
| 21 Modification Date       | 2020-09-25T15:28:22                                                                        |

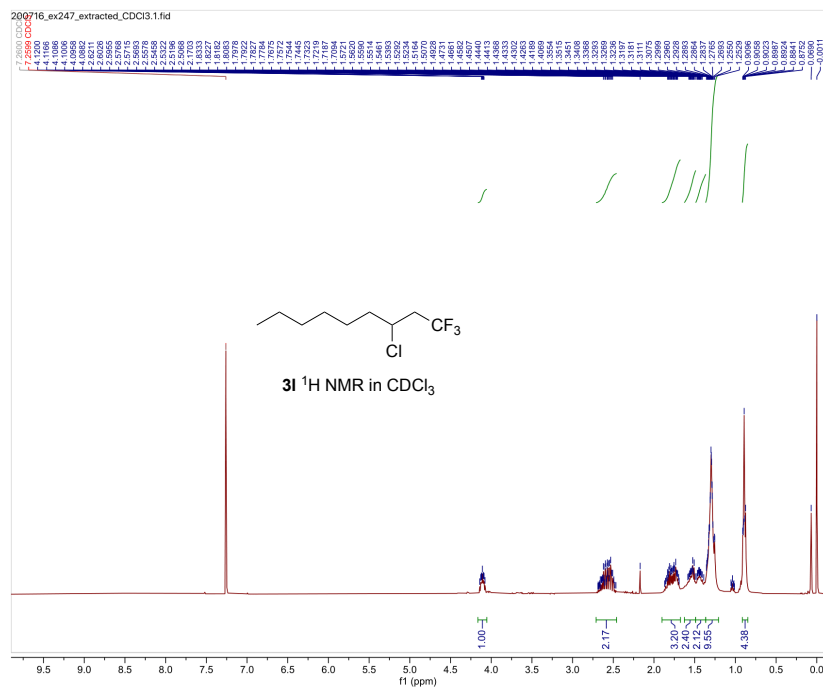

| Parameter                  | Value                                                                                                        |
|----------------------------|--------------------------------------------------------------------------------------------------------------|
| 1 Data File Name           | C:/ Users/ furuyama/ Documents/ Personaldata/ IshikawaYuta/ NMR/ 生data/ 200716_ex247_extracted_CDCl3/ 1/ fid |
| 2 Title                    | 200716_ex247_extracted_CDCl3.1.fid                                                                           |
| 3 Comment                  |                                                                                                              |
| 4 Origin                   | Bruker BioSpin GmbH                                                                                          |
| 5 Owner                    | nmsu                                                                                                         |
| 6 Site                     |                                                                                                              |
| 7 Instrument               | Avance                                                                                                       |
| 8 Author                   |                                                                                                              |
| 9 Solvent                  | CDCl <sub>3</sub>                                                                                            |
| 10 Temperature             | 298.1                                                                                                        |
| 11 Pulse Sequence          | zg30                                                                                                         |
| 12 Experiment              | 1D                                                                                                           |
| 13 Probe                   | Z116098_0842 (PA BBO 400S1 BBF-H-D-05 Z SP)                                                                  |
| 14 Number of Scans         | 16                                                                                                           |
| 15 Receiver Gain           | 101.0                                                                                                        |
| 16 Relaxation Delay        | 1.0000                                                                                                       |
| 17 Pulse Width             | 10.0000                                                                                                      |
| 18 Presaturation Frequency |                                                                                                              |
| 19 Acquisition Time        | 3.9977                                                                                                       |
| 20 Acquisition Date        | 2020-07-16T19:06:06                                                                                          |

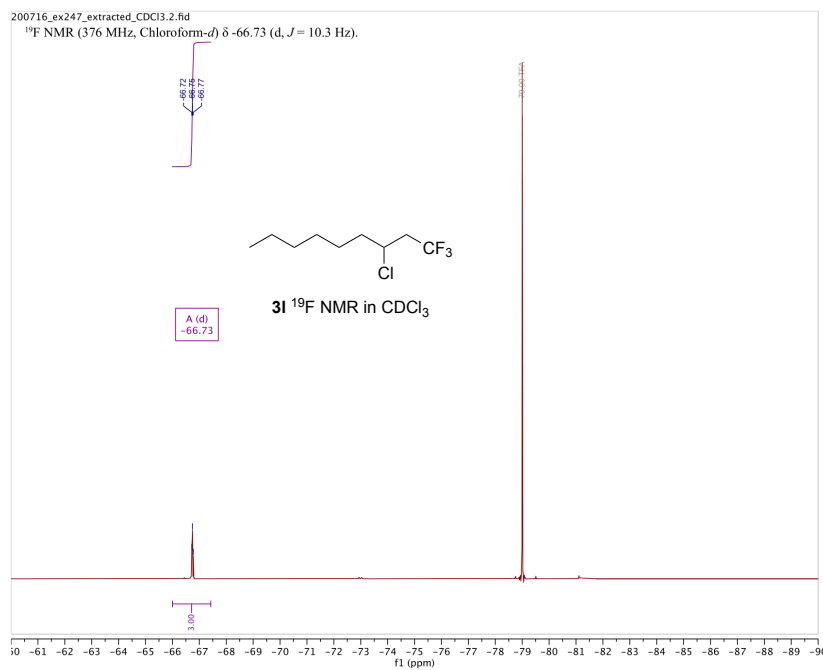

| Parameter                  | Value                                                                                                        |
|----------------------------|--------------------------------------------------------------------------------------------------------------|
| 1 Data File Name           | C:/ Users/ furuyama/ Documents/ Personaldata/ IshikawaYuta/ NMR/ 生data/ 200716_ex247_extracted_CDCl3/ 2/ fid |
| 2 Title                    | 200716_ex247_extracted_CDCl3.2.fid                                                                           |
| 3 Comment                  |                                                                                                              |
| 4 Origin                   | Bruker BioSpin GmbH                                                                                          |
| 5 Owner                    | nmsu                                                                                                         |
| 6 Site                     |                                                                                                              |
| 7 Instrument               | Avance                                                                                                       |
| 8 Author                   |                                                                                                              |
| 9 Solvent                  | CDCl <sub>3</sub>                                                                                            |
| 10 Temperature             | 298.1                                                                                                        |
| 11 Pulse Sequence          | zg                                                                                                           |
| 12 Experiment              | 1D                                                                                                           |
| 13 Probe                   | Z116098_0842 (PA BBO 400S1 BBF-H-D-05 Z SP)                                                                  |
| 14 Number of Scans         | 16                                                                                                           |
| 15 Receiver Gain           | 101.0                                                                                                        |
| 16 Relaxation Delay        | 1.0000                                                                                                       |
| 17 Pulse Width             | 18.0000                                                                                                      |
| 18 Presaturation Frequency |                                                                                                              |
| 19 Acquisition Time        | 0.7209                                                                                                       |
| 20 Acquisition Date        | 2020-07-16T19:10:34                                                                                          |

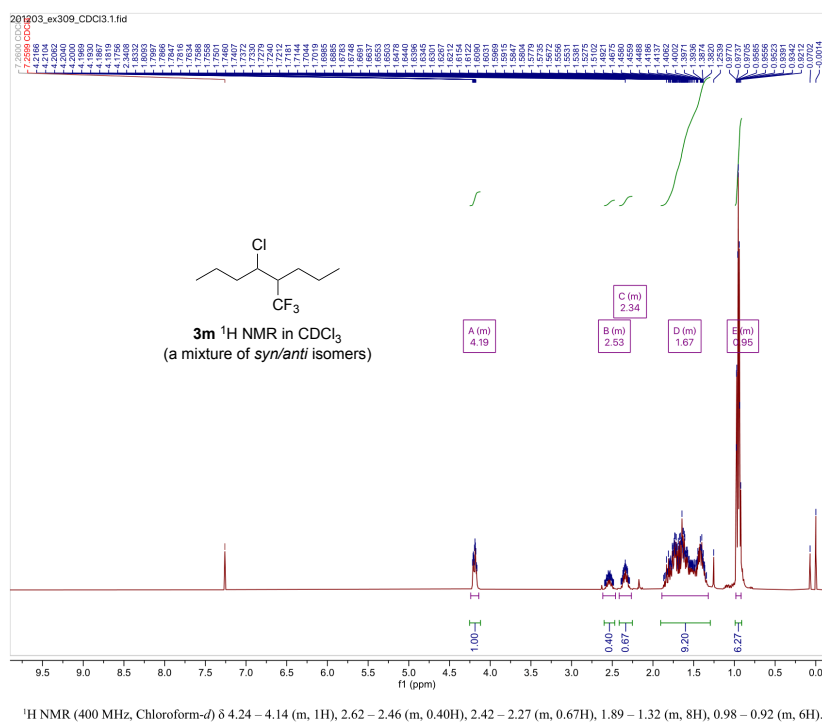

| Parameter                     | Value                                                                                                                    |
|-------------------------------|--------------------------------------------------------------------------------------------------------------------------|
| 1 Data File Name              | C:/ Users/<br>furuyama/<br>Documents/<br>Personaldata/<br>IshikawaYuta/<br>NMR/ 生data/<br>201203_ex309_C<br>DCI3/ 1/ fid |
| 2 Title                       | 201203_ex309_C<br>DCI3.1.fid                                                                                             |
| 3 Comment                     |                                                                                                                          |
| 4 Origin                      | Bruker BioSpin<br>GmbH                                                                                                   |
| 5 Owner                       | nmsu                                                                                                                     |
| 6 Site                        |                                                                                                                          |
| 7 Instrument                  | Avance                                                                                                                   |
| 8 Author                      |                                                                                                                          |
| 9 Solvent                     | CDCl <sub>3</sub>                                                                                                        |
| 10 Temperature                | 298.2                                                                                                                    |
| 11 Pulse Sequence             | zg30                                                                                                                     |
| 12 Experiment                 | 1D                                                                                                                       |
| 13 Probe                      | Z116098_0842<br>(PA BBO 400S1<br>BBF-H-D-05 Z SP)                                                                        |
| 14 Number of Scans            | 16                                                                                                                       |
| 15 Receiver Gain              | 32.0                                                                                                                     |
| 16 Relaxation Delay           | 1.0000                                                                                                                   |
| 17 Pulse Width                | 10.0000                                                                                                                  |
| 18 Presaturation<br>Frequency |                                                                                                                          |
| 19 Acquisition Time           | 3.9977                                                                                                                   |
| 20 Acquisition Date           | 2020-12-03T09:1<br>9:06                                                                                                  |
| 21 Modification Date          | 2020-12-03T09:1<br>6:34                                                                                                  |

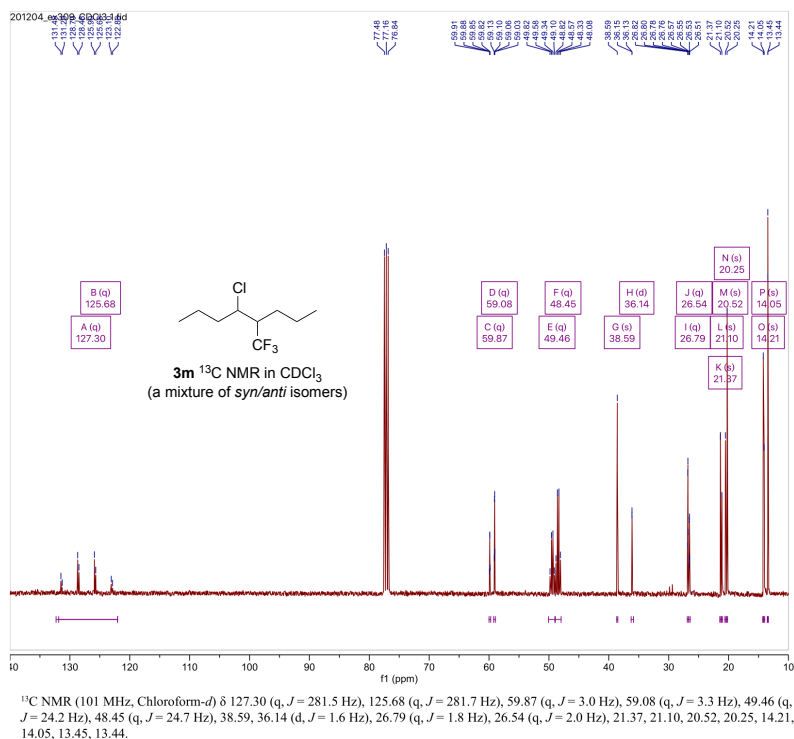

| Parameter                     | Value                                                                                                                    |
|-------------------------------|--------------------------------------------------------------------------------------------------------------------------|
| 1 Data File Name              | C:/ Users/<br>furuyama/<br>Documents/<br>Personaldata/<br>IshikawaYuta/<br>NMR/ 生data/<br>201204_ex309_C<br>DCI3/ 1/ fid |
| 2 Title                       | 201204_ex309_C<br>DCI3.1.fid                                                                                             |
| 3 Comment                     |                                                                                                                          |
| 4 Origin                      | Bruker BioSpin<br>GmbH                                                                                                   |
| 5 Owner                       | nmsu                                                                                                                     |
| 6 Site                        |                                                                                                                          |
| 7 Instrument                  | Avance                                                                                                                   |
| 8 Author                      |                                                                                                                          |
| 9 Solvent                     | CDCl <sub>3</sub>                                                                                                        |
| 10 Temperature                | 298.2                                                                                                                    |
| 11 Pulse Sequence             | zgpg30                                                                                                                   |
| 12 Experiment                 | 1D                                                                                                                       |
| 13 Probe                      | Z116098_0842<br>(PA BBO 400S1<br>BBF-H-D-05 Z SP)                                                                        |
| 14 Number of Scans            | 839                                                                                                                      |
| 15 Receiver Gain              | 26.4                                                                                                                     |
| 16 Relaxation Delay           | 2.0000                                                                                                                   |
| 17 Pulse Width                | 10.0000                                                                                                                  |
| 18 Presaturation<br>Frequency |                                                                                                                          |
| 19 Acquisition Time           | 1.3763                                                                                                                   |
| 20 Acquisition Date           | 2020-12-04T10:5<br>1:10                                                                                                  |



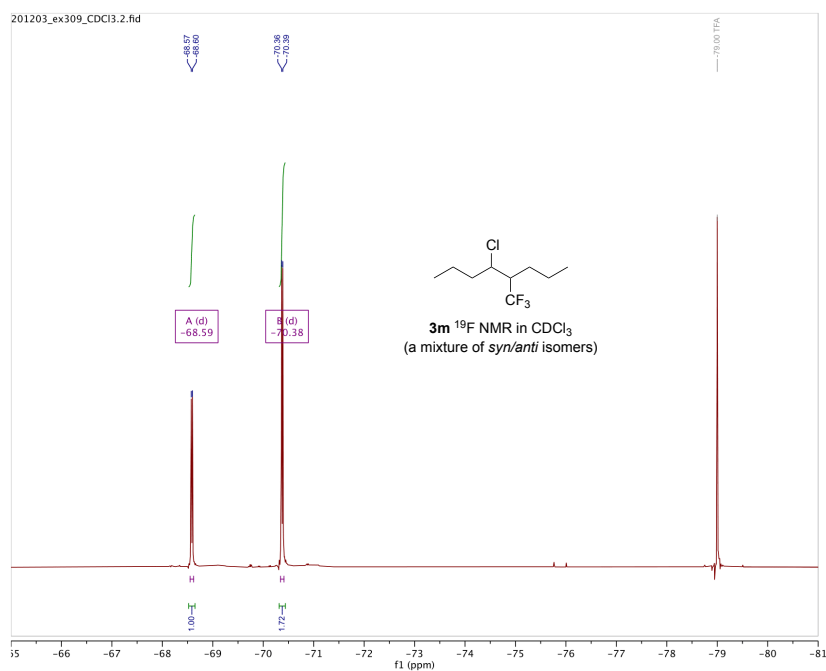

<sup>19</sup>F NMR (376 MHz, Chloroform-*d*)  $\delta$  -68.59 (d,  $J$  = 9.6 Hz), -70.38 (d,  $J$  = 9.1 Hz).

| Parameter                  | Value                                                                                               |
|----------------------------|-----------------------------------------------------------------------------------------------------|
| 1 Data File Name           | C:/ Users/ furuyama/ Documents/ Personaldata/ IshikawaYuta/ NMR/ 生data/ 201203_ex309_CD Cl3/ 2/ fid |
| 2 Title                    | 201203_ex309_CD Cl3.2.fid                                                                           |
| 3 Comment                  |                                                                                                     |
| 4 Origin                   | Bruker BioSpin GmbH                                                                                 |
| 5 Owner                    | nmrstu                                                                                              |
| 6 Site                     |                                                                                                     |
| 7 Instrument               | Avance                                                                                              |
| 8 Author                   |                                                                                                     |
| 9 Solvent                  | CDCl <sub>3</sub>                                                                                   |
| 10 Temperature             | 298.2                                                                                               |
| 11 Pulse Sequence          | zg                                                                                                  |
| 12 Experiment              | 1D                                                                                                  |
| 13 Probe                   | Z116098_0842 (PA BBO 400S1 BBF-H-D-05 Z SP)                                                         |
| 14 Number of Scans         | 16                                                                                                  |
| 15 Receiver Gain           | 101.0                                                                                               |
| 16 Relaxation Delay        | 1.0000                                                                                              |
| 17 Pulse Width             | 18.0000                                                                                             |
| 18 Presaturation Frequency |                                                                                                     |
| 19 Acquisition Time        | 0.7209                                                                                              |
| 20 Acquisition Date        | 2020-12-03T09:2 4:08                                                                                |
| 21 Modification Date       | 2020-12-03T09:2                                                                                     |

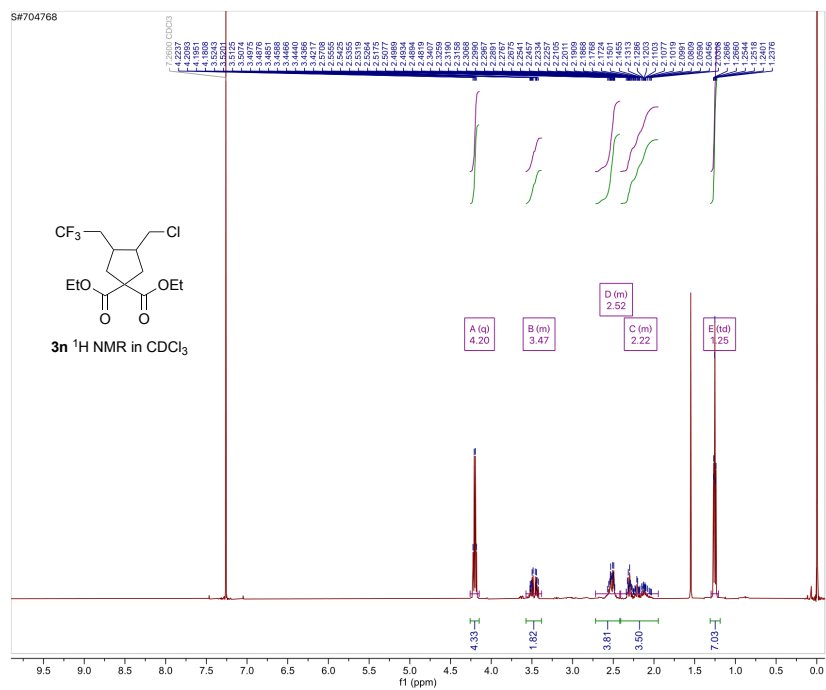

| Parameter                  | Value                                                                                               |
|----------------------------|-----------------------------------------------------------------------------------------------------|
| 1 Data File Name           | C:/ Users/ furuyama/ Documents/ Personaldata/ IshikawaYuta/ NMR/ 生data/ 201022_ex295_C DCI3_2-1.jdf |
| 2 Title                    | S#704768                                                                                            |
| 3 Comment                  |                                                                                                     |
| 4 Origin                   | JEOL                                                                                                |
| 5 Owner                    |                                                                                                     |
| 6 Site                     |                                                                                                     |
| 7 Instrument               | ECA 500                                                                                             |
| 8 Author                   | delta                                                                                               |
| 9 Solvent                  | CHLOROFORM-D                                                                                        |
| 10 Temperature             | 20.5                                                                                                |
| 11 Pulse Sequence          | single_pulse.ex2                                                                                    |
| 12 Experiment              | 1D                                                                                                  |
| 13 Probe                   | 2756                                                                                                |
| 14 Number of Scans         | 8                                                                                                   |
| 15 Receiver Gain           | 52.0                                                                                                |
| 16 Relaxation Delay        | 5.0000                                                                                              |
| 17 Pulse Width             | 5.7000                                                                                              |
| 18 Presaturation Frequency |                                                                                                     |
| 19 Acquisition Time        | 1.7459                                                                                              |
| 20 Acquisition Date        | 2020-10-22T19:1 1:27                                                                                |
| 21 Modification Date       | 2020-10-22T19:3 6:10                                                                                |
| 22 Class                   |                                                                                                     |
| 23 Spectrometer Frequency  | 500.16                                                                                              |

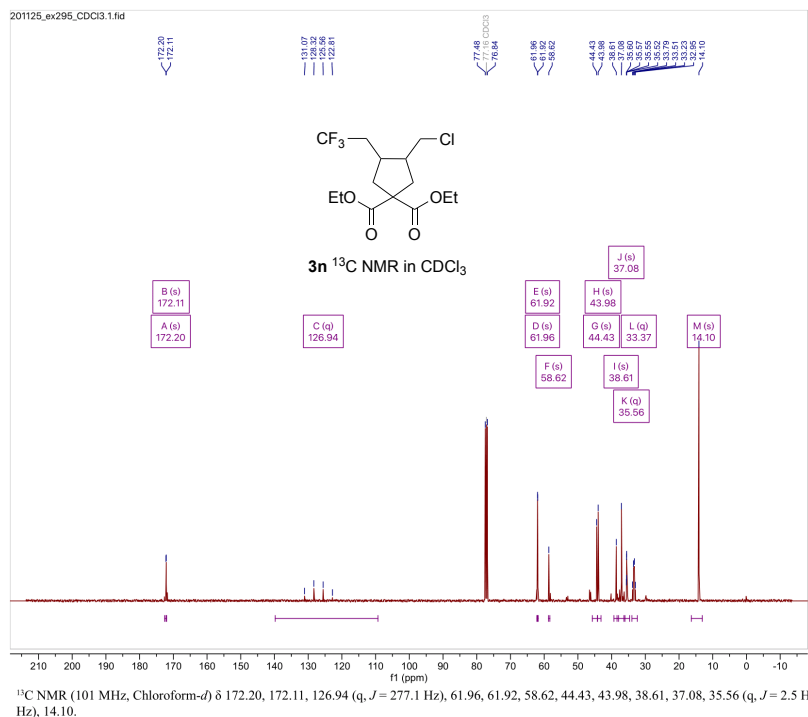

| Parameter                  | Value                                                                                      |
|----------------------------|--------------------------------------------------------------------------------------------|
| 1 Data File Name           | C:/Users/furuyama/Documents/Personaldata/IshikawaYuta/NMR/生data/201125_ex295_CDCl3/ 1/ fid |
| 2 Title                    | 201125_ex295_CDCl3.1.fid                                                                   |
| 3 Comment                  |                                                                                            |
| 4 Origin                   | Bruker BioSpin GmbH                                                                        |
| 5 Owner                    | nmsru                                                                                      |
| 6 Site                     |                                                                                            |
| 7 Instrument               | Avance                                                                                     |
| 8 Author                   |                                                                                            |
| 9 Solvent                  | CDCl3                                                                                      |
| 10 Temperature             | 298.5                                                                                      |
| 11 Pulse Sequence          | zgpg30                                                                                     |
| 12 Experiment              | 1D                                                                                         |
| 13 Probe                   | Z116098_0842 (PA BBO 400S1 BBF-H-D-05 Z SP)                                                |
| 14 Number of Scans         | 1024                                                                                       |
| 15 Receiver Gain           | 27.1                                                                                       |
| 16 Relaxation Delay        | 2.0000                                                                                     |
| 17 Pulse Width             | 10.0000                                                                                    |
| 18 Presaturation Frequency |                                                                                            |
| 19 Acquisition Time        | 1.3763                                                                                     |
| 20 Acquisition Date        | 2020-11-25T20:02:48                                                                        |

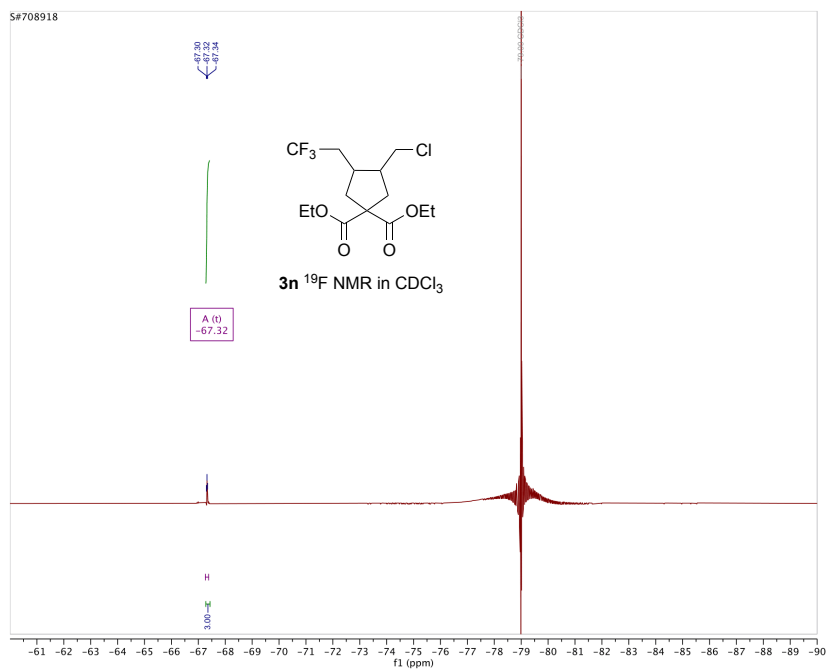

| Parameter                  | Value                                                                                          |
|----------------------------|------------------------------------------------------------------------------------------------|
| 1 Data File Name           | C:/Users/furuyama/Documents/Personaldata/IshikawaYuta/NMR/生data/201022_ex295_CDCl3_2_19F-1.jdf |
| 2 Title                    | S#708918                                                                                       |
| 3 Comment                  |                                                                                                |
| 4 Origin                   | JEOL                                                                                           |
| 5 Owner                    |                                                                                                |
| 6 Site                     |                                                                                                |
| 7 Instrument               | ECA 500                                                                                        |
| 8 Author                   | delta                                                                                          |
| 9 Solvent                  | CHLOROFORM-D                                                                                   |
| 10 Temperature             | 20.8                                                                                           |
| 11 Pulse Sequence          | single_pulse.ex2                                                                               |
| 12 Experiment              | 1D                                                                                             |
| 13 Probe                   | 2756                                                                                           |
| 14 Number of Scans         | 4                                                                                              |
| 15 Receiver Gain           | 46.0                                                                                           |
| 16 Relaxation Delay        | 5.0000                                                                                         |
| 17 Pulse Width             | 6.5500                                                                                         |
| 18 Presaturation Frequency |                                                                                                |
| 19 Acquisition Time        | 0.1520                                                                                         |
| 20 Acquisition Date        | 2020-10-22T19:18:30                                                                            |
| 21 Modification Date       | 2020-10-22T19:43:13                                                                            |
| 22 Class                   |                                                                                                |
| 23 Spectrometer            | 470.62                                                                                         |

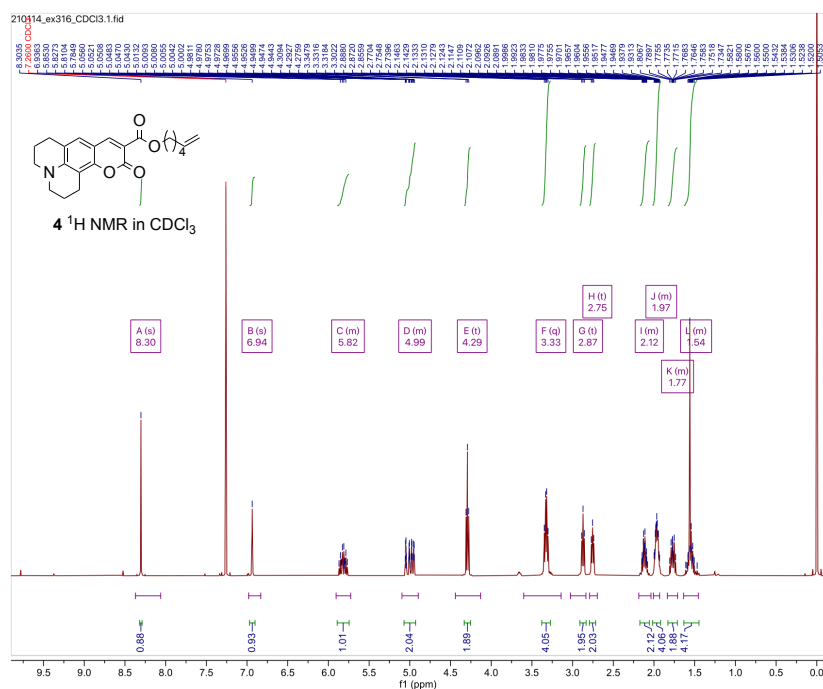

<sup>1</sup>H NMR (400 MHz, Chloroform-*d*) δ 8.30 (s, 1H), 6.94 (s, 1H), 5.91 – 5.73 (m, 1H), 5.10 – 4.90 (m, 2H), 4.29 (t, *J* = 6.7 Hz, 2H), 3.33 (q, *J* = 6.5 Hz, 4H), 2.87 (t, *J* = 6.4 Hz, 2H), 2.75 (t, *J* = 6.2 Hz, 2H), 2.19 – 2.04 (m, 2H), 2.01 – 1.93 (m, 4H), 1.84 – 1.71 (m, 2H), 1.64 – 1.46 (m, 4H).

| Parameter                  | Value                                                                                    |
|----------------------------|------------------------------------------------------------------------------------------|
| 1 Data File Name           | C:/Users/furuyama/Documents/Personaldata/IshikawaYuta/NMR/生data/210114_ex316_CDCI3/1/fid |
| 2 Title                    | 210114_ex316_CDCI3.1.fid                                                                 |
| 3 Comment                  |                                                                                          |
| 4 Origin                   | Bruker BioSpin GmbH                                                                      |
| 5 Owner                    | nmsu                                                                                     |
| 6 Site                     |                                                                                          |
| 7 Instrument               | Avance                                                                                   |
| 8 Author                   |                                                                                          |
| 9 Solvent                  | CDCl3                                                                                    |
| 10 Temperature             | 298.1                                                                                    |
| 11 Pulse Sequence          | zg30                                                                                     |
| 12 Experiment              | 1D                                                                                       |
| 13 Probe                   | Z116098_0842 (PA BBO 400S1 BBF-H-D-05 Z SP)                                              |
| 14 Number of Scans         | 16                                                                                       |
| 15 Receiver Gain           | 101.0                                                                                    |
| 16 Relaxation Delay        | 1.0000                                                                                   |
| 17 Pulse Width             | 10.0000                                                                                  |
| 18 Presaturation Frequency |                                                                                          |
| 19 Acquisition Time        | 3.9977                                                                                   |
| 20 Acquisition Date        | 2021-01-14T16:02:10                                                                      |
| 21 Modification Date       | 2021-01-14T16:01:74                                                                      |

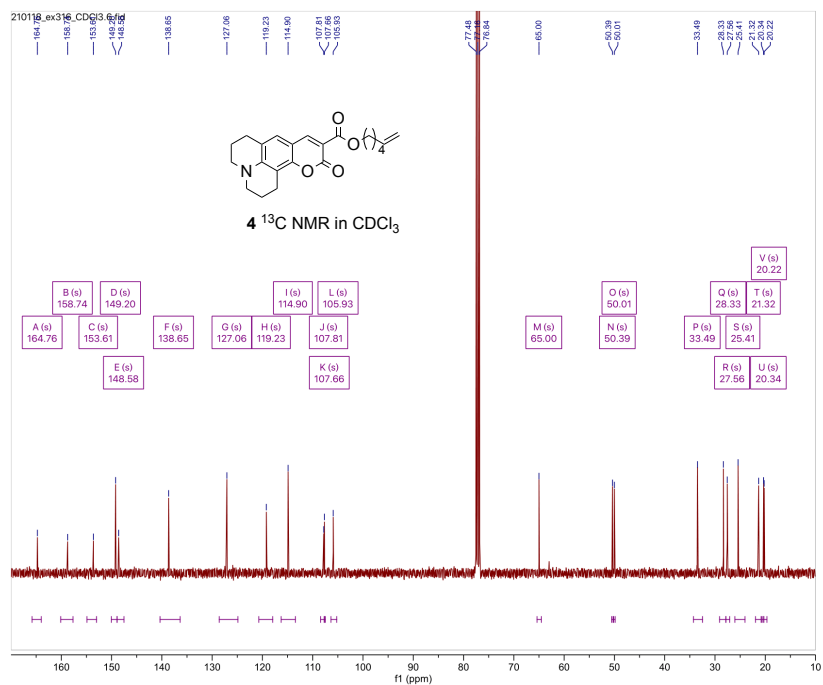

<sup>13</sup>C NMR (101 MHz, Chloroform-*d*) δ 164.76, 158.74, 153.61, 149.20, 148.58, 138.65, 127.06, 119.23, 114.90, 107.81, 107.66, 105.93, 65.00, 50.39, 50.01, 33.49, 28.33, 27.56, 25.41, 21.32, 20.34, 20.22.

| Parameter                  | Value                                                                                    |
|----------------------------|------------------------------------------------------------------------------------------|
| 1 Data File Name           | C:/Users/furuyama/Documents/Personaldata/IshikawaYuta/NMR/生data/210118_ex316_CDCI3/6/fid |
| 2 Title                    | 210118_ex316_CDCI3.6.fid                                                                 |
| 3 Comment                  |                                                                                          |
| 4 Origin                   | Bruker BioSpin GmbH                                                                      |
| 5 Owner                    | nmsu                                                                                     |
| 6 Site                     |                                                                                          |
| 7 Instrument               | Avance                                                                                   |
| 8 Author                   |                                                                                          |
| 9 Solvent                  | CDCl3                                                                                    |
| 10 Temperature             | 298.1                                                                                    |
| 11 Pulse Sequence          | zgpg30                                                                                   |
| 12 Experiment              | 1D                                                                                       |
| 13 Probe                   | Z116098_0842 (PA BBO 400S1 BBF-H-D-05 Z SP)                                              |
| 14 Number of Scans         | 792                                                                                      |
| 15 Receiver Gain           | 21.7                                                                                     |
| 16 Relaxation Delay        | 2.0000                                                                                   |
| 17 Pulse Width             | 10.0000                                                                                  |
| 18 Presaturation Frequency |                                                                                          |
| 19 Acquisition Time        | 1.3763                                                                                   |
| 20 Acquisition Date        | 2021-01-18T14:50:39                                                                      |

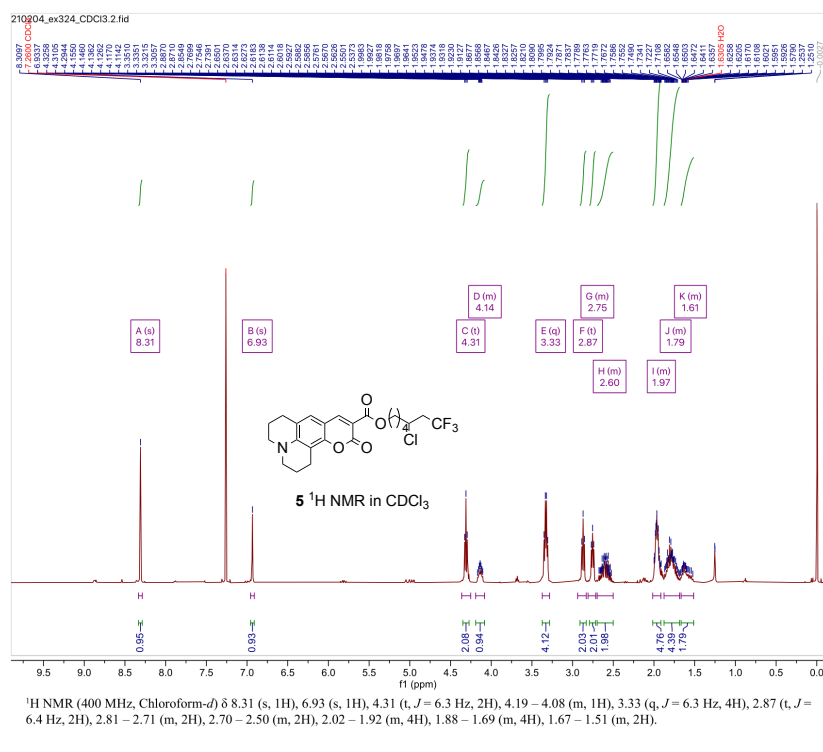

| Parameter                  | Value                                                                                               |
|----------------------------|-----------------------------------------------------------------------------------------------------|
| 1 Data File Name           | C:/ Users/ furuyama/ Documents/ Personaldata/ IshikawaYuta/ NMR/ 生data/ 210204_ex324_C DCI3/ 2/ fid |
| 2 Title                    | 210204_ex324_C DCI3.2.fid                                                                           |
| 3 Comment                  |                                                                                                     |
| 4 Origin                   | Bruker BioSpin GmbH                                                                                 |
| 5 Owner                    | nmsru                                                                                               |
| 6 Site                     |                                                                                                     |
| 7 Instrument               | Avance                                                                                              |
| 8 Author                   |                                                                                                     |
| 9 Solvent                  | CDCl3                                                                                               |
| 10 Temperature             | 298.1                                                                                               |
| 11 Pulse Sequence          | zg30                                                                                                |
| 12 Experiment              | 1D                                                                                                  |
| 13 Probe                   | Z116098_0842 (PA BBO 400S1 BBF-H-D-05 Z SP)                                                         |
| 14 Number of Scans         | 16                                                                                                  |
| 15 Receiver Gain           | 101.0                                                                                               |
| 16 Relaxation Delay        | 1.0000                                                                                              |
| 17 Pulse Width             | 10.0000                                                                                             |
| 18 Presaturation Frequency |                                                                                                     |
| 19 Acquisition Time        | 3.9977                                                                                              |
| 20 Acquisition Date        | 2021-02-04T16:4 4:32                                                                                |
| 21 Modification Date       | 2021-02-04T16:4 4:18                                                                                |

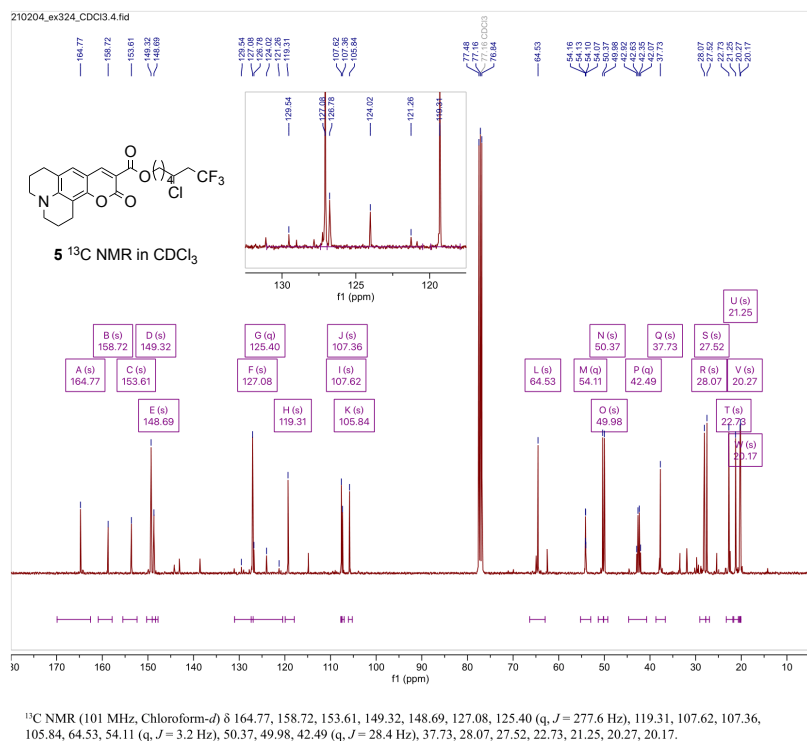

| Parameter                  | Value                                                                                               |
|----------------------------|-----------------------------------------------------------------------------------------------------|
| 1 Data File Name           | C:/ Users/ furuyama/ Documents/ Personaldata/ IshikawaYuta/ NMR/ 生data/ 210204_ex324_C DCI3/ 4/ fid |
| 2 Title                    | 210204_ex324_C DCI3.4.fid                                                                           |
| 3 Comment                  |                                                                                                     |
| 4 Origin                   | Bruker BioSpin GmbH                                                                                 |
| 5 Owner                    | nmsru                                                                                               |
| 6 Site                     |                                                                                                     |
| 7 Instrument               | Avance                                                                                              |
| 8 Author                   |                                                                                                     |
| 9 Solvent                  | CDCl3                                                                                               |
| 10 Temperature             | 298.2                                                                                               |
| 11 Pulse Sequence          | zgpg30                                                                                              |
| 12 Experiment              | 1D                                                                                                  |
| 13 Probe                   | Z116098_0842 (PA BBO 400S1 BBF-H-D-05 Z SP)                                                         |
| 14 Number of Scans         | 13054                                                                                               |
| 15 Receiver Gain           | 23.3                                                                                                |
| 16 Relaxation Delay        | 2.0000                                                                                              |
| 17 Pulse Width             | 10.0000                                                                                             |
| 18 Presaturation Frequency |                                                                                                     |
| 19 Acquisition Time        | 1.3763                                                                                              |
| 20 Acquisition Date        | 2021-02-05T08:3 9:44                                                                                |

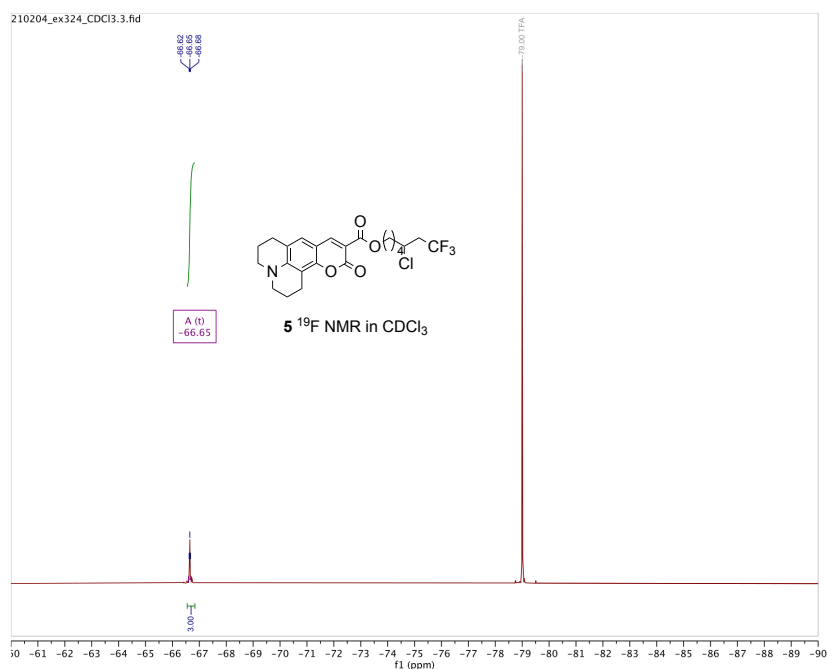

<sup>19</sup>F NMR (376 MHz, Chloroform-*d*) δ -66.65 (t, *J* = 10.3 Hz).

| Parameter                  | Value                                                                                     |
|----------------------------|-------------------------------------------------------------------------------------------|
| 1 Data File Name           | C:/Users/furuyama/Documents/Personaldata/IshikawaYuta/NMR/生data/210204_ex324_CDCl3/3/ fid |
| 2 Title                    | 210204_ex324_CDCl3.3.fid                                                                  |
| 3 Comment                  |                                                                                           |
| 4 Origin                   | Bruker BioSpin GmbH                                                                       |
| 5 Owner                    | nmsru                                                                                     |
| 6 Site                     |                                                                                           |
| 7 Instrument               | Avance                                                                                    |
| 8 Author                   |                                                                                           |
| 9 Solvent                  | CDCl3                                                                                     |
| 10 Temperature             | 298.2                                                                                     |
| 11 Pulse Sequence          | zg                                                                                        |
| 12 Experiment              | 1D                                                                                        |
| 13 Probe                   | Z116098_0842 (PA BBO 400S1 BBF-H-D-05 Z SP)                                               |
| 14 Number of Scans         | 16                                                                                        |
| 15 Receiver Gain           | 101.0                                                                                     |
| 16 Relaxation Delay        | 1.0000                                                                                    |
| 17 Pulse Width             | 18.0000                                                                                   |
| 18 Presaturation Frequency |                                                                                           |
| 19 Acquisition Time        | 0.7209                                                                                    |
| 20 Acquisition Date        | 2021-02-04T16:52:53                                                                       |
| 21 Modification Date       | 2021-02-04T16:52:53                                                                       |

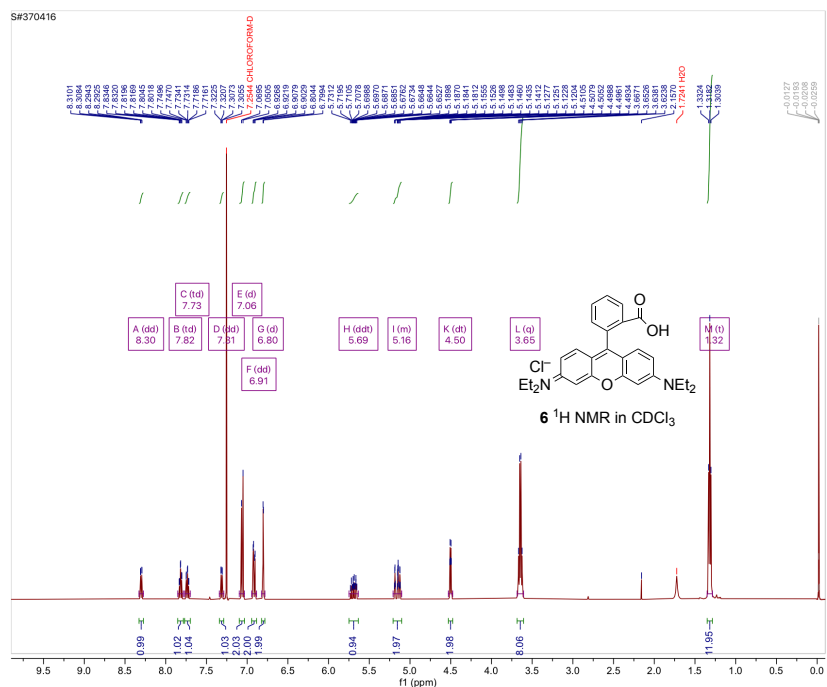

<sup>1</sup>H NMR (500 MHz, Chloroform-*d*) δ 8.30 (dd, *J* = 7.9, 0.9 Hz, 1H), 7.82 (td, *J* = 7.5, 1.3 Hz, 1H), 7.73 (td, *J* = 7.7, 1.3 Hz, 1H), 7.31 (dd, *J* = 7.6, 0.9 Hz, 1H), 7.06 (d, *J* = 9.5 Hz, 2H), 6.91 (dd, *J* = 9.5, 2.5 Hz, 2H), 6.80 (d, *J* = 2.5 Hz, 2H), 5.69 (ddt, *J* = 17.2, 10.4, 5.9 Hz, 1H), 5.21 – 5.10 (m, 2H), 4.50 (dt, *J* = 5.9, 1.3 Hz, 2H), 3.65 (q, *J* = 7.2 Hz, 8H), 1.32 (t, *J* = 7.1 Hz, 12H).

| Parameter                  | Value                                                                                      |
|----------------------------|--------------------------------------------------------------------------------------------|
| 1 Data File Name           | C:/Users/furuyama/Documents/Personaldata/IshikawaYuta/NMR/生data/201102_ex298_2_CDCl3-1.jdf |
| 2 Title                    | S#370416                                                                                   |
| 3 Comment                  |                                                                                            |
| 4 Origin                   | JEOL                                                                                       |
| 5 Owner                    |                                                                                            |
| 6 Site                     |                                                                                            |
| 7 Instrument               | ECA 500                                                                                    |
| 8 Author                   | delta                                                                                      |
| 9 Solvent                  | CHLOROFORM-D                                                                               |
| 10 Temperature             | 20.2                                                                                       |
| 11 Pulse Sequence          | single_pulse.ex2                                                                           |
| 12 Experiment              | 1D                                                                                         |
| 13 Probe                   | 2756                                                                                       |
| 14 Number of Scans         | 8                                                                                          |
| 15 Receiver Gain           | 46.0                                                                                       |
| 16 Relaxation Delay        | 5.0000                                                                                     |
| 17 Pulse Width             | 5.7000                                                                                     |
| 18 Presaturation Frequency |                                                                                            |
| 19 Acquisition Time        | 1.7459                                                                                     |
| 20 Acquisition Date        | 2020-11-02T09:54:13                                                                        |
| 21 Modification Date       | 2020-11-02T10:18:55                                                                        |
| 22 Class                   |                                                                                            |
| 23 Spectrometer Frequency  | 500.16                                                                                     |

210112\_ex298\_CDCI3.2.fid

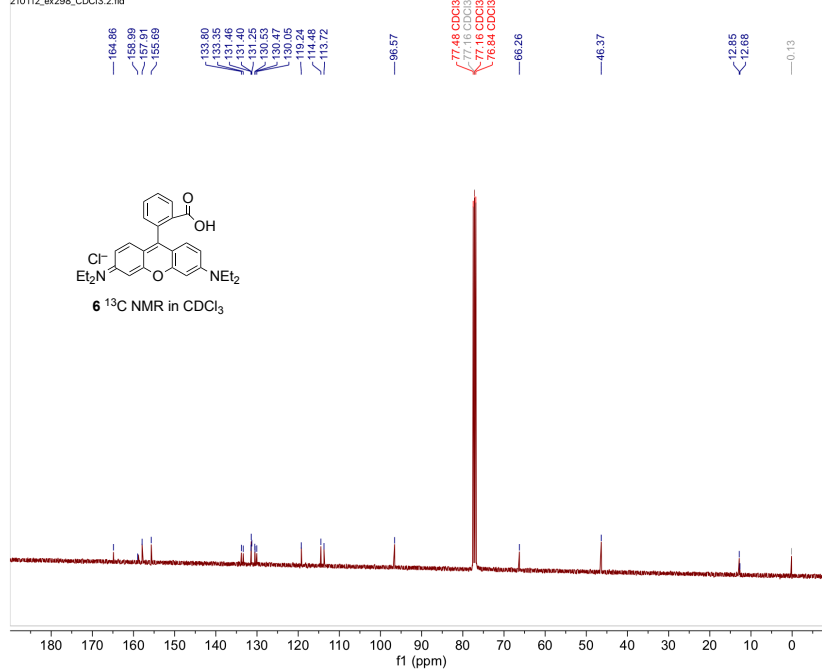

| パラメータ                 | 値                                                                                                                       |
|-----------------------|-------------------------------------------------------------------------------------------------------------------------|
| 1 データファイル名            | /Users/furuyama/Box/Manuscripts/ishikawayuta-RuPccalPhotoCF3Cl/ revised/ AllylRhodamine_NMR/ 210112_ex298_CDCI3/ 2/ fid |
| 2 タイトル                | 210112_ex298_CDCI3.2.fid                                                                                                |
| 3 コメント                |                                                                                                                         |
| 4 オリジン                | Bruker BioSpin GmbH                                                                                                     |
| 5 装置                  | Avance                                                                                                                  |
| 6 溶媒                  | CDCl <sub>3</sub>                                                                                                       |
| 7 温度                  | 298.1                                                                                                                   |
| 8 パルスシーケンス            | zgpg30                                                                                                                  |
| 9 実験                  | 1D                                                                                                                      |
| 10 プロープ               | Z116098_0842 (PA BBO 400S1 BBF-H-D-05 Z SP)                                                                             |
| 11 スキャン数              | 13967                                                                                                                   |
| 12 レシーバーゲイン           | 25.7                                                                                                                    |
| 13 固定周波数              |                                                                                                                         |
| 14 取得時間               | 1.3763                                                                                                                  |
| 15 取得日                | 2021-01-13T08:27:25                                                                                                     |
| 16 変更日                | 2021-01-13T08:26:46                                                                                                     |
| 17 クラス                |                                                                                                                         |
| 18 分光器周波数             | 100.62                                                                                                                  |
| 19 スペクトル幅             | 23809.5                                                                                                                 |
| 20 最低周波数              | -1843.5                                                                                                                 |
| 21 核                  | <sup>13</sup> C                                                                                                         |
| 22 収集サイズ              | 32768                                                                                                                   |
| 23 スペクトルサイズ           | 65536                                                                                                                   |
| 24 Digital Resolution | 0.36                                                                                                                    |

## References

- <sup>1</sup> L.-C. Liu and A. T. Hu, *J. Porphyrins Phthalocyanines* 2003, **7**, 565-571.
- <sup>2</sup> T. Furuyama, F. Shimasaki, N. Saikawa, H. Maeda and M. Segi, *Sci. Rep.* 2019, **9**, 16528.
- <sup>3</sup> R. Ebule, S. Mudshinge, M. H. Nantz, M. S. Mashuta, G. B. Hammond and B. Xu, *J. Org. Chem.* 2019, **84**, 3249-3259.
- <sup>4</sup> B.-Z. Fan, H. Hiasa, W. Lv, S. Brody, Z.-Y. Yang, C. Aldrich, M. Cushman and J.-H. Liang, *Eur. J. Med. Chem.* 2020, **193**, 112222.
- <sup>5</sup> M. J. Gresser, S. M. Wales and P. A. Keller, *Tetrahedron* 2010, **66**, 6965-6976.
- <sup>6</sup> G. Li, L. Wang, L. Wu, Z. Guo, J. Zhao, Y. Liu, R. Bai and X. Yan, *J. Am. Chem. Soc.* 2020, **142**, 14343-14349.
- <sup>7</sup> G. Villa, G. Povie and P. Renaud, *J. Am. Chem. Soc.* 2011, **133**, 5913-5920.
- <sup>8</sup> B. H. Lipshutz, S. Ghorai and W. W. Y. Leong, 2009, **74**, 2854-2857.
- <sup>9</sup> A. E. Díaz-Álvarez, P. Crochet and V. Cadierno, *Tetrahedron* 2012, **68**, 2611-2620.
- <sup>10</sup> J. Escudero, V. Bellosta and J. Cossy, *Angew. Chem. Int. Ed.* 2018, **57**, 574-578.
- <sup>11</sup> M. C. Burla, R. Caliendo, M. Camalli, B. Carrozzini, G. L. Casciarano, L. De Caro, C. Giacovazzo, G. Polidori and R. Spagna, *J. Appl. Cryst.* 2005, **38**, 381.
- <sup>12</sup> G. M. Sheldrick, *Acta Crystallogr. C, Struct. Chem.* 2015, **71**, 3-8.
- <sup>13</sup> Yadokari-XG, Software for Crystal Structure Analyses, K. Wakita (2001); Release of Software (Yadokari-XG 2009) for Crystal Structure Analyses, C. Kabuto, S. Akine, T. Nemoto and E. Kwon, *J. Cryst. Soc. Jpn.* 2009, **51**, 218-224.
- <sup>14</sup> (a) A. L. Spek, *Acta Crystallogr. Sect. A* 1990, **46**, c34; (b) P. van der Sluis and A. L. Spek, *Acta Crystallogr. Sect. A* 1990, **46**, 194.
- <sup>15</sup> R. C. Young, T. J. Meyer, D. G. Witten, *J. Am. Chem. Soc.*, 1976, **98**, 286-287.
- <sup>16</sup> G. J. Ferraudi and D. R. Prasad, *J. Chem. Soc., Dalton Trans.* 1984, 2137-2140.
- <sup>17</sup> N. P. Farrell, A. J. Murray, J. R. Thornback, D. H. Dolphin and B. R. James, *Inorg. Chim. Acta.* 1978, **28**, L144-L146

- <sup>18</sup> T. Rawling, H. Xiao, S.-T. Lee, S. B. Colbran and A. M. McDonagh, *Inorg. Chem.* 2007, **46**, 2805-2813.
- <sup>19</sup> G. Chen, F. Song, J. Wang, Z. Yang, S. Sun, J. Fan, X. Qiang, X. Wang, B. Dou and X. Peng, *Chem. Commun.* 2012, **48**, 2949-2951.
- <sup>20</sup> W. An, N. Ha, H. M. Lee, Y. R. Malpani, D.-H. Lee, Y.-S. Jung and S. B. Han, *Adv. Synth. Catal.* 2015, **357**, 3949-3960.
- <sup>21</sup> D. B. Bagal, G. Kachkovskiy, M. Knorn, T. Rawner, B. M. Bhanage and O. Reiser, *Angew. Chem. Int. Ed.* 2015, **54**, 6999-7002.
- <sup>22</sup> S. H. Oh, Y. R. Malpani, N. Ha, Y.-S. Jung and S. B. Han, *Org. Lett.* 2014, **16**, 1310-1313.
- <sup>23</sup> B. Yang, X.-H. Xu and F.-L. Qing, *Chin. J. Chem.* 2016, **34**, 465-468.
- <sup>24</sup> T. P. Nicholls, C. Caporale, M. Massi, M. G. Gardiner and A. C. Bissember, *Dalton Trans.* 2019, **48**, 7290-7301.
